# Supplementary material for: A novel approach to evaluation of adsorbents for sampling indoor volatile organic compounds associated with symptom reports
Source: Royal Society of Chemistry journal article supplement (doi:10.1039/b808654k), 2008-01-01
Supplement: figures_sup.pdf [file figures_sup.pdf]

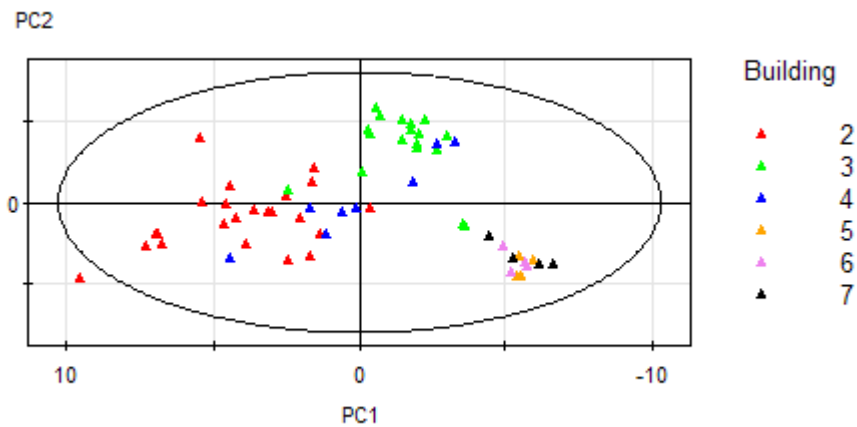

**Figure S1** PCA score plot for the first two components of the model obtained from measurements with Carbo-pack B. Each triangle represents one measurement. The different colours represent different buildings.

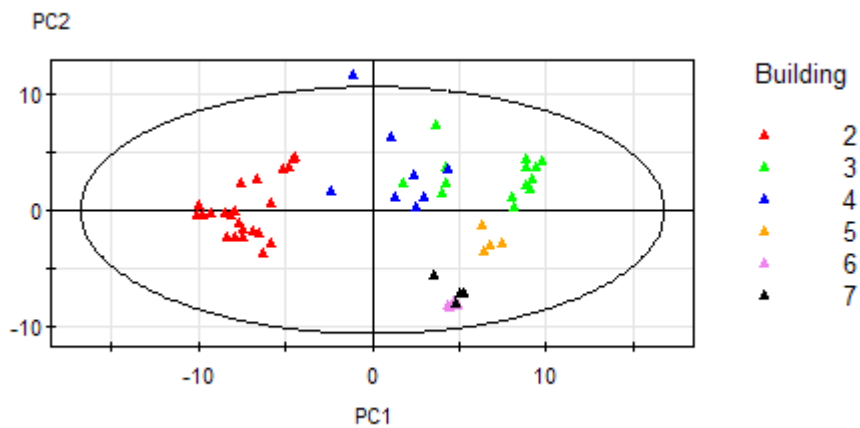

**Figure S2** PCA score plot for the first two components of the model obtained from measurements with Chromosorb 106. Each triangle represents one measurement. The different colours represent different buildings.
