# Supplementary material for: A novel approach to evaluation of adsorbents for sampling indoor volatile organic compounds associated with symptom reports
Source: Royal Society of Chemistry journal article supplement (doi:10.1039/b808654k), 2008-01-01
Supplement: tab_s1.pdf [file tab_s1.pdf]

| 0320-25 | 0320-26 | 0327-15 | 0327-16 | 0410-30 | 0410-31 | 0504-18 | 0504-19 | 1120-37 |
|---------|---------|---------|---------|---------|---------|---------|---------|---------|
| 9,0     | 8,6     | 5,6     | 6,1     | 8,0     | 6,2     |         |         | 1,5     |
| 9,0     | 10,9    | 5,4     | 4,1     | 0,8     |         |         |         |         |
| 8,0     | 10,7    |         |         |         |         |         |         |         |
| 1,4     | 4,5     | 1,7     |         | 0,6     | 0,5     |         |         |         |
| 1,0     | 1,1     |         | 2,6     |         | 0,9     | 0,4     |         |         |
|         |         |         |         | 0,3     | 0,3     |         |         |         |
| 1,1     | 1,6     |         | 1,5     | 0,9     | 1,1     | 0,8     |         |         |
| 0,7     | 1,5     |         |         | 0,3     | 1,1     |         |         |         |
|         |         |         |         |         | 5,0     |         |         |         |
| 3,3     | 4,9     |         | 0,5     |         |         | 0,5     |         |         |
|         |         |         |         |         | 0,3     |         |         |         |
|         | 0,7     |         | 2,6     |         | 0,3     | 3,0     | 3,0     |         |

| Number | Average | Min | Max  | s.dev |
|--------|---------|-----|------|-------|
| 6      | 7,2     | 5,6 | 9,0  | 1,5   |
| 9      | 3,1     | 1,5 | 4,3  | 1,0   |
| 5      | 6,0     | 0,8 | 10,9 | 4,0   |
| 5      | 4,6     | 0,6 | 10,7 | 4,5   |
| 10     | 1,5     | 0,5 | 4,5  | 1,3   |
| 6      | 1,2     | 0,4 | 2,6  | 0,8   |
| 4      | 0,7     | 0,3 | 1,4  | 0,5   |
| 6      | 1,2     | 0,8 | 1,6  | 0,3   |
| 4      | 0,9     | 0,3 | 1,5  | 0,5   |
| 4      | 2,0     | 0,7 | 5,0  | 2,0   |
| 4      | 2,3     | 0,5 | 4,9  | 2,2   |
| 4      | 0,4     | 0,2 | 0,7  | 0,2   |
| 5      | 4,0     | 1,0 | 10,0 | 3,7   |
| 5      | 1,9     | 0,3 | 3,0  | 1,3   |
