# Supplementary material for: A novel approach to evaluation of adsorbents for sampling indoor volatile organic compounds associated with symptom reports
Source: Royal Society of Chemistry journal article supplement (doi:10.1039/b808654k), 2008-01-01
Supplement: tab_s2.pdf [file tab_s2.pdf]

**Tabel S2.** Chromosorb 106. Variables (peaks) found in more than three blanks (ng/tube).

| Variable<br>Rel RT | Blank ID |         |         |         |         |         |         |         |
|--------------------|----------|---------|---------|---------|---------|---------|---------|---------|
|                    | 0131-26  | 0131-37 | 0131-47 | 0131-58 | 0219-05 | 0219-06 | 0223-05 | 0223-06 |
| 41,7               |          |         |         |         |         |         |         |         |
| 42,7               | 18,2     |         | 21,4    |         | 16,2    | 19,6    | 8,7     | 7,6     |
| 46,2               | 1,2      | 1,5     |         |         | 2,2     | 0,3     |         |         |
| 56,7               | 1,2      |         | 1,0     |         | 1,9     | 1,9     |         |         |
| 57,2               |          |         |         |         |         |         |         |         |
| 57,7               | 2,2      | 5,8     | 3,7     | 2,7     |         | 4,2     |         |         |
| 70,7               |          | 1,0     | 2,0     | 1,2     |         |         |         |         |
| 73,2               |          |         | 2,1     | 1,3     | 0,9     | 1,4     |         |         |
| 81,2               |          |         | 2,0     |         |         |         |         |         |
| 81,7               | 1,4      | 0,8     |         | 0,8     | 1,9     | 1,9     |         |         |
| 100,2              | 1,2      | 1,1     | 1,7     | 1,3     | 2,7     | 1,9     |         |         |
| 107,7              |          |         |         |         | 0,7     | 0,5     |         |         |
| 111,7              |          |         |         |         | 3,0     | 0,7     | 5,4     | 2,8     |
| 112,2              | 6,7      | 20,8    | 2,3     | 1,7     |         |         |         |         |
| 123,2              | 0,8      | 1,2     | 0,9     | 0,7     | 0,6     | 0,5     |         |         |
| 129,7              | 4,3      | 3,5     | 3,7     | 5,0     | 0,5     | 1,5     | 2,7     | 2,3     |
| 130,2              |          | 0,6     |         |         |         |         |         |         |
| 144,7              | 5,4      | 6,0     | 6,4     | 5,4     | 3,6     | 4,9     | 2,7     | 2,1     |
| 145,2              |          |         |         |         |         |         |         |         |
| 151,2              | 2,8      | 4,4     | 2,7     | 3,4     | 0,6     |         | 7,0     | 4,5     |
| 151,7              | 6,0      | 8,3     |         | 1,3     |         |         |         |         |
| 152,2              |          |         | 0,9     |         |         |         |         |         |
| 165,2              | 1,0      | 2,2     |         |         | 0,4     |         |         |         |
| 167,2              |          | 0,6     | 0,6     | 0,6     |         | 5,8     |         | 55,7    |
| 167,7              | 59,0     | 109,5   | 56,9    | 69,4    | 1,4     |         | 50,1    |         |
| 168,2              |          |         |         | 0,9     |         |         |         |         |
| 168,7              |          |         | 0,7     |         |         | 2,9     |         | 48,3    |
| 169,2              | 55,8     | 97,3    |         | 31,9    | 2,6     |         | 43,4    |         |
| 169,7              |          | 1,4     | 25,3    |         |         |         |         |         |
| 172,2              |          |         |         |         |         | 1,6     |         | 14,3    |
| 172,7              | 16,0     | 21,6    |         | 11,2    | 0,9     |         | 13,5    |         |
| 173,7              |          |         |         |         |         |         |         |         |
| 174,7              |          |         |         |         | 0,7     | 1,1     | 10,6    | 11,0    |
| 175,2              | 11,6     | 3,4     | 5,9     | 1,1     |         | 0,3     |         |         |
| 177,2              | 1,1      | 3,0     | 0,9     | 1,2     |         |         |         |         |
| 179,7              |          |         |         |         | 3,7     |         |         |         |
| 180,7              |          |         |         |         |         |         |         | 4,0     |
| 181,2              |          |         |         | 14,0    | 2,8     | 3,6     | 9,6     | 5,2     |
| 181,7              | 13,1     | 64,1    | 16,0    |         | 0,8     |         |         |         |
| 182,7              |          |         |         |         |         |         |         |         |
| 183,7              |          |         | 1,2     |         |         |         | 1,9     | 8,9     |
| 184,2              | 12,1     | 46,7    |         | 1,8     | 2,5     | 1,5     | 6,9     |         |
| 185,2              |          |         |         |         |         |         |         |         |
| 185,7              |          |         |         |         | 1,4     | 1,1     | 2,2     | 5,0     |
| 186,2              | 12,0     | 13,0    | 1,0     | 5,8     |         |         | 3,1     |         |

|       |     |     |      |      |      |     |      |     |
|-------|-----|-----|------|------|------|-----|------|-----|
| 186,7 |     |     | 3,2  |      |      |     |      |     |
| 187,2 |     |     | 1,2  |      |      |     |      | 1,4 |
| 187,7 | 2,2 |     | 1,3  | 2,0  |      |     | 1,0  |     |
| 188,7 |     |     |      |      |      |     |      |     |
| 189,7 | 2,1 | 2,5 |      | 1,4  |      |     | 1,6  |     |
| 192,7 |     |     |      |      | 14,1 | 8,7 | 6,6  | 4,8 |
| 193,7 | 6,5 |     | 13,1 | 7,0  |      |     |      |     |
| 194,7 |     | 0,0 |      |      |      |     |      |     |
| 197,2 | 2,2 | 6,6 | 3,4  | 2,1  |      |     |      |     |
| 200,2 | 1,9 | 4,2 |      | 2,0  |      |     | 0,9  |     |
| 201,2 | 1,2 | 1,8 |      |      |      |     |      |     |
| 243,2 |     |     |      |      |      |     |      |     |
| 244,2 | 5,5 | 3,7 |      | 14,7 |      |     | 13,5 |     |

| 0305-05                  | 0305-06        | 0324-13    | 0324-14    | 0412-05 | 0412-06 | 0502-32    | 0502-33    | 1120-25    |
|--------------------------|----------------|------------|------------|---------|---------|------------|------------|------------|
|                          |                | 28,9       | 14,1       | 10,0    | 5,0     | 17,2       | 8,3        |            |
| 9,8<br>1,1               | 8,5<br>0,8     | 8,8        | 5,0        |         |         |            |            | 10,9       |
|                          |                |            |            | 2,2     | 2,5     |            |            |            |
| 1,1                      |                | 4,8        | 2,0        |         |         | 4,6        | 1,4        |            |
|                          |                | 1,3        |            |         |         | 1,4        |            | 1,0        |
|                          |                | 3,3        | 1,0        | 0,5     | 0,5     | 2,2        |            | 3,3        |
| 1,1<br>3,7<br>1,1<br>3,2 | 1,5<br><br>2,7 | 1,0<br>1,7 | 0,8<br>1,9 |         |         | 0,7        | 0,7        |            |
|                          |                | 2,7        | 1,2        | 4,3     | 5,0     | 2,7<br>2,0 | 7,3<br>0,6 | 28,8       |
| 2,4<br>0,5               |                |            | 0,8        | 2,7     | 3,5     | 5,2        | 1,9        | 3,6        |
|                          |                | 4,5        | 3,1        | 3,1     | 3,1     | 11,1       | 3,3        | 6,9        |
| 6,2                      | 3,6            |            | 5,1        | 0,9     | 1,0     | 2,6        | 3,3        | 3,0        |
|                          |                | 1,2        |            | 2,3     | 2,4     | 1,1<br>1,1 |            | 8,9        |
| 41,6                     | 28,2           |            |            |         |         |            |            | 0,7        |
|                          |                |            | 1,6        |         |         | 40,1       | 31,5       | 105,6      |
| 43,4                     | 31,7           | 1,0        |            | 25,1    | 28,4    | 0,6        |            |            |
|                          |                |            |            |         |         | 17,2       | 23,5       | 85,3       |
| 14,5                     | 12,3           |            |            |         |         |            |            |            |
|                          |                |            | 0,8        | 8,3     | 9,7     | 3,9        |            | 20,7       |
|                          |                |            |            |         |         |            |            | 16,8       |
| 0,8<br>11,8              | 0,8<br>6,9     |            |            |         |         | 1,2<br>3,3 |            | 0,0<br>1,2 |
|                          |                |            |            |         |         |            |            | 20,7       |
| 1,0<br>12,7              | 7,2            | 2,0        |            | 4,5     | 5,1     |            |            |            |
|                          |                |            |            |         |         |            |            | 16,3       |
| 19,1                     | 7,2<br>1,7     |            | 1,8        |         |         | 28,0       |            |            |
|                          |                | 2,7        |            | 4,4     | 5,2     |            |            | 1,1<br>2,9 |



| 1120-26 | Number | Average | Min | Max   | s.dev |
|---------|--------|---------|-----|-------|-------|
| 9,4     | 6      | 13,9    | 5,0 | 28,9  | 8,5   |
|         | 10     | 13,0    | 7,6 | 21,4  | 5,2   |
|         | 8      | 2,6     | 0,3 | 8,8   | 2,9   |
| 0,6     | 6      | 1,8     | 1,0 | 2,5   | 0,6   |
|         | 5      | 2,8     | 1,1 | 4,8   | 1,8   |
|         | 7      | 2,9     | 0,6 | 5,8   | 1,8   |
|         | 5      | 1,4     | 1,0 | 2,0   | 0,4   |
|         | 5      | 1,8     | 0,9 | 3,3   | 1,0   |
|         | 6      | 1,6     | 0,5 | 3,3   | 1,1   |
|         | 6      | 1,3     | 0,8 | 1,9   | 0,5   |
|         | 10     | 1,7     | 0,8 | 3,7   | 0,9   |
|         | 7      | 1,0     | 0,5 | 1,9   | 0,5   |
| 7,1     | 6      | 3,0     | 0,7 | 5,4   | 1,5   |
|         | 12     | 7,6     | 1,2 | 28,8  | 8,5   |
|         | 8      | 0,9     | 0,5 | 2,0   | 0,5   |
| 0,7     | 10     | 2,9     | 0,5 | 5,0   | 1,3   |
|         | 7      | 2,2     | 0,5 | 5,2   | 1,8   |
|         | 10     | 4,4     | 0,7 | 6,9   | 2,1   |
| 0,3     | 6      | 4,7     | 3,1 | 11,1  | 3,2   |
|         | 10     | 3,8     | 0,6 | 7,0   | 1,8   |
|         | 10     | 3,8     | 0,3 | 8,9   | 3,1   |
|         | 5      | 1,6     | 0,9 | 2,4   | 0,7   |
|         | 5      | 1,1     | 0,4 | 2,2   | 0,7   |
|         | 7      | 19,0    | 0,6 | 55,7  | 22,8  |
| 8,5     | 8      | 57,6    | 1,4 | 109,5 | 39,2  |
|         | 4      | 18,5    | 0,9 | 40,1  | 20,3  |
|         | 9      | 20,2    | 0,6 | 48,3  | 19,3  |
| 8,0     | 7      | 46,3    | 2,6 | 97,3  | 36,1  |
|         | 4      | 16,8    | 1,4 | 25,3  | 10,9  |
|         | 4      | 10,7    | 1,6 | 14,5  | 6,1   |
| 1,5     | 7      | 12,2    | 0,9 | 21,6  | 8,4   |
|         | 4      | 5,7     | 0,8 | 9,7   | 4,1   |
|         | 5      | 8,0     | 0,7 | 16,8  | 7,0   |
| 0,6     | 6      | 3,8     | 0,3 | 11,6  | 4,4   |
|         | 5      | 1,2     | 0,0 | 3,0   | 1,1   |
|         | 5      | 1,5     | 0,8 | 3,7   | 1,2   |
|         | 4      | 6,5     | 3,3 | 11,8  | 3,9   |
|         | 6      | 9,3     | 2,8 | 20,7  | 7,0   |
|         | 5      | 18,9    | 0,5 | 64,1  | 26,2  |
| 0,5     | 4      | 3,1     | 1,0 | 5,1   | 2,0   |
|         | 5      | 6,4     | 1,2 | 12,7  | 4,9   |
|         | 8      | 11,0    | 0,4 | 46,7  | 15,5  |
| 0,4     | 4      | 14,0    | 1,8 | 28,0  | 11,8  |
|         | 9      | 2,8     | 1,1 | 5,2   | 1,7   |
|         | 6      | 6,3     | 1,0 | 13,0  | 5,1   |

|     |   |     |     |      |     |
|-----|---|-----|-----|------|-----|
| 1,0 | 5 | 2,9 | 0,5 | 8,5  | 3,2 |
|     | 9 | 1,6 | 0,3 | 4,2  | 1,1 |
|     | 7 | 1,4 | 0,9 | 2,2  | 0,5 |
|     | 4 | 0,8 | 0,6 | 0,9  | 0,2 |
|     | 5 | 1,7 | 1,0 | 2,5  | 0,6 |
|     | 6 | 6,5 | 1,0 | 14,1 | 4,5 |
|     | 6 | 7,2 | 1,0 | 13,2 | 5,2 |
|     | 4 | 1,5 | 0,0 | 3,0  | 1,2 |
|     | 5 | 3,2 | 1,9 | 6,6  | 2,0 |
|     | 6 | 1,6 | 0,2 | 4,2  | 1,4 |
|     | 4 | 2,6 | 0,6 | 6,9  | 2,9 |
|     | 4 | 4,3 | 0,3 | 8,9  | 4,4 |
|     | 5 | 8,6 | 3,7 | 14,7 | 5,1 |
