# Supplementary material for: A novel approach to evaluation of adsorbents for sampling indoor volatile organic compounds associated with symptom reports
Source: Royal Society of Chemistry journal article supplement (doi:10.1039/b808654k), 2008-01-01
Supplement: tab_s3.pdf [file tab_s3.pdf]

|       |     |     |      |      |     |      |      |      |
|-------|-----|-----|------|------|-----|------|------|------|
| 224,7 |     |     |      |      |     | 6,3  | 6,7  |      |
| 226,2 |     |     |      |      |     |      | 7,1  | 6,6  |
| 226,7 |     |     |      | 7,0  |     |      |      |      |
| 241,2 | 6,2 | 7,0 |      | 6,6  |     |      | 7,5  |      |
| 243,2 |     |     |      |      |     | 10,3 | 15,9 | 16,8 |
| 243,7 | 7,4 | 8,4 | 24,2 | 69,2 | 9,9 |      |      |      |
| 245,7 |     |     |      |      |     |      |      |      |
| 251,7 |     |     |      |      |     |      | 6,9  | 7,6  |
| 252,2 | 6,5 | 7,0 |      | 6,1  |     |      |      |      |
| 257,7 | 6,4 |     |      |      |     |      | 9,4  | 7,5  |
| 258,2 |     | 7,2 |      | 6,8  |     |      |      |      |
| 259,7 |     |     |      |      |     |      | 7,0  |      |
| 278,7 |     |     | 6,3  | 6,0  |     |      |      |      |

| 0305-63 | 0305-64 | 0324-31 | 0324-33 | 0410-05 | 0410-06 | 0502-05 | 0502-06 | 1211-18 |
|---------|---------|---------|---------|---------|---------|---------|---------|---------|
| 11,3    | 30,3    |         |         |         |         |         |         |         |
| 7,5     | 17,4    |         |         |         |         |         |         |         |
| 6,8     | 12,4    |         |         |         |         |         |         | 7,6     |
| 14,5    | 24,3    | 6,7     | 6,3     |         |         |         |         | 6,2     |
| 6,0     | 13,5    |         |         |         |         |         |         | 7,2     |
| 6,5     |         | 6,3     |         | 6,5     |         |         |         | 6,3     |
|         | 7,6     |         |         |         |         |         |         |         |
| 6,6     | 14,3    |         |         |         |         |         |         | 6,0     |
| 7,4     |         |         |         |         |         |         |         | 7,4     |
| 5,7     | 18,7    | 5,7     |         | 6,2     | 6,4     | 0,5     |         | 7,0     |
|         | 28,0    |         |         |         |         |         |         | 12,6    |
| 9,8     |         |         |         |         |         |         |         |         |
|         | 10,3    | 7,5     | 6,8     | 8,5     | 7,3     | 1,4     | 1,0     |         |
| 7,1     | 15,0    |         |         |         |         |         |         | 6,6     |
|         | 11,5    | 6,6     |         | 6,8     |         | 0,7     | 0,5     |         |
|         | 30,4    |         |         | 13,8    | 6,2     | 0,6     |         |         |
| 10,6    |         |         |         |         |         |         |         | 15,0    |
|         |         | 12,1    | 5,8     | 12,9    | 8,0     | 1,0     | 0,8     |         |
|         | 13,4    |         |         |         |         |         |         | 11,6    |
| 6,5     | 16,8    | 10,1    |         | 15,3    | 7,0     |         |         | 6,9     |
| 7,4     | 20,1    |         |         | 8,3     |         |         |         | 8,5     |
|         |         |         |         | 10,2    |         |         |         | 7,2     |
|         | 6,7     |         |         | 8,9     |         |         |         | 6,3     |
|         | 8,7     |         |         | 17,8    |         |         |         | 7,2     |
|         | 41,9    |         |         | 90,7    | 8,7     | 2,1     |         |         |
| 28,7    |         |         |         |         |         |         |         | 31,2    |
|         |         | 19,1    | 7,0     | 69,3    | 15,6    | 3,6     | 2,7     |         |
|         | 6,7     |         |         | 12,1    |         |         |         | 6,3     |
| 6,6     | 7,0     |         |         |         |         |         |         | 6,4     |
| 6,4     | 7,8     |         |         | 7,6     |         |         |         |         |
| 30,8    | 23,6    |         |         | 13,0    | 6,4     | 1,1     |         |         |
|         |         |         |         |         |         |         |         | 22,6    |
|         |         |         |         | 83,6    | 21,3    | 3,7     | 2,0     |         |
| 6,5     | 7,1     |         |         |         |         |         |         |         |
| 5,7     |         |         |         | 9,0     | 6,5     |         |         |         |
|         |         |         |         | 6,5     | 6,2     | 0,7     |         |         |
| 8,8     | 7,7     |         |         |         |         |         |         | 6,7     |
|         |         | 5,9     |         | 9,0     | 6,7     | 1,0     |         |         |
| 6,7     | 6,9     |         |         |         |         |         |         | 6,5     |
| 6,6     | 5,9     |         |         |         |         |         |         | 6,0     |
| 7,4     | 6,0     |         |         | 6,5     | 7,2     | 0,9     |         |         |
|         |         |         |         | 6,7     | 5,9     | 0,8     |         | 5,7     |
| 7,1     |         | 7,0     |         | 7,8     | 6,7     | 1,6     |         |         |

|      |      |      |     |      |      |     |      |
|------|------|------|-----|------|------|-----|------|
| 7,4  | 6,9  |      |     | 6,5  |      | 2,0 |      |
| 9,6  | 6,5  |      |     |      |      |     |      |
|      |      |      |     | 6,1  |      | 1,0 | 7,3  |
| 9,4  |      |      |     |      |      |     | 7,3  |
|      | 13,7 | 5,9  | 6,2 |      | 5,9  | 1,1 |      |
| 25,7 |      |      |     |      |      |     | 22,7 |
|      |      | 10,6 | 8,1 | 11,6 | 10,0 |     |      |
| 13,8 | 9,5  |      |     |      |      |     |      |
|      |      |      |     |      |      |     | 10,3 |
| 9,5  | 8,0  |      |     |      |      |     |      |
|      |      |      |     |      |      |     | 7,8  |
| 9,3  |      |      |     |      |      | 0,9 | 7,5  |
|      |      |      |     |      |      |     | 7,0  |

| 1211-27 | Number | Average | Min | Max  | Sev  |
|---------|--------|---------|-----|------|------|
|         | 4      | 14,4    | 7,7 | 30,3 | 10,8 |
|         | 4      | 12,3    | 7,5 | 17,4 | 4,1  |
| 7,4     | 5      | 8,3     | 6,8 | 12,4 | 2,3  |
| 6,6     | 12     | 9,5     | 6,2 | 24,3 | 5,3  |
| 6,3     | 7      | 7,1     | 5,6 | 13,5 | 2,9  |
| 6,4     | 6      | 6,5     | 6,3 | 7,2  | 0,4  |
|         | 6      | 6,6     | 5,9 | 7,6  | 0,7  |
| 6,4     | 6      | 8,1     | 6,0 | 14,3 | 3,2  |
| 7,1     | 9      | 6,9     | 5,9 | 7,8  | 0,6  |
| 6,1     | 13     | 6,6     | 0,5 | 18,7 | 4,0  |
| 14,1    | 5      | 15,0    | 5,5 | 28,0 | 8,2  |
|         | 8      | 7,6     | 6,2 | 9,8  | 1,4  |
|         | 7      | 6,1     | 1,0 | 10,3 | 3,5  |
| 6,8     | 8      | 7,9     | 6,4 | 15,0 | 2,9  |
|         | 5      | 5,2     | 0,5 | 11,5 | 4,6  |
|         | 7      | 11,7    | 0,6 | 30,4 | 9,4  |
| 15,9    | 8      | 10,6    | 6,8 | 15,9 | 3,3  |
|         | 6      | 6,8     | 0,8 | 12,9 | 5,2  |
| 15,9    | 7      | 10,0    | 6,8 | 15,9 | 3,6  |
| 7,2     | 8      | 9,6     | 6,5 | 16,8 | 4,1  |
| 8,9     | 10     | 9,1     | 5,8 | 20,1 | 4,1  |
| 8,7     | 5      | 7,7     | 6,1 | 10,2 | 1,7  |
| 7,6     | 4      | 7,4     | 6,3 | 8,9  | 1,1  |
| 7,5     | 5      | 9,5     | 6,3 | 17,8 | 4,7  |
|         | 5      | 31,0    | 2,1 | 90,7 | 36,8 |
| 55,6    | 10     | 24,9    | 9,4 | 55,6 | 13,3 |
|         | 6      | 19,5    | 2,7 | 69,3 | 25,3 |
| 9,5     | 4      | 8,6     | 6,3 | 12,1 | 2,7  |
| 7,6     | 4      | 6,9     | 6,4 | 7,6  | 0,5  |
| 7,4     | 4      | 7,3     | 6,4 | 7,8  | 0,6  |
|         | 8      | 16,2    | 1,1 | 30,8 | 10,4 |
| 36,7    | 7      | 16,9    | 8,7 | 36,7 | 10,2 |
|         | 4      | 27,7    | 2,0 | 83,6 | 38,3 |
| 8,0     | 5      | 7,2     | 6,5 | 8,0  | 0,6  |
| 6,4     | 4      | 6,9     | 5,7 | 9,0  | 1,4  |
|         | 4      | 4,9     | 0,7 | 6,5  | 2,8  |
| 8,1     | 6      | 7,5     | 6,4 | 8,8  | 0,9  |
|         | 4      | 5,7     | 1,0 | 9,0  | 3,4  |
| 8,0     | 6      | 7,2     | 6,5 | 8,2  | 0,7  |
| 7,8     | 5      | 6,6     | 5,9 | 7,8  | 0,8  |
|         | 6      | 5,7     | 0,9 | 7,4  | 2,4  |
|         | 4      | 4,8     | 0,8 | 6,7  | 2,7  |
| 10,9    | 6      | 6,8     | 1,6 | 10,9 | 3,0  |

|      |   |      |     |      |      |
|------|---|------|-----|------|------|
| 7,2  | 7 | 6,1  | 2,0 | 7,4  | 1,9  |
|      | 4 | 7,5  | 6,5 | 9,6  | 1,5  |
| 11,6 | 5 | 6,6  | 1,0 | 11,6 | 3,8  |
| 12,7 | 7 | 8,1  | 6,2 | 12,7 | 2,3  |
|      | 8 | 9,5  | 1,1 | 16,8 | 5,6  |
| 42,3 | 8 | 26,2 | 7,4 | 69,2 | 20,9 |
|      | 4 | 10,1 | 8,1 | 11,6 | 1,5  |
|      | 4 | 9,4  | 6,9 | 13,8 | 3,1  |
| 12,7 | 5 | 8,5  | 6,1 | 12,7 | 2,9  |
|      | 5 | 8,2  | 6,4 | 9,5  | 1,3  |
| 13,6 | 4 | 8,9  | 6,8 | 13,6 | 3,2  |
|      | 4 | 6,2  | 0,9 | 9,3  | 3,6  |
| 9,7  | 4 | 7,3  | 6,0 | 9,7  | 1,7  |
