# Supplementary material for: A novel approach to evaluation of adsorbents for sampling indoor volatile organic compounds associated with symptom reports
Source: Royal Society of Chemistry journal article supplement (doi:10.1039/b808654k), 2008-01-01
Supplement: tab_s4.pdf [file tab_s4.pdf]

**Table S4.** ICC values between different adsorbents including the 50 most common peaks for each adsorbent. In Table B peaks that are found in more than three blanks of an adsorbent are excluded.

a)

| Variables<br>Suggested name by NIST 2002 | Rel RT | ICC values |         |
|------------------------------------------|--------|------------|---------|
|                                          |        | All        | CB-C106 |
| 2-Methyl-pentane                         | 51,2   | 0,324      | 0,106   |
| 2-Methyl-pentane                         | 52,2   | 0,391      | 0,502   |
| Butanal                                  | 56,7   | 0,088      | 0,297   |
| Pentane                                  | 57,7   | 0,048      | 0,099   |
| Ethyl Acetate                            | 61,7   | -0,012     | -0,036  |
| Benzene                                  | 72,7   | 0,094      | -0,099  |
| Benzene                                  | 73,2   | 0,107      | 0,163   |
| 3-Methyl-hexane                          | 75,7   | 0,738      | 0,693   |
| Heptane                                  | 81,7   | 0,6663     | 0,383   |
| Toluene                                  | 100,2  | 0,498      | 0,546   |
| Octane                                   | 107,2  | 0,027      | -0,089  |
| Hexanal                                  | 107,7  | 0,233      | -0,022  |
| Tetrachloroethylene                      | 110,7  | 0,236      | 0,069   |
| Furfural                                 | 116,2  | 0,037      | 0,03    |
| Ethylbenzene                             | 122,7  | 0,171      | 0,521   |
| Ethylbenzene                             | 123,2  | 0,082      | -0,054  |
| 1,3-Dimethyl-benzene                     | 124,7  | 0,296      | 0,204   |
| Styrene                                  | 129,7  | 0,679      | 0,712   |
| 1,2-Dimethyl-benzene                     | 130,2  | 0,152      | 0,063   |
| Heptanal                                 | 130,7  | 0,488      | 0,487   |
| $\alpha$ -Pinene                         | 139,2  | 0,557      | 0,53    |
| $\alpha$ -Pinene                         | 139,7  | 0,482      | 0,249   |
| Camphene                                 | 142,7  | 0,246      | 0,142   |
| Benzaldehyde                             | 144,2  | 0,433      | 0,367   |
| Benzaldehyde                             | 144,7  | 0,723      | 0,733   |
| Benzaldehyde                             | 145,2  | 0,701      | 0,649   |
| 1,3,5-Trimethyl-benzene                  | 145,7  | 0,717      | 0,77    |
| Phenol                                   | 146,7  | 0,187      | 0,104   |
| 4-Methyl-bicyclo[3.1.0]hexane            | 147,7  | 0,168      | 0,108   |
| 6-Methyl-5-hepten-2-one                  | 148,2  | 0,289      | 0,419   |
| $\beta$ -Myrcene                         | 148,7  | 0,685      | 0,545   |
| Decane                                   | 149,7  | 0,332      | 0,132   |
| Decane                                   | 150,2  | 0,476      | 0,164   |
| 1,2,3-Trimethyl-benzene                  | 150,7  | 0,183      | -0,011  |
| Octanal                                  | 151,2  | 0,39       | 0,302   |
| 1-Ethenyl-2-methyl-benzene               | 151,7  | 0,418      | 0,114   |
| 3-Carene                                 | 154,2  | 0,132      | 0,044   |
| 1-Hexanol, 2-ethyl-                      | 155,7  | 0,67       | 0,531   |
| 1-Methyl-2-(1-Methylethyl)-Benzene       | 156,2  | 0,04       | -0,251  |
| 1-Methyl-2-(1-Methylethyl)-Benzene       | 156,7  | 0,068      | 0,06    |
| D-Limonene                               | 157,2  | 0,849      | 0,753   |
| Eucalyptol                               | 158,2  | 0,702      | 0,459   |

|                                                      |        |        |        |
|------------------------------------------------------|--------|--------|--------|
| 2-Hydroxy-benzaldehyde                               | 161,2  | -0,163 | 0,216  |
| Acetophenone                                         | 164,7  | 0,358  | 0,197  |
| 2-Methyl-benzaldehyde                                | 165,2  | 0,037  | -0,014 |
| 1-Phenyl-1-butene                                    | 167,2  | -0,017 | -0,019 |
| Undecane                                             | 167,7  | -0,056 | -0,058 |
| 1-Methyl-4-(1-methylethenyl)-benzene                 | 168,2  | -0,066 | -0,11  |
| 1-Methyl-4-(1-methylethenyl)-benzene                 | 168,7  | 0,271  | 0,031  |
| Nonanal                                              | 169,2  | 0,313  | 0,243  |
| 1,3-Diethenyl-benzene                                | 174,7  | -0,031 | -0,152 |
| Octanoic Acid                                        | 177,7  | 0,072  | 0,079  |
| Octanoic Acid                                        | 178,2  | 0,061  | 0,1    |
| 5-Methyl-2-(1-methylethyl)-cyclohexanone             | 179,7  | 0,327  | 0,162  |
| (2-Methyl-1-butenyl)-benzene                         | 181,2  | 0,018  | -0,006 |
| 5-Methyl-2-(1-methylethyl)-cyclohexanol              | 182,2  | 0,164  | -0,092 |
| Dodecane                                             | 183,7  | 0,082  | 0,039  |
| Dodecane                                             | 184,2  | -0,006 | 0      |
| Decanal                                              | 185,7  | 0,092  | -0,028 |
| Naphthalene                                          | 186,2  | 0,132  | 0,076  |
| Naphthalene                                          | 186,7  | 0,449  | 0,159  |
| Methenamine                                          | 192,7  | -0,006 | -0,01  |
| Nonanoic acid                                        | 193,2  | 0,238  | 0,191  |
| Phthalic anhydride                                   | 205,7  | 0,077  | -0,205 |
| Phthalic anhydride                                   | 206,2  | 0,217  | 0,493  |
| Phthalic anhydride                                   | 207,2  | 0,273  | 0,195  |
| 1-[4-(1-Methylethenyl)phenyl]-ethanone               | 211,2  | 0,295  | 0,034  |
| 1-[4-(1-Methylethenyl)phenyl]-ethanone               | 211,7  | 0,31   | 0,223  |
| Tetradecane                                          | 212,2  | 0,229  | 0,305  |
| 1-Methyl-4-(1-methylethyl)-1,3-cyclohexadiene        | 220,2  | 0,052  | -0,048 |
| 6,10-Dimethyl- 5,9-Undecadien-2-one                  | 221,7  | 0,414  | 0,541  |
| Dimethyl phthalate                                   | 223,2  | 0,01   | -0,055 |
| Dimethyl phthalate                                   | 223,7  | 0,36   | 0,664  |
| Long aliphate 1                                      | 226,2  | 0,194  | -0,12  |
| Butylated Hydroxyanisole                             | 226,7  | 0,249  | 0,107  |
| Long aliphate 2                                      | 227,2  | -0,036 | 0,265  |
| 1-(6,6-Dimethylbicyclo[3.1.0]hex-2-en-2-yl)-ethanone | 227,7  | 0,21   | -0,132 |
| 1-Chloro hexadecane                                  | 231,7  | 0,139  | -0,049 |
| Long aliphate 3                                      | 232,2  | 0,231  | 0,107  |
| Long aliphate 4                                      | 241,7  | 0,275  | 0,211  |
| 2,2,4-Trimethyl-pentanoic acid                       | 243,7  | 0,095  | -0,043 |
| Long aliphate 5                                      | 278    | 0,105  | -0,109 |
| 1-Chloro-heptacosane                                 | 284    | 0,454  | 0,29   |
| Long aliphate 5                                      | 301    | 0,68   | 0,658  |
| Long aliphate 6                                      | 312    | 0,192  | 0,015  |
|                                                      | Median | 0,229  | 0,108  |
|                                                      | Min    | -0,163 | -0,251 |
|                                                      | Max    | 0,849  | 0,77   |

|        |          | b)                 |                                            |         |        |
|--------|----------|--------------------|--------------------------------------------|---------|--------|
| CB-TTA | C106-TTA | Variable<br>Rel RT | ICC values, without peaks detected in more |         |        |
|        |          |                    | All                                        | CB-C106 | CB-TTA |
| 0,89   | 0,187    | 51,2               | 0,324                                      | 0,106   | 0,89   |
| 0,364  | 0,269    | 52,2               | 0,391                                      | 0,502   | 0,364  |
| -0,176 | -0,038   |                    |                                            |         |        |
| -0,138 | 0,022    |                    |                                            |         |        |
| 0,399  | -0,052   |                    |                                            |         |        |
| -0,078 | 0,318    | 72,7               | 0,094                                      | -0,099  | -0,078 |
| 0,106  | 0,084    |                    |                                            |         |        |
| 0,71   | 0,815    | 75,7               | 0,738                                      | 0,693   | 0,71   |
| 0,459  | 0,326    |                    |                                            |         |        |
| 0,638  | 0,635    |                    |                                            |         |        |
| 0,085  | 0,075    |                    |                                            |         |        |
| 0,496  | 0,221    |                    |                                            |         |        |
| 0,123  | 0,388    | 110,7              | 0,236                                      | 0,069   | 0,123  |
| 0,47   | 0,313    | 116,2              | 0,037                                      | 0,03    | 0,47   |
| -0,03  | -0,059   | 122,7              | 0,171                                      | 0,521   | -0,03  |
| -0,027 | 0,212    |                    |                                            |         |        |
| 0,25   | 0,374    |                    |                                            |         |        |
| 0,633  | 0,67     |                    |                                            |         |        |
| -0,033 | 0,308    |                    |                                            |         |        |
| 0,571  | 0,408    |                    |                                            |         |        |
| 0,438  | 0,662    | 139,2              | 0,557                                      | 0,53    | 0,438  |
| 0,934  | 0,297    | 139,7              | 0,482                                      | 0,249   | 0,934  |
| 0,384  | 0,214    | 142,7              | 0,246                                      | 0,142   | 0,384  |
| 0,561  | 0,403    |                    |                                            |         |        |
| 0,665  | 0,754    |                    |                                            |         |        |
| 0,707  | 0,74     |                    |                                            |         |        |
| 0,655  | 0,718    | 145,7              | 0,717                                      | 0,77    | 0,655  |
| 0,13   | 0,258    | 146,7              | 0,187                                      | 0,104   | 0,13   |
| 0,34   | 0,043    |                    |                                            |         |        |
| 0,386  | 0,118    | 148,2              | 0,289                                      | 0,419   | 0,386  |
| 0,653  | 0,824    |                    |                                            |         |        |
| 0,271  | 0,562    | 149,7              | 0,332                                      | 0,132   | 0,271  |
| 0,336  | 0,812    | 150,2              | 0,476                                      | 0,164   | 0,336  |
| 0,389  | 0,292    |                    |                                            |         |        |
| 0,415  | 0,44     |                    |                                            |         |        |
| 0,747  | 0,436    |                    |                                            |         |        |
| 0,222  | 0,064    | 154,2              | 0,132                                      | 0,044   | 0,222  |
| 0,618  | 0,807    | 155,7              | 0,67                                       | 0,531   | 0,618  |
| -0,134 | 0,599    | 156,2              | 0,04                                       | -0,251  | -0,134 |
| 0,052  | 0,235    | 156,7              | 0,068                                      | 0,06    | 0,052  |
| 0,855  | 0,919    |                    |                                            |         |        |
| 0,848  | 0,734    |                    |                                            |         |        |

|        |        |        |        |        |        |
|--------|--------|--------|--------|--------|--------|
| -0,061 | -0,432 | 161,2  | -0,163 | 0,216  | -0,061 |
| 0,401  | 0,44   |        |        |        |        |
| 0,136  | -0,146 |        |        |        |        |
| 0,513  | -0,019 |        |        |        |        |
| 0,116  | -0,058 |        |        |        |        |
| 0,393  | -0,157 |        |        |        |        |
| 0,158  | 0,479  |        |        |        |        |
| 0,299  | 0,383  |        |        |        |        |
| 0,322  | -0,257 |        |        |        |        |
| 0,193  | -0,076 | 177,7  | 0,072  | 0,079  | 0,193  |
| 0,082  | 0,035  | 178,2  | 0,061  | 0,1    | 0,082  |
| 0,115  | 0,522  |        |        |        |        |
| 0,113  | 0,039  |        |        |        |        |
| 0,267  | 0,226  | 182,2  | 0,164  | -0,092 | 0,267  |
| 0,283  | 0,08   |        |        |        |        |
| 0,26   | -0,012 |        |        |        |        |
| 0,446  | -0,27  |        |        |        |        |
| 0,063  | 0,195  |        |        |        |        |
| 0,187  | 0,749  |        |        |        |        |
| -0,049 | 0      |        |        |        |        |
| 0,42   | 0,25   |        |        |        |        |
| 0,264  | -0,085 |        |        |        |        |
| -0,041 | 0,386  | 206,2  | 0,217  | 0,493  | -0,041 |
| 0,395  | 0,156  | 207,2  | 0,273  | 0,195  | 0,395  |
| 0,317  | 0,384  | 211,2  | 0,295  | 0,034  | 0,317  |
| 0,388  | 0,274  | 211,7  | 0,31   | 0,223  | 0,388  |
| 0,089  | 0,265  | 212,2  | 0,229  | 0,305  | 0,089  |
| 0,051  | 0,059  | 220,2  | 0,052  | -0,048 | 0,051  |
| 0,413  | 0,357  | 221,7  | 0,414  | 0,541  | 0,413  |
| -0,246 | 0,246  |        |        |        |        |
| 0,275  | 0,341  | 223,7  | 0,36   | 0,664  | 0,275  |
| 0,1    | 0,385  |        |        |        |        |
| 0,345  | 0,228  |        |        |        |        |
| 0,026  | -0,152 | 227,2  | -0,036 | 0,265  | 0,026  |
| 0,208  | 0,261  | 227,7  | 0,21   | -0,132 | 0,208  |
| 0,41   | -0,099 | 231,7  | 0,139  | -0,049 | 0,41   |
| -0,038 | 0,464  | 232,2  | 0,231  | 0,107  | -0,038 |
| 0,064  | 0,486  | 241,7  | 0,275  | 0,211  | 0,064  |
| 0,351  | -0,155 |        |        |        |        |
| 0,367  | 0,062  | 278    | 0,105  | -0,109 | 0,367  |
| 0,625  | 0,308  | 284    | 0,454  | 0,29   | 0,625  |
| 0,741  | 0,639  | 301    | 0,68   | 0,658  | 0,741  |
| 0,573  | -0,181 | 312    | 0,192  | 0,015  | 0,573  |
| 0,322  | 0,265  | Median | 0,2335 | 0,153  | 0,296  |
| -0,246 | -0,432 | Min    | -0,163 | -0,251 | -0,134 |
| 0,934  | 0,919  | Max    | 0,738  | 0,77   | 0,934  |

more than three samples of any blank

C106-TTA

0,187

0,269

0,318

0,815

0,388

0,313

-0,059

0,662

0,297

0,214

0,718

0,258

0,118

0,562

0,812

0,064

0,807

0,599

0,235

-0,432

-0,076

0,035

0,226

0,386

0,156

0,384

0,274

0,265

0,059

0,357

0,341

-0,152

0,261

-0,099

0,464

0,486

0,062

0,308

0,639

-0,181

0,2715

-0,432

0,815
