# Supplementary material for: A novel approach to evaluation of adsorbents for sampling indoor volatile organic compounds associated with symptom reports
Source: Royal Society of Chemistry journal article supplement (doi:10.1039/b808654k), 2008-01-01
Supplement: tab_s5.pdf [file tab_s5.pdf]

**Table S5.** ICC values within different adsorbents including the 30 most common peaks for each adsorbent, and ICC values when data are adjusted for peaks in adjacent rel RT intervals.

| Suggested names                          | Rel RT | Adsorbent |        |       |
|------------------------------------------|--------|-----------|--------|-------|
|                                          |        | C106      | CB     | TTA   |
| 2-Methyl-pentane                         |        | -0,329    | 0,347  |       |
| Pentane                                  | 57,7   | 0,103     |        |       |
| Benzene                                  | 73,2   | 0,663     | 0,468  | 0,631 |
| 3-Methyl-hexane                          | 75,7   |           | 0,824  |       |
| Heptane                                  | 81,7   | 0,334     | 0,488  | 0,58  |
| Toluene                                  | 100,2  | 0,618     | 0,29   | 0,658 |
| Hexanal                                  | 107,7  | 0,054     | 0,136  | 0,612 |
| Tetrachloroethylene                      | 110,7  | 0,393     | 0,09   | 0,126 |
| Compound with very low qualifier         | 112,2  | 0,089     |        |       |
| Ethylbenzene                             | 122,7  |           | 0,341  |       |
| Ethylbenzene                             | 123,2  | 0,182     | 0,331  | 0,194 |
| 1,3-Dimethyl-benzene                     | 124,7  | 0,398     | 0,463  | 0,137 |
| Styrene                                  | 129,7  | 0,371     | 0,695  | 0,084 |
| 1,2-Dimethyl-benzene                     | 130,2  | 0,355     | 0,738  | 0,165 |
| Heptanal                                 | 130,7  | 0,655     | 0,115  | 0,899 |
| alpha-Pinene                             | 139,2  | -0,021    | 0,759  | 0,482 |
| Camphene                                 | 142,7  |           | 0,293  | 0,693 |
| Benzaldehyde                             | 144,2  |           | 0,363  |       |
| Benzaldehyde                             | 144,7  | 0,414     | 0,571  |       |
| Benzaldehyde                             | 145,2  |           | 0,402  |       |
| 1,3,5-Trimethyl-benzene                  | 145,7  |           | 0,056  |       |
| 6-Methyl-5-hepten-2-one                  | 148,2  |           | 0,315  |       |
| beta-Myrcene                             | 148,7  |           | 0,915  | 0,732 |
| Decane                                   | 149,7  |           |        | 0,141 |
| 1,2,3-Trimethyl-benzene                  | 150,7  |           | 0,393  | 0,57  |
| Octanal                                  | 151,2  | 0,229     |        |       |
| 2-Ethyl-1-hexanol                        | 155,7  | 0,195     |        |       |
| 1-Methyl-2-(1-Methylethyl)-Benzene       | 156,2  |           | 0,226  |       |
| 1-Methyl-2-(1-Methylethyl)-Benzene       | 156,7  | 0,22      | 0,829  |       |
| D-Limonene                               | 157,2  | 0,965     | 0,798  | 0,943 |
| Eucalyptol                               | 158,2  |           |        | 0,701 |
| Acetophenone                             | 164,7  | -0,058    |        |       |
| Undecane                                 | 167,7  | 0,905     |        | 0,643 |
| 1-Methyl-4-(1-methylethenyl)-benzene     | 168,7  |           |        | 0,895 |
| 1-Methyl-4-(1-methylethenyl)-benzene     | 169,2  | 0,662     | -0,014 | 0,574 |
| 1,3-Diethenyl-benzene                    | 172,7  | -0,288    |        |       |
| 5-Methyl-2-(1-methylethyl)-cyclohexanone | 179,7  |           |        | 0,828 |
| (2-Methyl-1-butenyl)-benzene             | 181,2  | -0,027    |        |       |
| Dodecane                                 | 183,7  |           |        | 0,132 |
| Dodecane                                 | 184,2  | -0,093    |        |       |
| Decanal                                  | 185,7  |           | -0,043 |       |
| Naphthalene                              | 186,2  | 0,568     |        |       |
| Naphthalene                              | 186,7  | 0,45      |        |       |
| Nonanoic acid                            | 193,2  |           |        | 0,44  |

|                                                       |       |        |        |        |
|-------------------------------------------------------|-------|--------|--------|--------|
| Phthalic anhydride                                    | 205,7 |        | 0,437  |        |
| 1-[4-(1-Methylethenyl)phenyl]-ethanone                | 211,7 |        |        | -0,127 |
| Tetradecane                                           | 214,7 |        |        | 0,405  |
| Nonadecane                                            | 226,2 |        |        | 0,172  |
| Butylated Hydroxyanisole                              | 226,7 | 0,214  |        | -0,16  |
| 1-(6,6-Dimethylbicyclo[3.1.0]-hex-2-en-2-yl)-ethanone | 227,7 |        |        | 0,467  |
| Long aliphate 1                                       | 241,7 | 0,682  |        |        |
| 2,2,4-Trimethyl-pentanoic acid                        | 243,7 |        | -0,073 | 0,552  |
| Long aliphate 2                                       | 278   |        |        | 0,447  |
| 1-Chloro-heptacosane                                  | 284   | 0,889  | 0,267  | 0,971  |
| Long aliphate 3                                       | 312   |        | 0,658  |        |
| Median                                                |       | 0,3445 | 0,363  | 0,552  |
| Min                                                   |       | -0,329 | -0,073 | -0,16  |
| Max                                                   |       | 0,965  | 0,915  | 0,971  |
