# Supplementary material for: A novel approach to evaluation of adsorbents for sampling indoor volatile organic compounds associated with symptom reports
Source: Royal Society of Chemistry journal article supplement (doi:10.1039/b808654k), 2008-01-01
Supplement: tab_s6.pdf [file tab_s6.pdf]

Table S6. Raw data of the most common peaks with Carbopack B ( $\mu\text{g}/\text{m}^3$ ).

| Variable<br>Rel RT | Participant<br>Sample | 2    |      | 9     |       | 17   |      | 52   |       | 54   |      | 61   |      | 62   |      | 9    |
|--------------------|-----------------------|------|------|-------|-------|------|------|------|-------|------|------|------|------|------|------|------|
|                    |                       | A    | B    | A     | B     | A    | B    | A    | B     | A    | B    | A    | B    | A    | B    | A    |
| 73,2               |                       | 19,5 | 18,5 | 14,5  | 17,2  | 18,3 | 16,8 | 22,8 | 22,7  | 12,5 | 13,5 | 17,2 | 15,9 | 27,0 | 42,7 |      |
| 81,7               |                       | 11,4 | 11,0 | 13,3  | 11,7  | 9,7  | 9,2  | 12,0 | 39,7  | 10,9 | 10,7 | 10,6 | 11,3 | 15,7 | 33,2 | 13,9 |
| 100,2              |                       | 31,2 | 28,7 | 20,5  | 21,9  | 22,0 | 16,2 | 33,8 | 61,3  | 22,9 | 20,7 | 21,2 | 19,9 | 20,9 | 61,5 | 24,1 |
| 107,7              |                       | 9,0  |      | 9,0   | 10,4  |      |      | 10,3 | 10,9  |      | 11,7 |      |      |      |      |      |
| 110,7              |                       | 15,1 | 11,6 | 10,0  | 9,5   | 7,8  | 7,2  | 11,6 | 10,8  | 8,9  | 10,2 | 9,1  | 9,1  | 9,7  | 28,1 | 9,3  |
| 122,7              |                       |      |      | 9,2   |       | 8,9  | 8,2  |      |       |      |      |      |      | 9,4  | 15,8 | 10,8 |
| 123,2              |                       | 12,9 | 11,7 |       | 9,4   |      |      | 12,5 | 12,0  | 9,2  | 18,3 | 9,2  | 9,4  |      |      |      |
| 124,7              |                       | 21,2 | 18,7 | 15,1  | 14,0  | 15,1 | 12,5 | 21,5 | 20,4  | 13,6 | 13,4 | 14,6 | 14,7 | 13,8 | 35,4 | 16,4 |
| 129,7              |                       | 28,7 | 20,7 | 28,0  | 29,6  | 28,8 | 29,3 | 12,3 | 20,8  | 10,7 | 12,0 | 10,8 | 10,5 | 17,1 | 18,6 | 63,4 |
| 130,2              |                       | 13,7 | 12,4 | 11,0  | 10,8  | 10,3 | 9,2  | 13,9 | 14,2  | 10,0 | 10,0 | 10,3 | 10,2 | 10,3 | 15,5 | 12,0 |
| 130,7              |                       |      |      | 7,8   |       |      |      |      |       |      |      |      |      |      | 12,3 |      |
| 139,2              |                       | 9,7  | 8,9  | 11,0  | 11,6  | 7,7  | 7,7  | 10,4 |       |      | 9,1  |      | 8,8  |      | 13,1 | 10,3 |
| 142,7              |                       | 9,9  | 9,5  | 8,9   | 8,6   | 8,6  | 7,3  | 10,2 | 10,3  |      | 9,1  |      |      | 8,9  | 13,2 | 9,2  |
| 144,2              |                       |      |      |       |       |      |      | 11,5 | 12,2  |      | 87,1 |      | 8,7  |      |      |      |
| 144,7              |                       | 30,4 | 17,0 | 22,3  | 18,9  | 29,5 | 25,8 | 14,0 | 14,9  | 18,0 |      | 12,9 | 9,8  | 17,9 | 27,2 | 27,5 |
| 145,2              |                       |      |      |       |       |      |      |      |       |      |      |      |      |      |      |      |
| 148,2              |                       | 11,4 | 9,7  | 13,3  | 11,2  | 9,6  | 8,9  | 11,5 | 11,0  |      | 10,0 | 8,3  | 9,3  | 9,2  | 24,0 | 10,0 |
| 148,7              |                       | 9,3  |      | 10,4  | 9,1   |      |      |      |       |      |      |      |      | 9,6  | 9,7  | 9,3  |
| 150,7              |                       | 13,6 | 12,5 | 10,5  | 10,4  | 10,3 | 7,5  | 12,5 | 33,2  | 8,2  | 10,1 | 8,7  | 8,2  | 8,6  | 13,2 | 9,6  |
| 156,2              |                       | 9,9  |      | 14,9  |       | 13,4 | 8,5  |      |       |      | 9,9  | 12,8 |      | 14,8 | 11,4 | 10,0 |
| 156,7              |                       |      | 16,5 |       | 20,4  |      |      |      | 15,0  | 10,4 |      |      | 8,2  |      | 12,6 | 7,9  |
| 157,2              |                       | 28,2 | 20,3 | 143,5 | 128,6 | 19,9 | 21,3 | 34,7 | 17,7  | 14,4 | 24,7 | 17,8 | 19,1 | 29,2 | 70,9 | 67,9 |
| 169,2              |                       | 14,0 | 9,3  | 12,2  | 12,2  |      | 14,4 | 12,9 | 11,3  | 10,8 | 17,8 | 8,6  | 10,3 | 10,7 | 23,4 | 14,8 |
| 185,7              |                       | 9,8  | 9,1  | 8,5   | 7,9   |      | 7,8  | 10,4 | 10,5  | 9,6  | 10,0 |      | 8,2  |      | 13,1 | 11,1 |
| 205,7              |                       | 44,7 | 12,5 | 11,5  | 12,0  | 8,2  | 9,8  | 10,7 | 17,3  | 12,8 | 9,7  |      |      | 13,3 | 10,7 | 22,4 |
| 243,7              |                       | 28,6 | 11,1 | 9,8   |       |      | 8,6  |      | 18,1  |      | 20,4 | 8,6  | 15,2 | 11,7 | 10,6 | 34,7 |
| 284                |                       | 25,7 | 19,3 | 11,0  | 9,7   | 7,7  | 16,6 | 45,3 | 241,8 | 19,8 | 17,8 |      |      | 9,6  | 10,5 | 9,1  |
| 312                |                       | 15,9 | 8,0  |       | 6,3   |      |      | 18,3 | 8,4   | 16,9 | 17,4 | 9,1  | 9,6  |      |      | 8,5  |

| 5    | 112  |      | 123  |      | 126  |       | 145  |       | 148   |      | 155   |      | 168  |       | 171  |       | 17 |
|------|------|------|------|------|------|-------|------|-------|-------|------|-------|------|------|-------|------|-------|----|
| B    | A    | A    | B    | A    | B    | A     | B    | A     | B     | A    | B     | A    | B    | A     | B    | A     |    |
|      |      | 20,6 | 12,1 | 21,6 | 19,5 | 12,5  | 14,2 | 16,2  | 24,4  | 38,3 | 22,4  | 15,3 | 16,8 | 17,3  |      | 27,1  |    |
| 13,1 | 13,5 | 15,2 | 11,1 | 10,9 | 10,7 | 10,2  | 9,1  | 14,0  | 15,4  | 15,9 | 16,5  | 9,2  | 9,0  | 11,2  |      | 13,6  |    |
| 26,7 | 36,8 | 28,7 | 18,6 | 32,9 | 29,9 | 29,0  | 20,8 | 26,1  | 31,6  | 29,8 | 27,2  | 21,2 | 23,0 | 21,6  | 10,7 | 31,1  |    |
|      | 0,0  | 16,6 |      | 8,0  | 8,4  | 8,9   | 7,6  | 10,3  | 12,2  | 7,4  | 11,4  |      |      | 7,9   |      |       |    |
| 8,9  | 24,6 | 12,5 | 7,6  | 9,0  | 8,6  | 8,5   |      | 17,3  | 32,1  | 13,5 | 35,3  | 10,6 | 11,5 | 17,7  |      | 11,5  |    |
| 11,0 | 0,0  | 10,0 |      |      |      |       |      | 11,8  | 13,9  | 18,8 | 13,5  |      | 8,8  | 10,5  |      | 14,3  |    |
|      | 14,6 |      | 8,4  | 11,2 | 10,7 | 10,7  | 8,8  |       | 10,1  |      | 9,8   | 8,5  |      |       |      |       |    |
| 18,3 | 26,4 | 18,6 | 13,1 | 21,2 | 20,3 | 19,1  | 13,1 | 22,9  | 30,1  | 48,3 | 29,8  | 14,1 | 15,7 | 21,3  |      | 28,8  |    |
| 50,6 | 32,9 | 15,7 | 10,1 | 19,6 | 10,6 | 11,1  | 19,3 | 14,6  | 33,8  | 19,7 | 23,0  | 9,3  | 17,3 | 23,3  |      |       |    |
| 14,1 | 17,2 | 10,6 | 8,9  | 12,8 | 12,7 | 12,6  | 10,0 | 14,1  | 16,6  | 23,0 | 16,1  | 9,3  | 10,1 | 12,2  |      | 17,1  |    |
|      | 0,0  | 7,9  |      |      | 8,1  | 9,8   |      | 9,2   | 8,2   |      |       |      |      |       |      |       |    |
| 8,5  | 12,3 | 9,6  | 8,2  | 10,5 | 9,6  | 9,1   | 7,7  | 12,7  | 13,7  |      |       | 7,0  |      |       |      |       |    |
| 11,0 | 11,9 | 8,1  | 7,3  | 16,9 | 9,9  | 9,4   | 7,5  | 8,8   | 9,3   | 9,0  | 8,7   | 7,4  | 7,2  | 7,9   |      |       |    |
|      | 0,0  |      | 8,3  |      |      | 30,0  |      |       | 23,3  | 22,1 | 27,6  |      | 14,1 | 23,7  |      | 25,0  |    |
| 28,1 | 32,5 | 19,7 | 10,4 | 49,7 | 24,3 |       | 17,1 | 18,3  |       |      |       | 12,7 |      |       |      |       |    |
|      | 14,7 |      |      |      |      | 7,6   | 8,3  |       | 9,6   |      | 8,9   | 7,3  | 7,0  | 7,4   |      |       |    |
| 11,1 | 0,0  | 13,5 | 8,3  | 12,4 | 10,5 | 16,8  | 12,0 |       |       | 9,2  | 9,7   | 7,5  | 8,7  | 7,9   |      | 10,6  |    |
| 9,1  | 14,5 | 7,4  | 8,1  | 8,3  | 8,5  | 9,0   |      | 11,1  | 14,9  |      |       |      |      | 7,6   | 7,0  |       |    |
| 13,1 | 12,6 | 9,3  | 9,7  | 14,6 | 11,0 |       |      | 10,9  | 25,7  | 11,3 | 13,7  | 8,9  | 9,3  | 10,2  |      | 12,5  |    |
|      | 0,0  | 8,2  | 7,6  |      |      |       |      |       |       | 27,6 | 10,4  | 22,9 | 34,0 | 31,2  |      | 67,9  |    |
| 42,4 | 10,8 | 8,4  | 8,2  | 16,5 | 9,5  | 15,1  |      | 11,5  | 10,6  |      |       |      |      |       |      |       |    |
| 76,8 | 30,7 | 38,5 | 24,5 | 35,0 | 26,3 | 27,3  | 16,7 | 377,6 | 456,8 | 57,9 | 131,2 | 99,6 | 98,5 | 110,8 | 19,1 | 112,4 |    |
| 9,1  | 21,5 | 15,4 | 11,0 | 12,8 | 22,1 | 147,9 | 10,6 | 12,1  | 15,9  |      |       | 7,1  | 7,3  |       |      |       |    |
| 8,6  | 26,8 | 10,3 | 6,8  | 9,2  | 14,2 | 103,6 | 7,9  |       |       |      |       |      |      |       |      |       |    |
| 16,7 | 0,0  | 12,1 | 8,7  | 9,3  | 16,8 | 13,7  | 13,9 | 8,8   | 14,6  |      |       |      |      |       |      | 10,9  |    |
| 13,0 | 91,0 | 11,3 | 8,6  | 11,7 | 17,8 | 43,0  |      |       |       |      |       |      |      |       |      |       |    |
| 20,4 | 15,0 | 8,5  |      |      | 17,1 | 11,0  |      |       |       | 20,3 | 73,2  | 21,7 | 18,9 |       |      | 11,9  |    |
| 7,1  | 18,2 | 7,2  | 6,5  | 14,7 | 15,6 | 14,7  | 12,1 |       |       |      |       |      |      |       | 5,8  | 9,7   |    |



| 22   | 420  |      |      | 438  |      | 521  |      | 532  |  |
|------|------|------|------|------|------|------|------|------|--|
| B    | A    | B    | A    | B    | A    | B    | A    | B    |  |
|      |      |      |      |      |      |      |      | 6,1  |  |
| 15,1 | 9,8  | 9,9  | 19,9 | 10,5 |      |      | 12,0 | 13,8 |  |
| 25,5 | 20,1 | 18,4 | 29,2 | 25,5 | 25,4 | 29,4 | 14,6 | 14,2 |  |
| 12,4 | 8,8  | 8,7  | 13,2 | 10,6 | 17,1 | 19,2 | 6,5  | 7,4  |  |
|      | 13,1 | 12,1 |      |      | 24,4 | 23,3 | 12,6 | 12,4 |  |
| 9,6  |      | 7,7  | 8,2  | 7,8  | 10,7 | 10,9 | 5,9  | 6,8  |  |
| 19,1 | 9,0  | 10,8 | 7,5  | 8,7  | 13,8 |      | 6,7  | 7,1  |  |
| 9,9  | 8,0  | 8,3  | 8,9  | 8,6  | 11,5 | 11,9 | 6,5  | 6,8  |  |
| 7,6  |      |      | 8,0  |      |      |      |      |      |  |
|      |      |      |      |      |      |      |      | 5,6  |  |
| 22,9 | 11,3 | 13,3 | 14,3 | 12,9 | 19,1 | 16,2 | 9,3  | 10,6 |  |
| 14,0 | 8,3  | 8,7  | 12,2 | 11,0 | 21,4 | 20,9 |      | 7,6  |  |
| 10,1 |      |      | 9,2  | 9,8  | 13,4 | 13,1 |      |      |  |
|      | 8,3  | 8,7  |      |      |      |      | 6,8  | 6,3  |  |
| 8,1  |      |      | 7,6  | 7,6  |      | 11,6 | 21,1 | 9,8  |  |
| 8,4  |      |      | 10,6 | 8,2  |      |      | 10,6 | 5,7  |  |
|      |      | 8,6  |      |      | 14,2 |      |      |      |  |
