# Supplementary material for: A novel approach to evaluation of adsorbents for sampling indoor volatile organic compounds associated with symptom reports
Source: Royal Society of Chemistry journal article supplement (doi:10.1039/b808654k), 2008-01-01
Supplement: tab_s7.pdf [file tab_s7.pdf]

**Table S7.** Raw data of the most common peaks with Chromosorb 106 ( $\mu\text{g}/\text{m}^3$ ).

| Variable | Participant | 2     |       | 9     |      | 17   |       | 52    |       | 54    |       | 61    |       | 6     |
|----------|-------------|-------|-------|-------|------|------|-------|-------|-------|-------|-------|-------|-------|-------|
| Rel RT   | Sample      | A     | B     | A     | B    | A    | B     | A     | B     | A     | B     | A     | B     | A     |
| 52,2     |             | 16,9  | 13,2  | 14,9  | 16,4 | 13,8 | 15,2  | 15,5  | 16,4  | 10,1  | 16,1  |       | 16,8  |       |
| 57,7     |             | 14,4  | 13,6  | 13,5  | 15,1 | 13,3 | 29,0  | 13,9  | 15,3  | 25,1  | 16,9  | 26,4  | 18,0  | 15,6  |
| 73,2     |             | 22,6  | 20,3  | 16,9  | 17,8 |      |       | 19,5  | 20,3  | 23,0  | 21,2  | 19,9  | 21,0  | 23,0  |
| 81,7     |             | 16,2  | 14,1  | 12,8  | 15,4 | 15,0 | 25,4  | 12,9  | 13,8  | 12,7  | 15,9  | 18,5  | 16,0  | 15,8  |
| 100,2    |             | 36,6  | 30,2  | 20,0  | 22,1 | 23,3 | 44,4  | 31,6  | 30,2  | 22,9  | 25,0  | 21,1  | 23,1  | 22,6  |
| 107,7    |             | 12,5  | 13,1  | 10,6  | 11,7 | 14,8 | 34,5  | 12,0  | 11,2  | 11,9  | 15,7  | 10,0  | 14,5  | 12,5  |
| 110,7    |             | 16,9  | 10,7  |       |      |      |       | 11,2  | 12,1  |       |       | 12,9  | 13,2  | 10,8  |
| 112,2    |             | 53,0  | 52,5  | 70,6  | 58,3 | 56,0 | 14,9  | 51,0  | 59,3  | 17,2  | 71,8  | 16,8  | 73,0  | 12,7  |
| 123,2    |             | 13,6  | 13,0  | 10,1  | 10,9 | 10,5 | 17,2  | 13,0  | 13,1  | 11,7  | 11,6  | 15,7  | 11,5  | 11,5  |
| 124,7    |             | 22,9  | 20,2  | 14,7  | 16,2 | 17,8 | 30,0  | 21,0  | 20,6  | 15,3  | 16,7  | 17,0  | 17,0  | 16,7  |
| 129,7    |             | 22,7  | 16,4  | 16,8  | 22,1 | 37,5 | 44,2  | 22,9  | 36,3  | 19,1  | 19,5  | 21,5  | 16,2  | 31,7  |
| 130,2    |             | 13,8  | 12,7  | 10,2  | 11,4 | 10,4 | 15,6  | 13,9  | 13,7  | 10,4  | 10,9  | 10,4  | 11,4  | 11,4  |
| 130,7    |             | 8,3   | 8,4   |       | 7,2  | 6,7  | 12,1  |       |       |       |       | 8,1   | 9,1   | 8,8   |
| 139,2    |             | 10,4  | 10,2  | 25,3  | 11,7 | 8,3  | 12,1  | 10,3  | 9,9   | 9,9   | 9,8   | 9,2   | 20,4  | 17,6  |
| 144,7    |             | 32,3  | 28,1  | 30,5  | 30,0 | 35,3 | 60,6  | 27,2  | 33,2  | 39,0  | 32,0  | 46,0  | 34,7  | 39,8  |
| 151,2    |             | 19,6  | 17,6  | 14,7  | 15,2 | 13,8 | 33,0  | 42,0  | 37,5  | 15,5  | 18,3  | 17,7  | 25,7  |       |
| 155,7    |             | 15,5  | 14,6  | 14,1  | 14,2 | 14,2 | 28,5  | 11,6  | 12,3  | 20,0  | 17,3  | 12,0  | 15,6  | 17,7  |
| 156,7    |             | 10,5  | 11,0  | 10,6  | 17,0 |      | 13,6  | 10,2  | 10,9  | 12,4  | 18,7  | 8,8   | 9,5   | 17,2  |
| 157,2    |             |       |       |       |      | 10,3 | 31,0  |       |       |       |       | 30,2  | 35,2  | 44,8  |
| 164,7    |             | 9,4   | 9,1   | 8,6   | 9,0  | 8,9  | 15,1  | 9,6   | 10,3  | 10,2  | 9,7   | 9,4   | 9,0   | 9,7   |
| 167,7    |             | 132,9 | 122,9 | 111,1 | 91,5 | 93,5 | 128,6 | 156,1 | 115,3 | 116,0 | 133,9 | 120,5 | 116,1 | 129,8 |
| 169,2    |             | 132,6 | 124,5 | 110,8 | 83,2 | 95,5 | 90,0  | 133,8 | 109,7 | 73,9  | 128,2 | 79,0  | 125,0 | 75,2  |
| 172,7    |             | 34,0  | 30,6  | 29,9  | 24,6 | 27,3 | 25,5  | 43,7  | 30,2  | 23,6  | 34,7  | 23,5  | 27,1  | 26,4  |
| 181,2    |             | 39,3  | 20,1  | 39,3  | 27,4 |      |       |       |       | 49,3  | 44,5  | 41,5  | 41,5  | 36,7  |
| 184,2    |             | 34,3  | 31,7  | 32,8  | 25,5 | 28,3 | 27,0  | 32,0  | 31,2  | 29,1  | 38,6  | 26,9  | 31,4  | 29,4  |
| 186,2    |             | 33,4  | 30,7  | 11,9  | 21,5 | 15,5 | 29,0  | 31,8  | 31,4  | 26,1  | 13,8  | 12,7  | 12,8  | 13,1  |
| 186,7    |             | 11,0  | 10,3  | 11,4  | 11,9 | 23,7 | 14,5  |       |       | 13,9  | 12,3  | 12,6  | 11,1  | 10,3  |
| 226,7    |             |       | 8,9   | 8,3   | 7,8  |      |       | 10,4  | 12,0  |       |       | 8,2   | 20,0  | 23,9  |
| 241,7    |             | 9,6   | 11,2  | 10,6  | 12,6 |      |       | 12,4  | 11,4  | 13,3  | 11,1  | 9,6   | 11,1  | 12,4  |
| 284      |             | 17,2  | 12,0  | 13,0  |      |      |       | 26,8  | 23,7  |       |       | 12,8  | 11,2  | 12,9  |

| 2     | 95    |       |       | 112   |      | 123   |       | 126  |       | 145  |       | 148   |       | 155   |       | 168   | 17 |
|-------|-------|-------|-------|-------|------|-------|-------|------|-------|------|-------|-------|-------|-------|-------|-------|----|
|       | B     | A     | B     | A     | B    | A     | B     | A    | B     | A    | B     | A     | B     | A     | B     | A     | A  |
| 8,4   | 22,1  | 8,2   | 17,5  | 31,9  | 13,9 | 13,0  | 11,8  | 12,6 | 14,1  | 12,5 | 13,0  |       | 13,5  |       |       | 11,7  |    |
| 21,0  | 18,6  | 16,7  | 29,8  | 15,3  | 16,9 | 27,1  | 25,3  | 12,2 | 12,1  | 11,7 | 14,8  | 12,5  | 16,1  | 10,6  |       | 21,4  |    |
| 27,2  | 51,5  | 23,5  |       |       | 20,8 | 31,5  |       |      |       |      | 253,4 | 72,4  |       |       | 22,3  | 85,1  |    |
| 22,1  | 28,2  | 15,6  | 20,5  | 26,8  | 16,2 | 23,7  | 15,6  | 13,2 | 11,3  | 10,1 | 18,1  | 14,6  | 21,9  | 15,2  | 10,7  | 19,2  |    |
| 24,1  | 51,7  | 26,6  | 45,2  | 69,5  | 23,0 | 30,9  | 30,5  | 27,9 | 27,7  | 26,0 | 35,1  | 27,5  | 29,7  | 22,0  | 22,1  | 27,7  |    |
| 14,2  | 46,3  | 14,9  | 14,0  | 26,0  | 14,2 | 18,2  | 12,1  | 10,7 | 11,2  | 10,3 | 22,2  | 12,1  | 18,3  | 12,1  | 9,4   | 20,4  |    |
| 12,8  | 27,1  | 13,0  | 28,2  | 47,0  | 11,4 |       | 10,1  | 9,1  |       |      | 636,3 | 166,3 | 124,2 | 106,8 | 29,9  | 211,3 |    |
| 14,2  | 54,6  | 13,0  | 21,3  | 48,2  | 52,1 | 15,9  | 13,2  | 41,3 | 40,1  | 36,1 |       |       |       |       |       | 21,6  |    |
| 14,4  | 16,5  | 14,5  | 21,9  | 29,8  | 10,5 | 12,8  | 15,3  | 11,1 | 10,9  | 10,2 | 221,0 | 32,6  | 26,1  | 25,3  | 24,2  | 40,6  |    |
| 17,8  | 31,8  | 19,7  | 31,2  | 50,2  | 16,4 | 20,6  | 20,4  | 17,3 | 18,7  | 17,5 | 312,9 | 85,5  | 62,8  | 54,6  | 12,1  | 95,0  |    |
| 29,1  | 49,5  | 57,9  | 33,4  | 60,9  | 26,8 | 48,8  | 19,7  | 13,5 | 34,4  | 14,2 |       |       |       |       | 12,4  | 32,9  |    |
| 10,9  | 16,9  | 12,7  | 19,2  | 32,6  | 9,8  | 10,6  | 11,8  | 11,2 | 11,2  | 10,7 | 124,5 | 34,7  | 28,6  | 24,5  |       | 42,3  |    |
| 7,7   | 14,0  | 8,8   | 11,4  |       | 6,6  | 7,3   | 7,9   | 7,3  | 7,0   | 7,0  | 13,0  | 8,8   | 20,6  | 8,0   | 9,6   | 9,6   |    |
| 9,8   | 12,8  | 12,2  | 15,8  | 23,5  | 17,2 | 11,8  | 13,4  | 9,1  | 8,1   | 8,0  |       |       | 12,5  | 10,6  | 24,2  | 12,2  |    |
| 36,9  | 39,7  | 46,9  | 69,6  | 57,4  | 29,7 | 46,5  | 49,3  | 24,3 | 30,8  | 22,8 |       |       |       |       |       | 67,5  |    |
|       | 45,2  | 9,8   | 29,7  | 25,5  | 15,3 | 19,7  | 33,0  | 15,1 | 17,8  | 13,7 |       |       |       |       |       |       |    |
| 15,7  | 23,0  | 17,1  | 19,5  | 16,1  | 12,3 | 17,1  | 27,0  | 11,3 | 11,8  | 11,2 |       |       |       |       | 12,8  |       |    |
| 9,9   | 20,6  | 11,3  | 13,6  | 23,7  | 15,6 | 11,7  | 11,7  | 9,0  | 8,5   | 8,3  | 13,1  | 9,0   | 10,1  | 9,2   |       | 10,1  |    |
| 48,0  | 111,3 | 139,5 |       |       | 32,5 | 11,7  |       |      |       |      | 440,4 | 344,4 | 149,0 | 159,4 | 8,0   | 182,3 |    |
| 9,6   | 12,5  | 10,1  | 14,2  | 11,7  | 7,6  | 8,7   | 10,0  | 7,8  | 9,0   | 7,4  |       |       | 8,7   |       | 8,3   |       |    |
| 110,2 | 119,4 | 112,5 | 165,9 | 194,1 | 87,9 | 112,6 | 111,7 | 91,9 | 138,5 | 87,6 |       |       | 9,0   | 8,7   | 6,6   | 9,1   |    |
| 64,2  | 112,0 | 71,8  | 96,1  | 171,2 | 91,9 | 74,3  | 108,4 | 87,1 | 129,5 | 83,7 |       |       |       |       | 173,4 | 25,9  |    |
| 22,9  | 34,2  | 26,9  | 31,9  | 59,0  | 20,5 | 21,1  | 23,2  | 24,7 | 34,3  | 28,6 |       |       |       |       |       |       |    |
| 32,3  | 29,9  | 36,1  |       |       | 27,9 | 39,5  |       |      | 36,0  | 23,6 | 13,2  | 12,0  | 14,2  | 11,6  | 14,5  | 11,9  |    |
| 22,5  | 33,1  | 28,4  | 32,2  | 67,3  | 23,2 | 26,4  | 31,3  | 26,5 | 41,0  | 24,7 |       |       |       |       | 9,6   | 10,5  |    |
| 11,7  | 12,0  | 11,9  | 36,5  | 33,9  | 9,1  | 19,6  | 56,3  | 23,7 | 29,9  | 25,0 | 8,3   |       |       |       | 7,7   | 8,2   |    |
| 10,1  | 11,7  | 14,0  | 12,7  |       | 13,6 | 25,5  | 13,6  |      | 9,1   |      |       |       |       |       |       | 8,2   |    |
|       | 17,1  |       | 10,6  |       | 18,3 | 7,0   | 8,2   | 9,1  | 6,8   |      |       |       |       |       |       |       |    |
| 9,5   | 11,2  | 9,6   | 12,5  | 11,2  | 9,7  | 7,1   | 9,8   | 11,6 | 8,0   | 8,3  | 14,0  | 21,7  | 19,9  | 17,5  |       | 8,2   |    |
| 10,1  | 11,1  | 9,5   | 15,1  | 12,1  | 8,9  |       | 10,9  | 10,9 | 8,6   | 8,7  | 9,7   | 9,6   | 36,9  | 34,0  | 42,5  | 13,1  |    |

| 71 | 172   |       |       | 176   |       | 181   |       | 214   | 234    |      | 235  |      | 237  |       | 280   |       | 30   |
|----|-------|-------|-------|-------|-------|-------|-------|-------|--------|------|------|------|------|-------|-------|-------|------|
|    | B     | A     | B     | A     | B     | A     | B     | A     | A      | B    | A    | B    | A    | B     | A     | B     | A    |
|    | 9,4   | 17,2  | 15,2  |       | 9,0   | 14,3  | 13,7  | 10,7  |        |      |      |      |      |       |       |       |      |
|    | 11,6  | 18,3  | 15,0  | 12,0  | 12,4  | 14,7  | 14,8  | 11,2  | 15,2   |      | 12,1 | 11,5 | 11,8 | 10,2  | 10,2  | 11,6  |      |
|    | 16,1  | 62,0  | 23,2  | 22,8  | 16,8  | 26,9  | 54,1  |       | 19,4   | 12,0 | 13,5 | 13,2 | 12,8 | 14,4  | 12,6  | 14,2  | 17,7 |
|    | 10,8  | 17,6  | 15,2  | 12,1  | 10,3  | 23,5  | 28,1  | 17,5  | 18,5   | 9,8  |      |      | 10,4 | 13,6  | 17,9  | 10,3  | 12,2 |
|    | 18,9  | 37,7  | 28,4  | 23,3  | 21,7  | 26,1  | 26,9  | 24,9  | 15,9   | 13,9 | 15,8 | 15,5 | 13,6 | 17,1  | 13,2  | 16,2  | 27,8 |
|    | 10,5  | 17,8  | 14,1  | 13,6  | 11,4  | 18,5  | 17,3  |       | 19,5   | 11,4 | 15,4 | 17,6 | 10,2 | 14,3  | 10,5  | 14,2  | 14,5 |
|    | 12,1  | 113,3 | 19,2  | 34,4  | 16,3  | 25,3  | 105,2 | 121,2 | 9,8    |      | 11,2 | 12,0 | 10,1 | 11,1  | 10,8  | 15,0  | 10,4 |
|    |       |       |       |       |       |       |       | 26,7  |        | 8,6  |      |      |      |       |       |       |      |
|    | 9,1   | 27,0  | 23,9  | 9,7   | 9,8   | 23,5  | 23,8  | 62,5  | 34,6   | 8,6  |      |      | 10,3 | 16,1  | 9,9   | 19,8  |      |
|    | 14,2  | 64,7  | 23,6  | 22,3  | 16,6  | 24,5  | 57,9  |       | 11,9   | 10,6 | 12,0 | 12,6 | 11,3 | 12,8  | 10,2  | 13,2  | 14,6 |
|    | 9,6   | 14,7  | 16,1  | 9,2   | 12,7  | 11,5  | 11,1  | 26,8  | 53,5   | 9,5  | 11,3 | 10,7 | 17,4 | 18,3  | 18,2  | 22,6  |      |
|    | 9,1   | 29,1  | 14,4  | 12,2  | 10,1  | 15,1  | 27,3  | 7,9   | 10,6   | 8,8  | 10,6 | 10,6 | 8,2  | 9,0   | 8,8   | 9,6   |      |
|    |       | 9,4   |       | 6,3   |       | 9,5   | 9,9   |       | 9,9    | 8,3  | 9,8  | 9,9  | 7,2  | 7,6   | 7,9   | 9,7   | 19,0 |
|    | 17,6  | 18,5  | 25,1  | 11,5  | 11,9  | 15,4  | 10,0  |       | 9,2    | 20,1 | 15,1 | 16,8 | 10,1 | 11,1  | 18,4  | 11,7  |      |
|    | 22,0  | 28,7  | 25,2  | 25,2  | 21,1  | 27,9  | 27,9  |       | 185,2  | 14,2 | 15,7 | 22,2 | 22,2 | 58,3  | 18,3  | 38,8  |      |
|    | 13,4  |       | 12,4  |       | 8,4   | 18,8  |       |       | 36,7   | 12,8 | 15,2 | 15,1 | 12,6 | 16,4  | 34,3  | 19,0  | 16,0 |
|    |       |       | 12,0  | 11,2  | 12,0  | 8,2   | 12,2  | 11,7  | 24,3   | 11,1 | 9,7  | 12,3 | 14,2 | 9,4   | 8,1   | 11,9  | 12,0 |
|    | 7,0   | 11,0  |       | 7,8   | 6,6   | 9,9   | 10,3  |       |        |      |      |      |      |       |       |       | 16,5 |
|    | 171,9 | 445,8 | 400,3 | 160,7 | 174,4 | 171,5 | 129,9 |       | 123,1  | 33,6 | 26,5 | 33,3 | 77,6 | 51,0  | 66,3  | 56,9  |      |
|    |       |       |       |       |       |       |       |       | 53,8   |      |      |      | 7,7  | 16,9  | 9,7   | 8,7   | 8,9  |
|    | 8,0   | 10,8  | 13,6  | 7,4   | 16,3  | 10,4  | 10,2  | 9,2   |        |      |      |      | 8,3  |       | 112,3 | 113,8 |      |
|    | 21,7  | 22,0  | 20,8  | 19,8  | 15,4  | 33,6  | 30,6  | 145,8 | 252,9  | 23,8 | 27,7 | 26,4 | 27,6 | 86,3  | 104,8 | 62,1  |      |
|    |       |       |       |       |       |       |       |       | 98,2   | 10,0 | 12,7 | 11,3 | 9,8  | 46,6  | 37,5  | 29,9  |      |
|    | 10,0  | 14,7  | 14,4  | 12,3  | 10,0  | 15,2  | 13,2  |       |        | 10,6 | 14,9 | 14,1 | 12,8 | 345,5 | 67,8  | 31,1  |      |
|    | 11,4  | 15,0  | 14,3  | 11,4  | 11,2  | 19,1  | 13,8  | 12,0  | 1052,9 | 9,7  | 14,6 | 12,8 | 12,5 | 339,7 | 72,6  | 26,7  |      |
|    | 7,5   |       |       |       |       | 10,3  | 9,5   |       | 34,1   |      |      |      |      | 15,6  | 12,5  | 15,3  |      |
|    |       |       |       | 7,5   | 7,1   |       |       | 9,5   |        |      |      |      |      |       |       |       | 11,5 |
|    |       | 11,7  | 10,1  | 7,7   | 7,3   | 15,1  | 24,9  |       | 15,4   |      | 10,9 | 16,4 | 7,4  | 8,6   | 9,1   |       |      |
|    | 11,5  | 20,5  | 14,8  | 8,3   | 10,5  | 19,2  | 20,0  | 14,5  | 17,5   | 12,6 | 16,1 | 19,2 | 10,4 | 8,7   | 12,2  | 8,5   |      |
|    | 19,7  | 29,8  | 21,8  | 8,1   | 9,0   | 20,9  | 19,2  | 12,3  | 13,9   | 11,3 | 16,9 | 19,7 | 8,8  |       | 23,2  | 14,1  | 14,2 |
