# Supplementary material for: A novel approach to evaluation of adsorbents for sampling indoor volatile organic compounds associated with symptom reports
Source: Royal Society of Chemistry journal article supplement (doi:10.1039/b808654k), 2008-01-01
Supplement: tab_s8.pdf [file tab_s8.pdf]

**Table S8.** Raw data of the most common peaks with Tenax TA ( $\mu\text{g}/\text{m}^3$ ).

| Variable<br>Rel RT | Participant<br>Sample | 2     |       | 9     |       | 17   |      | 52   |       | 54   |      | 61   |      | 62   |      |
|--------------------|-----------------------|-------|-------|-------|-------|------|------|------|-------|------|------|------|------|------|------|
|                    |                       | A     | B     | A     | B     | A    | B    | A    | B     | A    | B    | A    | B    | A    | B    |
| 73,2               |                       | 17,3  | 14,8  | 24,3  | 14,0  | 12,5 | 9,1  | 13,7 | 15,4  | 25,1 | 17,0 | 12,4 | 12,0 | 17,6 | 17,6 |
| 81,7               |                       | 11,2  | 11,1  | 16,0  | 10,1  | 9,3  | 9,0  | 11,1 | 12,5  | 11,0 | 11,9 | 10,2 | 10,6 | 15,8 | 14,4 |
| 100,2              |                       | 30,1  | 30,0  | 27,4  | 18,3  | 16,3 | 16,5 | 25,4 | 32,6  | 20,6 | 21,8 | 18,0 | 18,9 | 20,6 | 20,2 |
| 107,7              |                       |       |       | 20,2  | 10,8  | 7,6  | 7,7  | 11,4 | 10,7  | 13,1 | 11,0 | 8,9  | 11,0 | 10,3 | 9,9  |
| 110,7              |                       | 13,4  | 11,0  | 14,0  | 9,2   | 7,9  | 7,9  | 10,3 | 10,7  | 14,6 | 14,3 | 10,7 | 10,4 | 10,2 | 10,4 |
| 123,2              |                       | 12,1  | 12,0  | 11,8  | 8,8   | 7,7  | 8,0  |      |       | 9,9  | 9,6  | 9,1  | 9,1  | 9,5  | 9,5  |
| 124,7              |                       | 21,6  | 21,3  | 20,4  | 15,3  | 12,8 | 13,3 | 17,9 | 22,1  | 14,2 | 15,0 | 14,2 | 14,4 | 14,1 | 14,7 |
| 129,7              |                       | 19,2  | 15,0  | 37,8  | 12,1  | 17,3 | 17,7 | 12,1 | 33,3  | 19,8 | 10,5 | 10,1 | 10,0 | 19,8 | 17,0 |
| 130,2              |                       | 18,1  | 18,7  | 14,3  | 12,2  | 11,3 | 9,7  | 12,8 | 19,5  | 11,5 | 13,1 | 10,3 | 13,7 | 12,6 | 12,9 |
| 130,7              |                       | 8,5   |       | 9,8   | 8,1   |      |      | 9,1  | 10,0  | 8,3  | 8,7  |      | 8,7  | 7,6  | 8,6  |
| 139,2              |                       | 11,4  | 10,0  | 14,1  | 12,0  | 7,9  | 7,9  | 9,9  | 10,6  | 12,2 | 9,2  | 8,9  | 8,8  | 9,5  | 9,1  |
| 142,7              |                       | 9,3   | 9,3   | 9,3   | 8,4   | 6,9  | 7,2  | 9,8  | 10,3  |      |      |      |      | 8,4  |      |
| 148,7              |                       | 11,6  | 10,3  | 11,1  |       |      |      |      |       |      |      |      |      | 8,7  |      |
| 149,7              |                       | 17,4  | 10,6  | 32,5  | 11,5  | 11,1 | 11,5 |      | 14,1  | 15,3 |      | 9,8  | 9,4  | 22,6 | 10,9 |
| 150,7              |                       |       | 12,7  |       |       | 8,2  |      | 11,9 | 12,5  |      |      | 9,1  |      | 9,9  |      |
| 157,2              |                       | 36,6  | 32,5  | 169,3 | 178,3 | 25,6 | 29,5 | 29,0 | 34,7  | 34,1 | 39,0 | 34,6 | 39,2 | 68,8 | 55,8 |
| 158,2              |                       |       |       | 13,8  | 21,4  |      |      |      |       |      | 12,6 | 10,3 |      | 9,4  |      |
| 167,7              |                       | 12,5  | 10,8  | 9,6   | 7,6   |      |      | 10,4 | 11,9  |      |      |      |      |      |      |
| 168,7              |                       | 10,2  | 9,1   | 8,7   | 7,9   |      |      |      |       |      | 8,0  | 11,2 | 10,4 | 8,4  | 7,9  |
| 169,2              |                       | 56,0  | 26,3  | 42,9  |       | 26,4 |      | 36,0 | 40,2  | 43,4 | 33,3 | 31,8 | 34,3 | 28,2 | 32,2 |
| 179,7              |                       |       |       |       |       |      |      | 13,6 | 14,5  | 12,5 | 10,4 |      |      |      |      |
| 183,7              |                       | 13,6  | 9,6   | 10,0  | 10,5  | 7,1  |      |      |       | 10,1 | 8,8  | 8,4  | 8,8  | 8,6  | 9,6  |
| 193,2              |                       | 15,8  | 14,1  | 17,9  | 12,9  | 10,6 | 11,6 | 11,3 | 10,4  | 25,4 | 13,5 | 15,1 | 9,7  | 12,1 | 11,0 |
| 211,7              |                       | 30,9  | 18,3  | 23,9  | 15,2  | 21,1 | 7,1  | 20,3 | 21,6  | 33,1 | 26,3 | 22,1 | 31,3 | 36,5 | 9,8  |
| 214,7              |                       |       |       |       |       |      |      |      |       |      |      |      |      |      |      |
| 226,2              |                       |       | 9,4   |       |       | 8,5  |      | 11,0 | 10,6  | 24,0 | 10,9 |      |      | 10,8 |      |
| 226,7              |                       | 36,1  | 17,9  | 30,5  | 9,9   | 14,6 | 8,3  | 15,4 | 16,9  | 27,0 | 19,3 | 24,6 | 10,0 | 19,8 | 10,6 |
| 227,7              |                       | 42,1  | 27,4  | 27,6  | 19,3  | 45,8 | 43,6 | 33,0 | 29,5  | 34,3 | 42,3 | 46,2 | 54,8 | 56,1 | 49,4 |
| 243,7              |                       | 108,0 | 156,5 | 49,5  | 27,8  | 36,4 | 45,9 | 64,3 | 105,1 | 62,8 | 48,0 | 57,7 | 64,0 | 49,6 | 42,5 |
| 278                |                       | 12,2  | 12,6  |       |       | 15,0 |      | 14,7 | 12,5  | 8,5  | 12,6 | 14,3 | 14,7 | 19,6 |      |
| 284                |                       | 24,9  | 25,9  | 22,6  | 12,6  | 23,1 | 9,6  | 69,0 | 77,5  | 20,3 | 21,7 | 15,7 | 12,9 | 11,0 | 12,4 |

| 95    |      | 112  |       | 123  |      | 126  |      | 145   |      | 148   |       | 155   |       | 168   |       | 17    |
|-------|------|------|-------|------|------|------|------|-------|------|-------|-------|-------|-------|-------|-------|-------|
| A     | B    | A    | B     | A    | B    | A    | B    | A     | B    | A     | B     | A     | B     | A     | B     | A     |
| 20,9  | 17,6 | 19,4 | 22,8  | 13,6 | 14,4 | 21,1 | 15,1 | 15,2  | 13,4 | 83,9  | 17,5  |       |       | 16,2  | 58,4  | 13,1  |
| 14,0  | 11,8 | 12,7 | 14,2  | 11,1 | 11,0 | 12,5 | 10,0 | 9,3   | 10,1 | 17,1  | 12,6  | 16,7  | 18,3  | 9,9   | 10,6  | 10,7  |
| 26,1  | 23,6 | 34,4 | 40,8  | 17,1 | 18,5 | 35,1 | 25,7 | 30,2  | 28,0 | 38,6  | 27,3  | 30,1  | 36,3  | 25,1  | 25,5  | 20,3  |
| 16,8  | 12,6 | 11,0 | 16,4  | 12,3 | 9,3  | 14,1 | 8,8  | 11,8  | 8,2  |       | 9,0   | 15,9  | 22,5  | 7,8   |       | 8,8   |
| 12,5  | 10,9 | 14,2 | 27,8  | 8,2  | 8,9  | 9,9  | 8,2  | 8,4   | 8,3  | 213,6 | 11,7  | 100,1 | 533,9 | 17,2  | 141,6 | 9,5   |
| 11,8  | 10,1 | 13,4 | 13,8  | 7,9  | 8,4  | 12,4 | 10,1 |       |      | 71,0  | 10,1  | 44,5  | 179,5 | 7,2   | 34,8  | 8,0   |
| 20,5  | 17,6 | 24,1 | 27,0  | 13,5 | 13,6 | 22,9 | 17,3 | 18,8  | 17,6 | 109,5 | 18,0  | 58,0  | 257,4 | 19,1  | 74,7  | 13,4  |
| 33,4  | 18,0 | 16,4 | 34,2  | 18,3 | 21,6 | 12,5 | 9,7  | 42,9  | 8,1  |       |       | 10,8  | 13,2  |       |       | 8,6   |
| 16,5  | 13,5 | 17,8 | 19,7  | 12,9 | 10,2 | 15,5 | 13,7 | 15,1  | 12,9 | 46,3  | 13,4  | 30,7  | 109,0 | 12,8  | 33,8  | 10,3  |
| 10,4  |      |      | 10,0  | 6,9  |      | 7,5  | 7,4  | 7,2   | 7,0  | 10,4  |       | 10,6  | 12,5  | 6,3   | 7,5   | 6,7   |
| 10,9  | 10,5 | 11,8 | 12,8  | 7,9  | 8,3  | 12,0 | 9,4  | 13,9  | 8,7  |       |       | 11,1  | 10,8  |       |       | 9,9   |
| 9,7   | 8,8  | 11,0 | 11,9  | 6,9  | 7,0  | 9,3  | 7,9  | 9,4   | 8,3  | 9,1   | 8,2   | 9,4   | 10,8  | 7,3   | 7,7   | 7,2   |
| 11,2  |      |      |       | 6,9  |      | 8,6  |      | 23,9  |      | 19,4  | 16,4  | 10,9  | 11,0  | 10,5  | 11,9  | 10,6  |
| 14,8  | 14,6 |      | 12,1  | 15,2 | 12,0 |      |      |       |      | 8,2   | 7,9   |       |       | 7,4   | 7,5   | 7,3   |
|       |      | 15,1 | 15,4  |      | 8,3  | 12,8 | 10,2 |       |      | 31,1  | 21,7  | 8,8   | 34,4  | 21,6  | 18,0  |       |
| 167,8 | 10,3 | 37,5 | 53,4  |      | 34,2 | 50,8 | 32,9 | 43,2  | 26,0 | 531,4 | 475,8 | 141,1 | 138,1 | 218,3 | 214,8 | 192,9 |
| 10,1  | 10,7 |      |       |      | 8,1  | 9,3  | 8,4  |       |      |       |       | 9,8   | 10,3  | 14,8  |       | 10,0  |
| 9,3   |      | 12,4 | 13,6  |      |      | 13,0 | 8,9  |       |      | 9,5   | 9,0   | 10,2  | 11,2  | 9,7   | 8,2   | 8,9   |
| 17,5  | 29,3 | 10,8 | 11,9  | 7,5  | 6,9  | 8,4  | 7,8  |       |      | 32,7  | 23,8  |       |       | 25,8  | 26,2  |       |
| 47,8  |      | 32,9 | 42,3  | 45,4 | 32,1 | 38,6 | 25,8 | 45,4  | 53,7 |       | 23,8  | 45,2  | 53,3  |       |       | 29,8  |
|       |      |      |       |      |      | 15,6 | 12,7 | 17,5  | 10,9 | 12,0  | 9,1   | 19,3  | 23,4  | 10,5  | 9,6   | 11,3  |
| 13,1  |      |      |       | 9,3  | 7,6  | 8,7  | 8,1  | 29,4  | 7,4  | 9,1   | 8,4   |       |       | 7,9   | 7,5   | 8,7   |
| 22,8  | 8,1  | 10,3 | 15,9  | 10,7 | 12,5 | 8,7  | 10,1 | 9,1   | 10,7 |       |       | 10,4  | 11,8  | 7,1   | 7,6   | 7,8   |
| 45,6  | 14,2 | 15,8 | 19,0  | 23,3 | 27,1 | 23,2 | 18,0 | 23,8  | 22,3 | 18,7  | 14,6  | 18,8  | 21,1  | 10,8  | 11,1  | 26,2  |
|       |      |      |       |      |      |      |      | 18,8  | 9,6  | 10,4  | 8,3   | 9,2   | 10,6  | 7,0   | 6,8   | 8,5   |
| 12,1  |      |      | 11,0  |      |      | 9,1  | 8,2  | 8,7   |      | 28,5  | 14,3  | 10,0  | 9,8   | 13,6  | 18,8  | 23,7  |
| 25,4  |      | 18,6 | 18,5  | 8,7  | 26,4 | 18,5 | 14,7 | 15,0  | 15,9 |       |       | 14,3  | 18,4  |       |       |       |
| 73,1  | 21,1 | 26,5 | 36,6  | 27,8 | 43,1 | 38,4 | 28,2 | 33,3  | 41,6 | 10,4  | 25,3  | 35,9  | 11,5  | 8,0   | 7,9   | 9,5   |
| 95,3  |      | 47,3 | 110,0 | 32,3 | 50,5 | 83,7 | 76,8 | 110,4 | 64,4 |       | 34,1  | 37,4  | 63,1  |       |       | 41,8  |
| 19,9  | 14,9 | 15,3 | 15,0  | 10,6 | 13,1 | 13,5 | 9,1  | 11,3  | 9,2  | 16,9  | 9,9   | 9,1   | 12,2  | 12,2  | 11,2  | 9,7   |
| 12,5  | 12,2 | 15,9 | 14,2  | 9,7  | 12,0 | 24,8 | 15,4 | 11,1  | 11,6 | 11,9  | 9,1   | 42,2  | 49,8  | 130,3 | 147,4 | 23,1  |

| 71    | 172   |       | 176   |       | 181   |       | 214   |       | 234  |      | 235  |      | 237   |       | 28    |
|-------|-------|-------|-------|-------|-------|-------|-------|-------|------|------|------|------|-------|-------|-------|
| B     | A     | B     | A     | B     | A     | B     | A     | B     | A    | B    | A    | B    | A     | B     | A     |
| 10,9  | 16,6  | 13,3  | 19,0  | 178,4 | 18,0  | 63,7  | 23,1  | 38,2  | 13,0 | 18,2 | 15,7 | 16,0 | 14,4  | 17,5  | 20,2  |
| 10,2  | 9,9   | 9,7   | 9,7   | 13,2  | 16,8  | 16,3  | 14,1  | 14,9  | 12,0 | 15,0 | 13,3 | 13,7 | 10,8  | 9,2   | 10,8  |
| 23,2  | 25,0  | 22,8  | 23,4  | 35,3  | 27,4  | 33,5  | 25,9  | 27,9  | 20,9 | 29,0 | 24,2 | 26,1 | 21,5  | 19,0  | 18,1  |
| 8,2   | 9,9   | 7,7   | 8,1   |       | 17,9  | 19,0  | 10,0  | 12,9  | 18,8 | 24,8 | 18,5 | 20,3 | 14,7  | 13,5  | 12,8  |
| 9,6   | 14,2  | 8,0   | 28,1  | 490,6 | 13,4  | 149,1 | 35,0  | 86,7  | 9,6  | 10,7 | 14,7 | 13,1 | 12,8  | 12,3  | 20,4  |
| 7,9   | 7,4   | 8,7   | 9,1   | 185,9 | 10,8  | 59,8  | 11,5  | 38,1  |      |      |      |      |       |       |       |
| 12,9  | 17,1  | 15,3  | 23,1  | 253,3 | 17,2  | 84,3  | 25,5  | 47,2  | 15,0 | 20,7 | 18,5 | 19,4 | 16,3  | 15,4  | 12,5  |
| 6,9   | 12,8  | 8,7   | 18,3  | 122,0 | 9,7   | 11,8  | 14,4  | 14,1  | 13,1 | 11,6 | 17,6 | 16,0 | 19,3  | 13,1  | 10,7  |
| 9,9   | 11,6  | 10,5  | 14,3  | 109,8 | 15,2  | 38,4  | 15,8  | 25,5  | 14,6 | 15,6 | 15,8 |      | 15,2  |       | 11,1  |
|       |       | 6,6   | 6,3   | 10,9  | 10,2  | 11,8  | 7,4   | 8,7   | 23,6 | 25,0 | 24,3 | 25,2 | 9,6   | 18,2  | 19,2  |
| 8,8   | 9,9   | 9,9   |       |       | 11,7  | 12,6  | 11,9  | 11,1  | 11,0 | 11,5 |      |      | 12,2  | 12,0  | 10,6  |
|       | 7,1   | 7,4   | 7,4   | 9,7   | 9,8   | 10,8  | 8,1   | 8,3   | 9,5  | 10,1 |      |      | 8,4   | 8,1   |       |
| 10,6  | 13,8  | 13,7  | 11,5  | 13,2  | 12,0  | 12,0  | 11,2  | 12,1  | 9,7  | 9,7  | 13,7 | 14,3 | 10,5  | 11,2  | 10,1  |
|       | 7,7   |       | 7,9   | 9,3   | 9,7   |       | 8,1   |       | 9,9  | 10,1 | 12,2 | 10,9 | 8,6   | 9,7   | 8,7   |
|       | 14,6  | 7,5   | 17,8  | 35,6  | 23,7  | 10,2  | 16,7  | 11,7  | 26,1 | 31,6 | 27,3 | 27,3 |       | 20,9  | 18,0  |
| 196,5 | 332,0 | 326,2 | 195,1 | 193,3 | 162,4 | 166,2 | 190,0 | 197,1 | 68,0 | 79,9 | 60,4 | 50,4 | 131,7 | 138,3 | 123,5 |
| 10,4  | 7,7   | 8,0   | 11,9  | 13,1  | 10,2  |       | 8,4   | 8,7   |      |      | 20,2 | 17,6 | 11,4  | 11,6  | 10,4  |
| 10,8  | 9,0   | 8,7   | 11,1  | 11,5  | 12,2  | 14,5  | 9,6   | 10,5  | 13,1 | 13,4 | 13,9 | 13,5 | 13,9  | 13,2  | 10,3  |
|       | 19,6  | 20,1  | 37,6  | 44,2  |       |       | 32,8  | 31,5  | 85,5 | 92,8 | 57,7 | 80,9 |       | 47,1  | 40,3  |
| 26,5  |       | 20,1  | 37,6  |       | 52,6  | 45,0  |       | 31,5  |      |      |      |      | 60,4  |       |       |
| 12,0  | 10,2  | 10,1  | 13,3  | 16,9  | 14,8  | 14,7  | 14,5  | 14,0  | 16,1 | 18,4 | 16,8 | 19,3 | 25,7  | 24,9  | 11,4  |
| 9,6   | 8,4   | 7,8   | 9,4   | 10,5  | 12,8  |       | 9,3   | 10,2  | 12,9 | 12,0 | 13,8 | 14,8 | 16,8  | 15,4  | 11,1  |
| 7,9   |       |       | 15,5  | 9,0   | 10,2  | 10,0  |       |       | 11,7 | 12,2 |      |      | 8,2   | 6,6   | 11,1  |
| 15,0  | 12,2  | 11,6  | 13,5  | 21,5  | 15,0  | 14,3  | 10,1  | 19,0  |      |      |      |      |       |       |       |
| 7,7   | 7,3   | 7,4   | 7,0   | 10,2  | 9,4   | 11,0  | 9,3   | 9,8   | 13,3 | 13,9 |      |      | 12,5  | 9,9   | 10,0  |
| 7,8   | 10,2  |       | 14,3  | 21,7  | 24,0  | 12,9  | 17,6  | 24,9  | 21,0 | 28,3 | 26,2 | 27,5 | 31,9  | 16,0  | 14,7  |
| 13,3  |       | 11,3  |       |       |       | 19,5  |       |       |      |      |      | 25,5 |       |       |       |
| 8,5   |       |       | 8,2   | 11,6  | 11,9  | 49,4  | 10,2  | 10,5  | 16,2 | 15,5 | 13,7 |      | 13,1  | 9,1   |       |
| 41,6  | 26,9  | 24,8  | 35,0  | 92,2  | 31,8  | 105,2 | 48,7  | 43,6  |      |      |      |      | 116,7 | 74,0  |       |
| 9,3   |       | 9,3   | 9,0   | 9,8   |       | 14,8  | 11,1  | 11,2  | 15,6 | 20,9 | 15,7 | 19,9 | 17,4  | 13,1  | 11,5  |
| 39,7  | 15,1  | 20,5  | 10,0  | 10,2  | 15,7  | 20,6  | 15,6  | 22,0  | 19,5 | 26,6 | 23,0 | 30,3 | 17,9  | 28,0  | 29,2  |
