# Supplementary material for: A novel approach to evaluation of adsorbents for sampling indoor volatile organic compounds associated with symptom reports
Source: Royal Society of Chemistry journal article supplement (doi:10.1039/b808654k), 2008-01-01
Supplement: tab_s9.pdf [file tab_s9.pdf]

**Table S9.** Data from samples taken with Carbo-pack B used in PCA, and PLS-DA models separating cases and controls ( $\mu\text{g}/\text{m}^3$ ).

| Variable<br>Rel RT | Participant<br>Sample | 2<br>A | 2<br>B | 9<br>A | 9<br>B | 17<br>A | 17<br>B | 52<br>A | 52<br>B | 54<br>A | 54<br>B | 61<br>A | 61<br>B | 62<br>A | 62<br>B | 95<br>A |     |
|--------------------|-----------------------|--------|--------|--------|--------|---------|---------|---------|---------|---------|---------|---------|---------|---------|---------|---------|-----|
| 52,2               |                       | 14,4   | 9,3    | 2,8    | 7,7    | 8,1     | 2,8     | 13,3    | 2,8     | 2,8     | 2,8     | 2,8     | 2,8     | 2,8     | 2,8     | 12,7    | 7,8 |
| 72,7               |                       | 2,8    | 18,5   | 2,8    | 2,8    | 2,8     | 2,8     | 2,8     | 22,7    | 10,9    | 2,8     | 2,8     | 15,9    | 2,8     | 2,8     | 18,5    |     |
| 73,2               |                       | 19,5   | 2,8    | 14,5   | 17,2   | 18,3    | 16,8    | 22,8    | 2,8     | 12,5    | 13,5    | 17,2    | 2,8     | 27,0    | 42,7    | 2,8     |     |
| 75,7               |                       | 9,6    | 2,8    | 2,8    | 8,8    | 8,0     | 2,8     | 10,5    | 12,4    | 2,8     | 2,8     | 2,8     | 2,8     | 12,6    | 15,4    | 10,0    |     |
| 81,7               |                       | 11,4   | 11,0   | 13,3   | 11,7   | 9,7     | 9,2     | 12,0    | 39,7    | 10,9    | 10,7    | 10,6    | 11,3    | 15,7    | 33,2    | 13,9    |     |
| 84,7               |                       | 2,8    | 9,0    | 2,8    | 2,8    | 10,1    | 2,8     | 2,8     | 10,2    | 2,8     | 2,8     | 2,8     | 2,8     | 2,8     | 2,8     | 2,8     |     |
| 96,2               |                       | 2,8    | 2,8    | 2,8    | 2,8    | 2,8     | 2,8     | 2,8     | 2,8     | 2,8     | 2,8     | 2,8     | 2,8     | 8,7     | 9,3     | 2,8     |     |
| 100,2              |                       | 31,2   | 28,7   | 20,5   | 21,9   | 22,0    | 16,2    | 33,8    | 61,3    | 22,9    | 20,7    | 21,2    | 19,9    | 20,9    | 61,5    | 24,1    |     |
| 107,2              |                       | 2,8    | 2,8    | 2,8    | 2,8    | 6,6     | 2,8     | 2,8     | 10,9    | 2,8     | 2,8     | 2,8     | 2,8     | 7,7     | 45,2    | 2,8     |     |
| 107,7              |                       | 9,0    | 2,8    | 9,0    | 10,4   | 2,8     | 2,8     | 10,3    | 2,8     | 2,8     | 11,7    | 2,8     | 2,8     | 2,8     | 2,8     | 2,8     |     |
| 110,7              |                       | 15,1   | 11,6   | 10,0   | 9,5    | 7,8     | 7,2     | 11,6    | 10,8    | 8,9     | 10,2    | 9,1     | 9,1     | 9,7     | 28,1    | 9,3     |     |
| 116,2              |                       | 16,0   | 2,8    | 2,8    | 2,8    | 2,8     | 2,8     | 2,8     | 2,8     | 48,7    | 2,8     | 2,8     | 2,8     | 2,8     | 2,8     | 2,8     |     |
| 122,7              |                       | 2,8    | 2,8    | 9,2    | 2,8    | 8,9     | 8,2     | 2,8     | 2,8     | 2,8     | 2,8     | 2,8     | 2,8     | 9,4     | 15,8    | 10,8    |     |
| 123,2              |                       | 12,9   | 11,7   | 2,8    | 9,4    | 2,8     | 2,8     | 12,5    | 12,0    | 9,2     | 18,3    | 9,2     | 9,4     | 2,8     | 2,8     | 2,8     |     |
| 124,7              |                       | 21,2   | 18,7   | 15,1   | 14,0   | 15,1    | 12,5    | 21,5    | 20,4    | 13,6    | 13,4    | 14,6    | 14,7    | 13,8    | 35,4    | 16,4    |     |
| 125,2              |                       | 2,8    | 2,8    | 8,4    | 2,8    | 2,8     | 2,8     | 2,8     | 2,8     | 2,8     | 2,8     | 2,8     | 2,8     | 2,8     | 2,8     | 2,8     |     |
| 129,7              |                       | 28,7   | 20,7   | 28,0   | 29,6   | 28,8    | 29,3    | 12,3    | 20,8    | 10,7    | 12,0    | 10,8    | 10,5    | 17,1    | 18,6    | 63,4    |     |
| 130,2              |                       | 13,7   | 12,4   | 11,0   | 10,8   | 10,3    | 9,2     | 13,9    | 14,2    | 10,0    | 10,0    | 10,3    | 10,2    | 10,3    | 15,5    | 12,0    |     |
| 130,7              |                       | 2,8    | 2,8    | 7,8    | 2,8    | 2,8     | 2,8     | 2,8     | 2,8     | 2,8     | 2,8     | 2,8     | 2,8     | 2,8     | 12,3    | 2,8     |     |
| 138,7              |                       | 2,8    | 2,8    | 2,8    | 2,8    | 2,8     | 2,8     | 2,8     | 2,8     | 2,8     | 2,8     | 2,8     | 2,8     | 2,8     | 2,8     | 2,8     |     |
| 139,2              |                       | 9,7    | 2,8    | 11,0   | 11,6   | 7,7     | 7,7     | 10,4    | 2,8     | 2,8     | 9,1     | 2,8     | 8,8     | 2,8     | 13,1    | 10,3    |     |
| 139,7              |                       | 2,8    | 8,9    | 2,8    | 2,8    | 2,8     | 2,8     | 2,8     | 2,8     | 2,8     | 2,8     | 2,8     | 2,8     | 2,8     | 2,8     | 2,8     |     |
| 142,7              |                       | 9,9    | 9,5    | 8,9    | 8,6    | 8,6     | 7,3     | 10,2    | 10,3    | 2,8     | 9,1     | 2,8     | 2,8     | 8,9     | 13,2    | 9,2     |     |
| 144,2              |                       | 2,8    | 2,8    | 2,8    | 2,8    | 2,8     | 2,8     | 11,5    | 12,2    | 2,8     | 87,1    | 2,8     | 8,7     | 2,8     | 2,8     | 2,8     |     |
| 144,7              |                       | 30,4   | 17,0   | 22,3   | 18,9   | 29,5    | 25,8    | 14,0    | 14,9    | 18,0    | 2,8     | 12,9    | 9,8     | 17,9    | 27,2    | 27,5    |     |
| 145,2              |                       | 2,8    | 2,8    | 2,8    | 2,8    | 2,8     | 2,8     | 2,8     | 2,8     | 2,8     | 2,8     | 2,8     | 2,8     | 2,8     | 2,8     | 2,8     |     |
| 145,7              |                       | 9,9    | 9,2    | 9,1    | 8,6    | 8,7     | 8,9     | 10,2    | 2,8     | 8,9     | 8,4     | 2,8     | 2,8     | 9,8     | 10,7    | 9,3     |     |
| 147,7              |                       | 2,8    | 2,8    | 2,8    | 2,8    | 2,8     | 2,8     | 2,8     | 2,8     | 2,8     | 2,8     | 2,8     | 2,8     | 2,8     | 24,0    | 2,8     |     |
| 148,2              |                       | 11,4   | 9,7    | 13,3   | 11,2   | 9,6     | 8,9     | 11,5    | 11,0    | 2,8     | 10,0    | 8,3     | 9,3     | 9,2     | 2,8     | 10,0    |     |
| 148,7              |                       | 9,3    | 2,8    | 10,4   | 9,1    | 2,8     | 2,8     | 2,8     | 2,8     | 2,8     | 2,8     | 2,8     | 2,8     | 2,8     | 9,7     | 9,3     |     |
| 149,2              |                       | 2,8    | 2,8    | 11,7   | 2,8    | 9,8     | 9,6     | 2,8     | 2,8     | 2,8     | 9,3     | 2,8     | 2,8     | 9,6     | 28,4    | 9,9     |     |
| 150,7              |                       | 13,6   | 12,5   | 10,5   | 10,4   | 10,3    | 7,5     | 12,5    | 33,2    | 8,2     | 10,1    | 8,7     | 8,2     | 8,6     | 13,2    | 9,6     |     |
| 151,2              |                       | 2,8    | 2,8    | 8,7    | 8,1    | 2,8     | 2,8     | 10,2    | 19,9    | 2,8     | 2,8     | 2,8     | 2,8     | 2,8     | 19,1    | 8,6     |     |
| 151,7              |                       | 2,8    | 2,8    | 2,8    | 2,8    | 2,8     | 2,8     | 2,8     | 2,8     | 2,8     | 2,8     | 2,8     | 2,8     | 2,8     | 2,8     | 2,8     |     |
| 152,7              |                       | 2,8    | 2,8    | 2,8    | 2,8    | 2,8     | 2,8     | 2,8     | 2,8     | 2,8     | 2,8     | 2,8     | 2,8     | 2,8     | 8,7     | 2,8     |     |
| 153,7              |                       | 2,8    | 2,8    | 2,8    | 2,8    | 2,8     | 2,8     | 2,8     | 2,8     | 2,8     | 2,8     | 2,8     | 2,8     | 2,8     | 2,8     | 2,8     |     |
| 155,7              |                       | 9,5    | 2,8    | 10,7   | 10,6   | 7,1     | 8,1     | 2,8     | 11,3    | 2,8     | 11,0    | 2,8     | 2,8     | 2,8     | 22,9    | 8,6     |     |
| 156,2              |                       | 9,9    | 2,8    | 14,9   | 2,8    | 13,4    | 8,5     | 2,8     | 2,8     | 2,8     | 9,9     | 12,8    | 2,8     | 14,8    | 11,4    | 10,0    |     |
| 156,7              |                       | 2,8    | 16,5   | 2,8    | 20,4   | 2,8     | 2,8     | 2,8     | 15,0    | 10,4    | 2,8     | 2,8     | 8,2     | 2,8     | 12,6    | 7,9     |     |
| 157,2              |                       | 28,2   | 20,3   | 143,5  | 128,6  | 19,9    | 21,3    | 34,7    | 17,7    | 14,4    | 24,7    | 17,8    | 19,1    | 29,2    | 70,9    | 67,9    |     |
| 158,2              |                       | 2,8    | 2,8    | 11,0   | 2,8    | 2,8     | 2,8     | 2,8     | 2,8     | 2,8     | 9,3     | 2,8     | 2,8     | 2,8     | 11,1    | 2,8     |     |
| 167,7              |                       | 2,8    | 2,8    | 2,8    | 2,8    | 2,8     | 2,8     | 2,8     | 2,8     | 2,8     | 22,0    | 2,8     | 2,8     | 2,8     | 2,8     | 2,8     |     |
| 168,2              |                       | 2,8    | 10,1   | 10,8   | 9,6    | 9,3     | 2,8     | 2,8     | 10,5    | 9,5     | 2,8     | 9,6     | 2,8     | 9,1     | 2,8     | 8,6     |     |
| 168,7              |                       | 2,8    | 2,8    | 2,8    | 2,8    | 2,8     | 2,8     | 2,8     | 2,8     | 2,8     | 2,8     | 2,8     | 2,8     | 2,8     | 2,8     | 2,8     |     |
| 169,2              |                       | 14,0   | 9,3    | 12,2   | 12,2   | 2,8     | 14,4    | 12,9    | 11,3    | 10,8    | 17,8    | 8,6     | 10,3    | 10,7    | 23,4    | 14,8    |     |
| 170,2              |                       | 2,8    | 2,8    | 2,8    | 2,8    | 2,8     | 2,8     | 2,8     | 2,8     | 2,8     | 2,8     | 2,8     | 2,8     | 2,8     | 2,8     | 2,8     |     |
| 177,7              |                       | 12,3   | 2,8    | 2,8    | 2,8    | 2,8     | 7,2     | 2,8     | 16,3    | 2,8     | 8,9     | 2,8     | 2,8     | 2,8     | 2,8     | 9,0     |     |
| 185,7              |                       | 9,8    | 9,1    | 8,5    | 7,9    | 2,8     | 7,8     | 10,4    | 10,5    | 9,6     | 10,0    | 2,8     | 8,2     | 2,8     | 13,1    | 11,1    |     |
| 192,7              |                       | 10,8   | 2,8    | 7,3    | 2,8    | 2,8     | 7,6     | 2,8     | 2,8     | 2,8     | 9,1     | 2,8     | 2,8     | 2,8     | 2,8     | 11,4    |     |
| 205,7              |                       | 44,7   | 2,8    | 11,5   | 2,8    | 2,8     | 9,8     | 2,8     | 17,3    | 2,8     | 9,7     | 2,8     | 2,8     | 13,3    | 10,7    | 22,4    |     |
| 206,2              |                       | 2,8    | 12,5   | 2,8    | 12,0   | 8,2     | 2,8     | 10,7    | 2,8     | 12,8    | 2,8     | 10,0    | 11,9    | 2,8     | 2,8     | 2,8     |     |
| 207,2              |                       | 10,2   | 2,8    | 2,8    | 2,8    | 2,8     | 2,8     | 2,8     | 13,0    | 9,7     | 2,8     | 2,8     | 2,8     | 2,8     | 2,8     | 2,8     |     |
| 211,7              |                       | 11,9   | 2,8    | 8,8    | 10,7   | 2,8     | 10,0    | 2,8     | 12,4    | 2,8     | 14,6    | 2,8     | 9,4     | 9,5     | 13,0    | 10,4    |     |

|                |      |      |      |      |      |      |      |       |      |      |      |      |      |      |      |
|----------------|------|------|------|------|------|------|------|-------|------|------|------|------|------|------|------|
| 221,7          | 10,3 | 10,3 | 2,8  | 2,8  | 2,8  | 8,3  | 2,8  | 11,3  | 12,3 | 9,6  | 2,8  | 9,1  | 2,8  | 2,8  | 2,8  |
| 223,2          | 2,8  | 2,8  | 13,0 | 2,8  | 2,8  | 2,8  | 2,8  | 2,8   | 2,8  | 2,8  | 2,8  | 2,8  | 11,9 | 9,6  | 21,6 |
| 223,7          | 37,8 | 2,8  | 2,8  | 12,5 | 10,4 | 13,3 | 2,8  | 27,7  | 17,8 | 2,8  | 10,6 | 14,9 | 2,8  | 2,8  | 2,8  |
| 226,7          | 2,8  | 2,8  | 2,8  | 2,8  | 2,8  | 2,8  | 2,8  | 2,8   | 17,0 | 9,8  | 2,8  | 2,8  | 2,8  | 2,8  | 10,8 |
| 231,7          | 2,8  | 11,2 | 2,8  | 7,5  | 2,8  | 7,2  | 11,3 | 14,1  | 9,5  | 10,1 | 8,5  | 8,3  | 2,8  | 8,0  | 7,9  |
| 232,7          | 58,5 | 23,6 | 2,8  | 2,8  | 7,4  | 7,9  | 2,8  | 2,8   | 2,8  | 2,8  | 2,8  | 2,8  | 10,4 | 8,6  | 8,3  |
| 241,2          | 2,8  | 2,8  | 7,5  | 2,8  | 2,8  | 7,2  | 2,8  | 2,8   | 2,8  | 10,2 | 2,8  | 2,8  | 2,8  | 9,2  | 10,5 |
| 241,7          | 9,1  | 2,8  | 2,8  | 2,8  | 2,8  | 2,8  | 2,8  | 2,8   | 14,1 | 12,7 | 2,8  | 2,8  | 2,8  | 2,8  | 2,8  |
| 243,2          | 2,8  | 2,8  | 2,8  | 2,8  | 2,8  | 2,8  | 2,8  | 2,8   | 2,8  | 2,8  | 2,8  | 2,8  | 2,8  | 2,8  | 2,8  |
| 243,7          | 28,6 | 11,1 | 9,8  | 2,8  | 2,8  | 8,6  | 2,8  | 18,1  | 2,8  | 20,4 | 8,6  | 15,2 | 11,7 | 10,6 | 34,7 |
| 258,2          | 11,1 | 9,7  | 2,8  | 2,8  | 2,8  | 8,6  | 10,2 | 9,6   | 13,8 | 9,7  | 2,8  | 2,8  | 2,8  | 2,8  | 2,8  |
| 278            | 10,1 | 9,6  | 8,5  | 2,8  | 2,8  | 9,1  | 10,6 | 10,0  | 2,8  | 7,2  | 2,8  | 2,8  | 2,8  | 9,7  | 2,8  |
| 284            | 2,8  | 2,8  | 11,0 | 2,8  | 2,8  | 2,8  | 2,8  | 2,8   | 2,8  | 2,8  | 2,8  | 2,8  | 9,6  | 10,5 | 9,1  |
| 284            | 25,7 | 19,3 | 2,8  | 9,7  | 7,7  | 16,6 | 45,3 | 241,8 | 19,8 | 17,8 | 2,8  | 2,8  | 2,8  | 2,8  | 2,8  |
| 301            | 30,4 | 14,7 | 13,3 | 2,8  | 2,8  | 14,3 | 2,8  | 2,8   | 2,8  | 2,8  | 2,8  | 2,8  | 11,0 | 11,2 | 11,9 |
| 312            | 2,8  | 8,0  | 2,8  | 2,8  | 2,8  | 2,8  | 9,6  | 8,4   | 2,8  | 17,4 | 2,8  | 2,8  | 2,8  | 2,8  | 2,8  |
| 312            | 2,8  | 2,8  | 2,8  | 6,3  | 2,8  | 2,8  | 8,8  | 2,8   | 16,9 | 7,4  | 2,8  | 9,6  | 2,8  | 2,8  | 8,5  |
| Case-1, Cont-2 | 1    | 1    | 1    | 1    | 1    | 1    | 2    | 2     | 2    | 2    | 2    | 2    | 1    | 1    | 2    |



|      |      |      |      |      |      |      |      |     |     |      |      |      |      |      |      |     |      |
|------|------|------|------|------|------|------|------|-----|-----|------|------|------|------|------|------|-----|------|
| 2,8  | 29,7 | 2,8  | 2,8  | 2,8  | 10,5 | 16,0 | 14,3 | 2,8 | 2,8 | 2,8  | 2,8  | 2,8  | 2,8  | 2,8  | 2,8  | 2,8 | 2,8  |
| 2,8  | 2,8  | 9,2  | 2,8  | 2,8  | 2,8  | 2,8  | 2,8  | 2,8 | 9,7 | 2,8  | 2,8  | 2,8  | 2,8  | 2,8  | 2,8  | 2,8 | 11,4 |
| 14,8 | 31,1 | 2,8  | 17,9 | 9,5  | 11,8 | 17,8 | 14,2 | 2,8 | 2,8 | 2,8  | 2,8  | 2,8  | 2,8  | 2,8  | 2,8  | 2,8 | 2,8  |
| 2,8  | 17,7 | 2,8  | 2,8  | 2,8  | 10,1 | 13,2 | 10,1 | 2,8 | 2,8 | 2,8  | 2,8  | 2,8  | 2,8  | 2,8  | 2,8  | 2,8 | 2,8  |
| 13,7 | 13,9 | 7,7  | 6,8  | 8,3  | 2,8  | 9,3  | 2,8  | 2,8 | 2,8 | 2,8  | 2,8  | 2,8  | 2,8  | 2,8  | 2,8  | 2,8 | 2,8  |
| 9,7  | 13,2 | 6,5  | 2,8  | 2,8  | 46,7 | 2,8  | 2,8  | 2,8 | 2,8 | 7,3  | 2,8  | 2,8  | 2,8  | 2,8  | 2,8  | 2,8 | 2,8  |
| 2,8  | 2,8  | 2,8  | 2,8  | 2,8  | 2,8  | 2,8  | 2,8  | 2,8 | 2,8 | 2,8  | 10,1 | 2,8  | 2,8  | 2,8  | 2,8  | 2,8 | 2,8  |
| 2,8  | 16,6 | 2,8  | 2,8  | 2,8  | 10,7 | 11,8 | 11,3 | 2,8 | 2,8 | 2,8  | 2,8  | 2,8  | 2,8  | 2,8  | 2,8  | 2,8 | 2,8  |
| 2,8  | 2,8  | 2,8  | 2,8  | 2,8  | 2,8  | 2,8  | 2,8  | 2,8 | 8,4 | 2,8  | 2,8  | 2,8  | 2,8  | 2,8  | 18,4 | 2,8 | 2,8  |
| 13,0 | 91,0 | 11,3 | 8,6  | 11,7 | 17,8 | 43,0 | 2,8  | 2,8 | 2,8 | 2,8  | 2,8  | 2,8  | 2,8  | 2,8  | 2,8  | 2,8 | 2,8  |
| 2,8  | 15,9 | 7,2  | 2,8  | 2,8  | 9,7  | 10,9 | 2,8  | 2,8 | 2,8 | 2,8  | 2,8  | 2,8  | 2,8  | 2,8  | 2,8  | 2,8 | 2,8  |
| 2,8  | 2,8  | 8,1  | 2,8  | 2,8  | 8,6  | 9,4  | 2,8  | 2,8 | 2,8 | 2,8  | 2,8  | 2,8  | 2,8  | 2,8  | 2,8  | 2,8 | 2,8  |
| 20,4 | 2,8  | 2,8  | 2,8  | 2,8  | 2,8  | 2,8  | 2,8  | 2,8 | 2,8 | 20,3 | 2,8  | 21,7 | 18,9 | 16,3 | 2,8  | 2,8 | 11,9 |
| 2,8  | 15,0 | 8,5  | 2,8  | 2,8  | 17,1 | 11,0 | 2,8  | 2,8 | 2,8 | 2,8  | 2,8  | 2,8  | 2,8  | 2,8  | 2,8  | 2,8 | 2,8  |
| 9,5  | 12,5 | 9,1  | 7,8  | 2,8  | 24,5 | 2,8  | 2,8  | 2,8 | 2,8 | 2,8  | 2,8  | 2,8  | 2,8  | 2,8  | 2,8  | 2,8 | 2,8  |
| 7,1  | 22,1 | 2,8  | 2,8  | 14,7 | 15,6 | 7,2  | 2,8  | 2,8 | 2,8 | 2,8  | 2,8  | 2,8  | 2,8  | 2,8  | 2,8  | 5,8 | 2,8  |
| 2,8  | 14,7 | 7,2  | 6,5  | 2,8  | 2,8  | 7,5  | 12,1 | 2,8 | 2,8 | 2,8  | 2,8  | 2,8  | 2,8  | 2,8  | 2,8  | 2,8 | 9,7  |
| 2    | 2    | 1    | 1    | 2    | 2    | 1    | 1    | 2   | 2   | 1    | 1    | 1    | 1    | 1    | 2    | 2   | 1    |

| 172<br>B | 176<br>A | 176<br>B | 181<br>A | 181<br>B | 214<br>A | 214<br>B | 214<br>C214 | 234<br>A | 234<br>B | 235<br>A | 235<br>B | 237<br>A | 237<br>B | 280<br>A | 280<br>B | 300<br>A | 300<br>B |
|----------|----------|----------|----------|----------|----------|----------|-------------|----------|----------|----------|----------|----------|----------|----------|----------|----------|----------|
| 2,8      | 2,8      | 2,8      | 2,8      | 8,8      | 2,8      | 2,8      | 2,8         | 2,8      | 2,8      | 2,8      | 2,8      | 2,8      | 2,8      | 2,8      | 2,8      | 2,8      | 2,8      |
| 2,8      | 2,8      | 2,8      | 2,8      | 2,8      | 2,8      | 2,8      | 2,8         | 2,8      | 2,8      | 9,0      | 2,8      | 2,8      | 12,3     | 11,0     | 13,5     | 2,8      | 2,8      |
| 19,1     | 2,8      | 16,5     | 25,6     | 32,4     | 20,6     | 19,9     | 25,9        | 13,4     | 16,4     | 2,8      | 16,3     | 10,7     | 2,8      | 2,8      | 2,8      | 2,8      | 2,8      |
| 12,1     | 2,8      | 8,2      | 12,9     | 12,9     | 13,7     | 12,7     | 12,6        | 2,8      | 2,8      | 2,8      | 2,8      | 2,8      | 2,8      | 2,8      | 2,8      | 2,8      | 2,8      |
| 13,6     | 2,8      | 10,7     | 15,9     | 17,6     | 15,9     | 16,0     | 15,4        | 2,8      | 12,5     | 2,8      | 13,0     | 8,5      | 8,1      | 2,8      | 9,1      | 27,5     | 48,6     |
| 2,8      | 2,8      | 2,8      | 2,8      | 2,8      | 2,8      | 2,8      | 2,8         | 2,8      | 2,8      | 2,8      | 2,8      | 11,5     | 20,0     | 2,8      | 2,8      | 2,8      | 2,8      |
| 2,8      | 2,8      | 2,8      | 2,8      | 2,8      | 8,2      | 8,2      | 8,2         | 2,8      | 2,8      | 2,8      | 2,8      | 2,8      | 2,8      | 2,8      | 2,8      | 2,8      | 8,0      |
| 33,0     | 16,7     | 24,1     | 24,2     | 29,9     | 20,0     | 22,3     | 23,8        | 24,3     | 22,1     | 17,0     | 24,9     | 18,0     | 16,9     | 14,2     | 17,5     | 18,4     | 38,2     |
| 2,8      | 2,8      | 2,8      | 2,8      | 2,8      | 2,8      | 2,8      | 2,8         | 2,8      | 9,0      | 2,8      | 2,8      | 2,8      | 6,6      | 2,8      | 2,8      | 2,8      | 2,8      |
| 10,7     | 2,8      | 8,9      | 11,9     | 16,4     | 9,6      | 11,2     | 9,2         | 31,6     | 9,5      | 12,6     | 11,6     | 2,8      | 2,8      | 2,8      | 2,8      | 9,4      | 16,4     |
| 2,8      | 2,8      | 15,7     | 11,5     | 80,2     | 10,5     | 14,8     | 25,3        | 9,6      | 9,7      | 12,3     | 15,0     | 9,6      | 9,5      | 12,5     | 24,2     | 2,8      | 2,8      |
| 2,8      | 2,8      | 2,8      | 2,8      | 2,8      | 2,8      | 2,8      | 2,8         | 17,8     | 12,2     | 2,8      | 2,8      | 2,8      | 2,8      | 2,8      | 2,8      | 9,0      | 8,9      |
| 11,9     | 2,8      | 8,9      | 10,3     | 16,7     | 2,8      | 9,4      | 12,2        | 9,5      | 9,5      | 2,8      | 12,0     | 7,8      | 7,6      | 2,8      | 8,8      | 2,8      | 2,8      |
| 2,8      | 2,8      | 2,8      | 2,8      | 15,3     | 10,7     | 2,8      | 2,8         | 10,2     | 2,8      | 2,8      | 2,8      | 2,8      | 2,8      | 2,8      | 2,8      | 8,8      | 11,2     |
| 18,2     | 2,8      | 15,6     | 17,0     | 2,8      | 17,3     | 16,9     | 25,2        | 25,0     | 13,8     | 12,7     | 15,6     | 10,6     | 10,6     | 10,4     | 12,5     | 2,8      | 2,8      |
| 2,8      | 2,8      | 2,8      | 2,8      | 2,8      | 2,8      | 2,8      | 2,8         | 22,3     | 2,8      | 2,8      | 2,8      | 2,8      | 2,8      | 2,8      | 2,8      | 11,9     | 18,6     |
| 2,8      | 2,8      | 19,3     | 2,8      | 20,9     | 34,9     | 12,4     | 2,8         | 14,3     | 12,4     | 25,4     | 13,1     | 14,3     | 7,6      | 10,9     | 11,7     | 2,8      | 2,8      |
| 12,8     | 2,8      | 9,5      | 2,8      | 2,8      | 11,8     | 10,9     | 14,1        | 11,6     | 10,7     | 11,7     | 12,9     | 8,7      | 8,5      | 8,9      | 9,5      | 10,5     | 12,8     |
| 2,8      | 2,8      | 2,8      | 2,8      | 9,4      | 2,8      | 2,8      | 2,8         | 20,6     | 8,5      | 12,1     | 11,9     | 2,8      | 2,8      | 2,8      | 2,8      | 9,4      | 12,1     |
| 13,8     | 2,8      | 9,8      | 11,2     | 12,7     | 2,8      | 9,4      | 8,3         | 2,8      | 10,7     | 2,8      | 11,9     | 2,8      | 2,8      | 2,8      | 2,8      | 2,8      | 2,8      |
| 2,8      | 2,8      | 2,8      | 2,8      | 2,8      | 10,0     | 2,8      | 2,8         | 11,2     | 2,8      | 11,6     | 2,8      | 9,5      | 2,8      | 8,9      | 2,8      | 2,8      | 2,8      |
| 2,8      | 2,8      | 7,4      | 2,8      | 2,8      | 2,8      | 2,8      | 2,8         | 2,8      | 2,8      | 2,8      | 2,8      | 2,8      | 2,8      | 2,8      | 2,8      | 10,2     | 18,0     |
| 2,8      | 2,8      | 2,8      | 2,8      | 9,8      | 2,8      | 2,8      | 2,8         | 2,8      | 2,8      | 2,8      | 2,8      | 2,8      | 8,0      | 2,8      | 2,8      | 2,8      | 8,5      |
| 25,9     | 2,8      | 19,7     | 12,5     | 26,4     | 2,8      | 17,5     | 22,0        | 42,4     | 19,3     | 11,6     | 17,1     | 7,5      | 7,6      | 2,8      | 2,8      | 2,8      | 2,8      |
| 2,8      | 2,8      | 2,8      | 2,8      | 2,8      | 18,0     | 2,8      | 2,8         | 2,8      | 2,8      | 18,2     | 2,8      | 9,5      | 8,9      | 11,4     | 11,2     | 2,8      | 2,8      |
| 2,8      | 2,8      | 7,8      | 2,8      | 10,4     | 2,8      | 8,1      | 2,8         | 15,9     | 9,0      | 2,8      | 2,8      | 2,8      | 2,8      | 2,8      | 2,8      | 13,5     | 19,2     |
| 2,8      | 2,8      | 2,8      | 2,8      | 2,8      | 8,8      | 2,8      | 2,8         | 2,8      | 2,8      | 2,8      | 2,8      | 2,8      | 2,8      | 2,8      | 2,8      | 2,8      | 2,8      |
| 12,0     | 2,8      | 11,1     | 11,6     | 16,2     | 2,8      | 9,9      | 9,0         | 22,4     | 11,8     | 16,5     | 18,8     | 2,8      | 2,8      | 2,8      | 2,8      | 2,8      | 2,8      |
| 2,8      | 2,8      | 2,8      | 10,0     | 12,9     | 8,8      | 2,8      | 2,8         | 2,8      | 2,8      | 2,8      | 2,8      | 8,6      | 2,8      | 10,2     | 2,8      | 2,8      | 2,8      |
| 13,0     | 2,8      | 10,1     | 2,8      | 2,8      | 8,3      | 9,9      | 9,3         | 11,6     | 2,8      | 12,2     | 13,1     | 2,8      | 2,8      | 2,8      | 2,8      | 18,4     | 22,8     |
| 2,8      | 2,8      | 2,8      | 2,8      | 10,6     | 2,8      | 2,8      | 2,8         | 2,8      | 2,8      | 2,8      | 2,8      | 2,8      | 2,8      | 2,8      | 2,8      | 2,8      | 2,8      |
| 13,0     | 2,8      | 18,5     | 10,0     | 12,4     | 10,3     | 9,4      | 8,2         | 29,0     | 20,1     | 2,8      | 16,7     | 7,8      | 8,1      | 7,6      | 8,0      | 7,6      | 8,0      |
| 2,8      | 2,8      | 2,8      | 2,8      | 2,8      | 2,8      | 9,0      | 2,8         | 2,8      | 2,8      | 15,0     | 2,8      | 8,0      | 2,8      | 2,8      | 2,8      | 2,8      | 2,8      |
| 2,8      | 2,8      | 2,8      | 2,8      | 2,8      | 2,8      | 2,8      | 2,8         | 2,8      | 2,8      | 2,8      | 2,8      | 2,8      | 2,8      | 2,8      | 2,8      | 13,9     | 22,8     |
| 9,9      | 2,8      | 7,2      | 2,8      | 2,8      | 2,8      | 8,2      | 7,9         | 2,8      | 2,8      | 2,8      | 2,8      | 2,8      | 2,8      | 2,8      | 2,8      | 2,8      | 2,8      |
| 10,5     | 2,8      | 8,1      | 9,5      | 10,2     | 2,8      | 2,8      | 2,8         | 11,6     | 9,1      | 2,8      | 2,8      | 2,8      | 2,8      | 2,8      | 2,8      | 9,7      | 9,0      |
| 2,8      | 2,8      | 2,8      | 2,8      | 2,8      | 7,8      | 8,0      | 2,8         | 2,8      | 2,8      | 12,6     | 2,8      | 7,7      | 2,8      | 9,5      | 2,8      | 2,8      | 2,8      |
| 20,4     | 2,8      | 16,4     | 8,7      | 20,7     | 8,0      | 13,9     | 17,8        | 12,9     | 10,7     | 2,8      | 16,3     | 2,8      | 16,3     | 2,8      | 13,5     | 2,8      | 11,1     |
| 2,8      | 2,8      | 2,8      | 130,6    | 232,7    | 7,9      | 2,8      | 2,8         | 2,8      | 2,8      | 2,8      | 2,8      | 8,6      | 2,8      | 2,8      | 2,8      | 2,8      | 7,7      |
| 313,9    | 7,0      | 142,9    | 2,8      | 2,8      | 116,6    | 118,0    | 83,9        | 115,2    | 39,7     | 31,7     | 45,8     | 40,4     | 28,5     | 50,8     | 33,9     | 21,4     | 10,5     |
| 2,8      | 2,8      | 11,0     | 2,8      | 2,8      | 2,8      | 2,8      | 2,8         | 2,8      | 2,8      | 14,3     | 16,7     | 2,8      | 2,8      | 8,7      | 2,8      | 56,7     | 92,3     |
| 11,7     | 2,8      | 9,0      | 2,8      | 12,1     | 8,9      | 12,9     | 11,2        | 9,6      | 2,8      | 2,8      | 2,8      | 2,8      | 2,8      | 2,8      | 2,8      | 7,6      | 2,8      |
| 2,8      | 2,8      | 2,8      | 2,8      | 2,8      | 2,8      | 2,8      | 2,8         | 2,8      | 2,8      | 2,8      | 10,4     | 7,7      | 10,3     | 10,9     | 12,1     | 2,8      | 2,8      |
| 2,8      | 2,8      | 10,7     | 10,8     | 12,8     | 2,8      | 2,8      | 2,8         | 2,8      | 14,6     | 10,3     | 22,1     | 2,8      | 2,8      | 2,8      | 2,8      | 2,8      | 2,8      |
| 2,8      | 7,2      | 2,8      | 2,8      | 2,8      | 8,5      | 10,1     | 9,0         | 41,6     | 2,8      | 22,3     | 2,8      | 11,1     | 8,4      | 9,8      | 9,0      | 14,2     | 9,2      |
| 2,8      | 2,8      | 2,8      | 2,8      | 2,8      | 2,8      | 2,8      | 2,8         | 2,8      | 2,8      | 2,8      | 2,8      | 2,8      | 2,8      | 2,8      | 2,8      | 10,3     | 27,3     |
| 2,8      | 2,8      | 2,8      | 2,8      | 2,8      | 2,8      | 2,8      | 2,8         | 9,3      | 2,8      | 11,7     | 2,8      | 2,8      | 2,8      | 2,8      | 2,8      | 2,8      | 2,8      |
| 2,8      | 7,5      | 2,8      | 2,8      | 2,8      | 8,1      | 8,1      | 2,8         | 2,8      | 2,8      | 54,2     | 2,8      | 12,3     | 8,4      | 9,7      | 14,9     | 2,8      | 2,8      |
| 2,8      | 2,8      | 2,8      | 2,8      | 2,8      | 2,8      | 2,8      | 2,8         | 2,8      | 2,8      | 10,7     | 11,0     | 2,8      | 2,8      | 8,6      | 2,8      | 2,8      | 2,8      |
| 11,9     | 2,8      | 2,8      | 2,8      | 2,8      | 2,8      | 2,8      | 12,1        | 11,4     | 2,8      | 11,0     | 2,8      | 2,8      | 2,8      | 14,0     | 13,2     | 2,8      | 2,8      |
| 2,8      | 2,8      | 2,8      | 2,8      | 2,8      | 2,8      | 2,8      | 2,8         | 2,8      | 2,8      | 2,8      | 2,8      | 2,8      | 2,8      | 2,8      | 2,8      | 2,8      | 2,8      |
| 2,8      | 2,8      | 2,8      | 2,8      | 2,8      | 2,8      | 2,8      | 2,8         | 2,8      | 2,8      | 2,8      | 2,8      | 2,8      | 2,8      | 9,0      | 8,9      | 8,2      | 9,7      |
| 2,8      | 2,8      | 2,8      | 2,8      | 2,8      | 9,1      | 2,8      | 2,8         | 2,8      | 2,8      | 13,7     | 2,8      | 8,5      | 8,1      | 2,8      | 2,8      | 2,8      | 2,8      |

|      |     |     |     |      |      |      |     |      |      |      |      |      |      |      |      |     |     |
|------|-----|-----|-----|------|------|------|-----|------|------|------|------|------|------|------|------|-----|-----|
| 2,8  | 2,8 | 2,8 | 2,8 | 2,8  | 2,8  | 2,8  | 2,8 | 2,8  | 2,8  | 18,6 | 2,8  | 10,5 | 9,5  | 8,7  | 2,8  | 2,8 | 2,8 |
| 2,8  | 2,8 | 2,8 | 2,8 | 2,8  | 10,7 | 2,8  | 9,6 | 11,3 | 2,8  | 16,6 | 2,8  | 2,8  | 9,7  | 14,9 | 13,4 | 2,8 | 7,9 |
| 2,8  | 2,8 | 2,8 | 2,8 | 2,8  | 2,8  | 2,8  | 2,8 | 2,8  | 2,8  | 2,8  | 2,8  | 7,7  | 2,8  | 2,8  | 2,8  | 2,8 | 2,8 |
| 2,8  | 2,8 | 2,8 | 2,8 | 2,8  | 9,7  | 2,8  | 2,8 | 2,8  | 2,8  | 12,8 | 12,9 | 2,8  | 7,7  | 2,8  | 2,8  | 2,8 | 2,8 |
| 2,8  | 2,8 | 2,8 | 2,8 | 2,8  | 2,8  | 2,8  | 2,8 | 2,8  | 2,8  | 2,8  | 2,8  | 2,8  | 2,8  | 2,8  | 2,8  | 2,8 | 2,8 |
| 2,8  | 2,8 | 2,8 | 2,8 | 2,8  | 2,8  | 2,8  | 2,8 | 2,8  | 2,8  | 25,9 | 2,8  | 2,8  | 2,8  | 9,4  | 8,9  | 2,8 | 2,8 |
| 2,8  | 2,8 | 2,8 | 2,8 | 2,8  | 9,7  | 2,8  | 2,8 | 9,3  | 2,8  | 12,6 | 2,8  | 7,4  | 7,5  | 2,8  | 2,8  | 2,8 | 2,8 |
| 2,8  | 2,8 | 2,8 | 2,8 | 2,8  | 11,2 | 2,8  | 2,8 | 11,0 | 2,8  | 15,9 | 2,8  | 2,8  | 8,7  | 2,8  | 2,8  | 2,8 | 2,8 |
| 2,8  | 7,5 | 8,7 | 2,8 | 10,5 | 2,8  | 8,8  | 8,3 | 34,8 | 13,1 | 2,8  | 26,4 | 22,2 | 2,8  | 2,8  | 2,8  | 2,8 | 7,5 |
| 2,8  | 2,8 | 2,8 | 2,8 | 2,8  | 15,8 | 2,8  | 2,8 | 2,8  | 2,8  | 79,5 | 2,8  | 27,6 | 12,0 | 14,7 | 11,0 | 2,8 | 2,8 |
| 2,8  | 2,8 | 2,8 | 2,8 | 2,8  | 2,8  | 2,8  | 2,8 | 2,8  | 2,8  | 12,6 | 2,8  | 2,8  | 2,8  | 2,8  | 2,8  | 2,8 | 2,8 |
| 2,8  | 2,8 | 2,8 | 2,8 | 2,8  | 10,9 | 2,8  | 2,8 | 2,8  | 2,8  | 12,7 | 2,8  | 2,8  | 2,8  | 2,8  | 2,8  | 2,8 | 2,8 |
| 13,0 | 8,6 | 2,8 | 2,8 | 2,8  | 15,0 | 2,8  | 9,1 | 2,8  | 11,3 | 2,8  | 17,7 | 2,8  | 2,8  | 2,8  | 2,8  | 2,8 | 2,8 |
| 2,8  | 2,8 | 2,8 | 2,8 | 2,8  | 2,8  | 2,8  | 2,8 | 13,0 | 2,8  | 24,8 | 2,8  | 9,1  | 12,4 | 10,7 | 17,6 | 2,8 | 2,8 |
| 2,8  | 2,8 | 2,8 | 2,8 | 2,8  | 18,5 | 2,8  | 9,8 | 2,8  | 2,8  | 2,8  | 2,8  | 6,8  | 2,8  | 2,8  | 2,8  | 2,8 | 2,8 |
| 9,2  | 2,8 | 7,9 | 2,8 | 2,8  | 2,8  | 2,8  | 2,8 | 2,8  | 2,8  | 2,8  | 2,8  | 2,8  | 2,8  | 2,8  | 2,8  | 2,8 | 2,8 |
| 2,8  | 6,8 | 2,8 | 2,8 | 9,2  | 2,8  | 11,5 | 2,8 | 2,8  | 2,8  | 2,8  | 2,8  | 2,8  | 2,8  | 2,8  | 2,8  | 2,8 | 2,8 |
| 1    | 1   | 1   | 2   | 2    | 2    | 2    | 2   | 2    | 2    | 1    | 1    | 2    | 2    | 1    | 1    | 2   | 2   |



|     |     |     |     |     |     |      |     |     |     |
|-----|-----|-----|-----|-----|-----|------|-----|-----|-----|
| 2,8 | 2,8 | 2,8 | 2,8 | 2,8 | 2,8 | 2,8  | 2,8 | 2,8 | 2,8 |
| 2,8 | 2,8 | 2,8 | 9,3 | 2,8 | 9,5 | 13,0 | 2,8 | 2,8 | 2,8 |
| 2,8 | 2,8 | 2,8 | 2,8 | 2,8 | 2,8 | 2,8  | 2,8 | 2,8 | 2,8 |
| 2,8 | 2,8 | 7,8 | 9,1 | 2,8 | 8,1 | 12,5 | 2,8 | 2,8 | 2,8 |
| 2,8 | 2,8 | 2,8 | 2,8 | 2,8 | 2,8 | 2,8  | 2,8 | 2,8 | 2,8 |
| 2,8 | 2,8 | 2,8 | 2,8 | 2,8 | 2,8 | 2,8  | 2,8 | 2,8 | 2,8 |
| 2,8 | 2,8 | 2,8 | 2,8 | 2,8 | 2,8 | 2,8  | 2,8 | 2,8 | 2,8 |
| 2,8 | 2,8 | 2,8 | 2,8 | 2,8 | 2,8 | 2,8  | 2,8 | 2,8 | 2,8 |
| 2,8 | 2,8 | 2,8 | 2,8 | 2,8 | 2,8 | 12,8 | 2,8 | 2,8 | 2,8 |
| 2,8 | 2,8 | 2,8 | 8,6 | 2,8 | 2,8 | 14,2 | 2,8 | 2,8 | 2,8 |
| 2,8 | 2,8 | 2,8 | 2,8 | 2,8 | 2,8 | 2,8  | 2,8 | 2,8 | 2,8 |
| 2,8 | 2,8 | 2,8 | 2,8 | 2,8 | 2,8 | 2,8  | 2,8 | 2,8 | 2,8 |
| 2,8 | 2,8 | 2,8 | 2,8 | 2,8 | 2,8 | 2,8  | 2,8 | 2,8 | 2,8 |
| 2,8 | 2,8 | 2,8 | 2,8 | 2,8 | 2,8 | 2,8  | 2,8 | 2,8 | 2,8 |
| 2,8 | 2,8 | 2,8 | 2,8 | 2,8 | 2,8 | 2,8  | 2,8 | 2,8 | 2,8 |
| 2,8 | 2,8 | 2,8 | 2,8 | 2,8 | 2,8 | 2,8  | 2,8 | 2,8 | 2,8 |
| 2,8 | 2,8 | 2,8 | 2,8 | 2,8 | 2,8 | 2,8  | 2,8 | 2,8 | 2,8 |
| 2,8 | 2,8 | 2,8 | 2,8 | 2,8 | 2,8 | 2,8  | 2,8 | 2,8 | 2,8 |
| 1   | 1   | 2   | 2   | 1   | 1   | 2    | 2   | 1   | 1   |
