# Supplementary material for: A novel approach to evaluation of adsorbents for sampling indoor volatile organic compounds associated with symptom reports
Source: Royal Society of Chemistry journal article supplement (doi:10.1039/b808654k), 2008-01-01
Supplement: tab_s10.pdf [file tab_s10.pdf]

**Table S10.** Data from samples taken with Chromosorb 106 used in PCA, and PLS-DA models separating cases and controls ( $\mu\text{g}/\text{m}^3$ ).

| Variable<br>Rel RT | Participant<br>Sample | 2<br>A | 2<br>B | 9<br>A | 9<br>B | 17<br>A | 17<br>B | 52<br>A | 52<br>B | 54<br>A | 54<br>B | 61<br>A | 61<br>B | 62<br>A |
|--------------------|-----------------------|--------|--------|--------|--------|---------|---------|---------|---------|---------|---------|---------|---------|---------|
| 51,2               |                       | 10,1   | 10,4   | 9,2    | 2,7    | 8,9     | 12,3    | 2,7     | 11,5    | 19,0    | 10,5    | 11,5    | 10,3    | 9,4     |
| 52,2               |                       | 16,9   | 13,2   | 14,9   | 16,4   | 13,8    | 15,2    | 15,5    | 16,4    | 10,1    | 16,1    | 2,7     | 16,8    | 2,7     |
| 56,2               |                       | 2,7    | 2,7    | 2,7    | 8,2    | 2,7     | 9,1     | 2,7     | 2,7     | 9,9     | 9,5     | 9,7     | 9,3     | 9,4     |
| 56,7               |                       | 9,1    | 2,7    | 2,7    | 2,7    | 2,7     | 12,2    | 2,7     | 2,7     | 12,5    | 10,7    | 11,6    | 9,9     | 10,7    |
| 57,7               |                       | 14,4   | 13,6   | 13,5   | 15,1   | 13,3    | 29,0    | 13,9    | 15,3    | 25,1    | 16,9    | 26,4    | 18,0    | 15,6    |
| 61,7               |                       | 10,0   | 2,7    | 2,7    | 69,1   | 2,7     | 109,0   | 2,7     | 49,8    | 2,7     | 2,7     | 89,9    | 2,7     | 2,7     |
| 64,2               |                       | 2,7    | 2,7    | 9,1    | 2,7    | 18,9    | 59,2    | 2,7     | 2,7     | 14,4    | 16,7    | 2,7     | 15,8    | 13,4    |
| 64,7               |                       | 10,6   | 2,7    | 2,7    | 9,3    | 2,7     | 2,7     | 2,7     | 2,7     | 2,7     | 2,7     | 2,7     | 2,7     | 2,7     |
| 70,7               |                       | 12,4   | 12,0   | 11,8   | 2,7    | 10,7    | 11,5    | 11,4    | 13,6    | 14,5    | 11,9    | 12,8    | 2,7     | 11,4    |
| 71,2               |                       | 2,7    | 2,7    | 2,7    | 10,5   | 2,7     | 2,7     | 2,7     | 2,7     | 2,7     | 2,7     | 2,7     | 12,1    | 2,7     |
| 72,7               |                       | 2,7    | 20,3   | 2,7    | 2,7    | 22,3    | 46,2    | 2,7     | 2,7     | 2,7     | 2,7     | 2,7     | 2,7     | 2,7     |
| 73,2               |                       | 22,6   | 2,7    | 16,9   | 17,8   | 2,7     | 2,7     | 19,5    | 20,3    | 23,0    | 21,2    | 19,9    | 21,0    | 23,0    |
| 75,2               |                       | 9,5    | 10,0   | 2,7    | 2,7    | 7,9     | 2,7     | 2,7     | 2,7     | 2,7     | 2,7     | 2,7     | 2,7     | 2,7     |
| 75,7               |                       | 2,7    | 2,7    | 2,7    | 2,7    | 2,7     | 9,3     | 2,7     | 2,7     | 2,7     | 2,7     | 9,1     | 2,7     | 11,5    |
| 81,7               |                       | 16,2   | 14,1   | 12,8   | 15,4   | 15,0    | 25,4    | 12,9    | 13,8    | 12,7    | 15,9    | 18,5    | 16,0    | 15,8    |
| 88,7               |                       | 2,7    | 2,7    | 2,7    | 2,7    | 2,7     | 9,9     | 2,7     | 2,7     | 9,8     | 2,7     | 9,4     | 2,7     | 2,7     |
| 96,2               |                       | 2,7    | 2,7    | 2,7    | 2,7    | 2,7     | 2,7     | 2,7     | 2,7     | 2,7     | 2,7     | 2,7     | 2,7     | 11,0    |
| 100,2              |                       | 36,6   | 30,2   | 20,0   | 22,1   | 23,3    | 44,4    | 31,6    | 30,2    | 22,9    | 25,0    | 21,1    | 23,1    | 22,6    |
| 105,2              |                       | 14,1   | 11,8   | 2,7    | 19,0   | 15,4    | 2,7     | 2,7     | 2,7     | 31,1    | 2,7     | 21,8    | 2,7     | 2,7     |
| 105,7              |                       | 2,7    | 9,0    | 13,9   | 2,7    | 2,7     | 2,7     | 2,7     | 9,1     | 2,7     | 17,8    | 2,7     | 13,6    | 2,7     |
| 106,7              |                       | 10,5   | 2,7    | 9,9    | 10,8   | 9,7     | 8,2     | 2,7     | 2,7     | 2,7     | 11,1    | 2,7     | 11,0    | 11,6    |
| 107,7              |                       | 12,5   | 13,1   | 10,6   | 11,7   | 14,8    | 34,5    | 12,0    | 11,2    | 11,9    | 15,7    | 10,0    | 14,5    | 12,5    |
| 110,7              |                       | 16,9   | 2,7    | 2,7    | 2,7    | 2,7     | 2,7     | 11,2    | 12,1    | 2,7     | 2,7     | 2,7     | 13,2    | 2,7     |
| 111,2              |                       | 2,7    | 10,7   | 9,9    | 10,9   | 12,1    | 23,7    | 2,7     | 2,7     | 19,0    | 18,2    | 12,9    | 2,7     | 10,8    |
| 111,7              |                       | 2,7    | 2,7    | 2,7    | 2,7    | 2,7     | 2,7     | 2,7     | 2,7     | 2,7     | 2,7     | 2,7     | 2,7     | 2,7     |
| 112,2              |                       | 53,0   | 52,5   | 70,6   | 58,3   | 56,0    | 14,9    | 51,0    | 59,3    | 17,2    | 71,8    | 16,8    | 73,0    | 12,7    |
| 122,7              |                       | 2,7    | 2,7    | 2,7    | 2,7    | 2,7     | 7,3     | 2,7     | 2,7     | 2,7     | 2,7     | 2,7     | 2,7     | 2,7     |
| 123,2              |                       | 13,6   | 13,0   | 10,1   | 10,9   | 10,5    | 17,2    | 13,0    | 13,1    | 11,7    | 11,6    | 15,7    | 11,5    | 11,5    |
| 124,7              |                       | 22,9   | 20,2   | 14,7   | 16,2   | 17,8    | 30,0    | 21,0    | 20,6    | 15,3    | 16,7    | 17,0    | 17,0    | 16,7    |
| 129,2              |                       | 2,7    | 2,7    | 2,7    | 2,7    | 2,7     | 2,7     | 2,7     | 2,7     | 2,7     | 2,7     | 2,7     | 2,7     | 2,7     |
| 129,7              |                       | 22,7   | 16,4   | 16,8   | 22,1   | 37,5    | 44,2    | 22,9    | 36,3    | 19,1    | 19,5    | 21,5    | 16,2    | 31,7    |
| 130,2              |                       | 13,8   | 12,7   | 10,2   | 11,4   | 10,4    | 15,6    | 13,9    | 13,7    | 10,4    | 10,9    | 10,4    | 11,4    | 11,4    |
| 130,7              |                       | 8,3    | 8,4    | 2,7    | 7,2    | 2,7     | 12,1    | 2,7     | 2,7     | 2,7     | 8,1     | 2,7     | 9,1     | 8,8     |
| 131,2              |                       | 2,7    | 2,7    | 2,7    | 2,7    | 6,7     | 8,4     | 2,7     | 2,7     | 2,7     | 2,7     | 2,7     | 8,4     | 8,9     |
| 131,7              |                       | 2,7    | 2,7    | 2,7    | 2,7    | 2,7     | 2,7     | 2,7     | 2,7     | 2,7     | 2,7     | 2,7     | 2,7     | 2,7     |
| 138,7              |                       | 2,7    | 2,7    | 2,7    | 2,7    | 2,7     | 2,7     | 2,7     | 2,7     | 2,7     | 2,7     | 2,7     | 2,7     | 2,7     |
| 139,2              |                       | 10,4   | 10,2   | 25,3   | 11,7   | 8,3     | 12,1    | 10,3    | 9,9     | 9,9     | 9,8     | 9,2     | 20,4    | 17,6    |
| 139,7              |                       | 16,2   | 11,4   | 2,7    | 12,7   | 11,0    | 7,6     | 12,2    | 12,7    | 9,5     | 11,6    | 9,6     | 2,7     | 2,7     |
| 141,7              |                       | 2,7    | 2,7    | 2,7    | 2,7    | 2,7     | 2,7     | 2,7     | 2,7     | 11,7    | 2,7     | 11,1    | 2,7     | 9,5     |
| 142,7              |                       | 2,7    | 2,7    | 8,3    | 2,7    | 2,7     | 2,7     | 2,7     | 2,7     | 2,7     | 2,7     | 2,7     | 2,7     | 8,9     |
| 143,2              |                       | 9,9    | 9,4    | 2,7    | 8,7    | 8,1     | 8,9     | 10,1    | 10,2    | 2,7     | 9,2     | 9,0     | 2,7     | 2,7     |
| 144,2              |                       | 2,7    | 2,7    | 2,7    | 2,7    | 2,7     | 2,7     | 2,7     | 2,7     | 2,7     | 2,7     | 2,7     | 2,7     | 2,7     |
| 144,7              |                       | 32,3   | 28,1   | 30,5   | 30,0   | 35,3    | 60,6    | 27,2    | 33,2    | 39,0    | 32,0    | 46,0    | 34,7    | 39,8    |
| 145,2              |                       | 2,7    | 2,7    | 2,7    | 2,7    | 2,7     | 2,7     | 2,7     | 2,7     | 2,7     | 2,7     | 2,7     | 2,7     | 2,7     |
| 145,7              |                       | 10,3   | 9,4    | 8,9    | 8,6    | 7,9     | 9,9     | 10,5    | 10,2    | 8,7     | 9,8     | 8,7     | 9,3     | 9,5     |
| 146,7              |                       | 2,7    | 2,7    | 2,7    | 2,7    | 2,7     | 10,6    | 2,7     | 2,7     | 2,7     | 2,7     | 2,7     | 2,7     | 2,7     |
| 147,7              |                       | 2,7    | 2,7    | 19,4   | 17,9   | 2,7     | 2,7     | 2,7     | 2,7     | 2,7     | 24,9    | 2,7     | 22,0    | 2,7     |
| 148,2              |                       | 23,7   | 21,3   | 2,7    | 2,7    | 15,5    | 17,6    | 17,4    | 15,9    | 14,0    | 2,7     | 15,3    | 2,7     | 14,4    |
| 148,7              |                       | 2,7    | 2,7    | 2,7    | 2,7    | 2,7     | 7,8     | 2,7     | 2,7     | 2,7     | 2,7     | 2,7     | 2,7     | 2,7     |
| 149,7              |                       | 9,7    | 10,8   | 10,8   | 11,1   | 14,5    | 21,7    | 2,7     | 13,3    | 10,4    | 13,1    | 10,8    | 11,5    | 14,3    |
| 150,2              |                       | 9,3    | 8,8    | 8,5    | 8,8    | 8,1     | 9,0     | 9,2     | 9,2     | 8,6     | 9,2     | 8,4     | 8,6     | 8,5     |
| 150,7              |                       | 2,7    | 2,7    | 2,7    | 2,7    | 2,7     | 2,7     | 2,7     | 2,7     | 2,7     | 2,7     | 2,7     | 18,4    | 20,3    |
| 151,2              |                       | 19,6   | 17,6   | 14,7   | 15,2   | 13,8    | 33,0    | 42,0    | 37,5    | 15,5    | 18,3    | 17,7    | 25,7    | 2,7     |

|       |       |       |       |       |      |       |       |       |       |       |       |       |       |
|-------|-------|-------|-------|-------|------|-------|-------|-------|-------|-------|-------|-------|-------|
| 151,7 | 23,7  | 22,2  | 22,5  | 19,4  | 17,6 | 12,4  | 2,7   | 2,7   | 7,9   | 24,0  | 16,9  | 2,7   | 16,0  |
| 153,7 | 2,7   | 2,7   | 2,7   | 2,7   | 2,7  | 2,7   | 2,7   | 2,7   | 2,7   | 2,7   | 2,7   | 2,7   | 2,7   |
| 154,2 | 9,9   | 9,3   | 9,6   | 8,6   | 7,4  | 9,9   | 2,7   | 2,7   | 9,0   | 9,5   | 2,7   | 8,9   | 2,7   |
| 155,2 | 2,7   | 2,7   | 2,7   | 2,7   | 7,2  | 2,7   | 2,7   | 2,7   | 2,7   | 2,7   | 2,7   | 2,7   | 2,7   |
| 155,7 | 15,5  | 14,6  | 14,1  | 14,2  | 14,2 | 28,5  | 11,6  | 12,3  | 20,0  | 17,3  | 12,0  | 15,6  | 17,7  |
| 156,2 | 2,7   | 2,7   | 2,7   | 2,7   | 2,7  | 2,7   | 2,7   | 2,7   | 2,7   | 2,7   | 2,7   | 2,7   | 2,7   |
| 156,7 | 10,5  | 11,0  | 10,6  | 17,0  | 2,7  | 13,6  | 10,2  | 10,9  | 12,4  | 18,7  | 8,8   | 9,5   | 17,2  |
| 157,2 | 2,7   | 2,7   | 2,7   | 2,7   | 10,3 | 2,7   | 2,7   | 2,7   | 2,7   | 2,7   | 2,7   | 35,2  | 44,8  |
| 157,7 | 42,1  | 56,3  | 162,7 | 140,7 | 30,0 | 31,0  | 34,0  | 31,8  | 32,8  | 33,8  | 30,2  | 2,7   | 2,7   |
| 158,2 | 2,7   | 2,7   | 2,7   | 2,7   | 2,7  | 2,7   | 2,7   | 2,7   | 2,7   | 2,7   | 2,7   | 2,7   | 2,7   |
| 158,7 | 9,0   | 2,7   | 12,2  | 11,0  | 2,7  | 8,8   | 2,7   | 2,7   | 13,0  | 15,1  | 2,7   | 2,7   | 2,7   |
| 161,2 | 9,7   | 2,7   | 2,7   | 11,3  | 7,3  | 10,7  | 2,7   | 2,7   | 9,0   | 2,7   | 2,7   | 8,8   | 2,7   |
| 164,7 | 9,4   | 9,1   | 8,6   | 9,0   | 8,9  | 15,1  | 9,6   | 10,3  | 10,2  | 9,7   | 9,4   | 9,0   | 9,7   |
| 165,2 | 10,4  | 10,4  | 9,3   | 9,3   | 9,0  | 2,7   | 10,8  | 10,8  | 2,7   | 10,9  | 2,7   | 10,2  | 2,7   |
| 166,2 | 2,7   | 2,7   | 2,7   | 2,7   | 2,7  | 10,3  | 2,7   | 2,7   | 11,2  | 2,7   | 11,4  | 2,7   | 10,5  |
| 166,7 | 2,7   | 8,8   | 2,7   | 2,7   | 2,7  | 2,7   | 2,7   | 2,7   | 9,3   | 9,0   | 9,3   | 8,4   | 8,3   |
| 167,2 | 9,1   | 2,7   | 2,7   | 2,7   | 7,2  | 8,9   | 2,7   | 2,7   | 2,7   | 2,7   | 2,7   | 2,7   | 2,7   |
| 167,7 | 132,9 | 122,9 | 111,1 | 91,5  | 93,5 | 128,6 | 156,1 | 115,3 | 116,0 | 133,9 | 120,5 | 116,1 | 129,8 |
| 168,2 | 11,4  | 10,6  | 2,7   | 2,7   | 9,0  | 2,7   | 2,7   | 2,7   | 2,7   | 2,7   | 2,7   | 2,7   | 2,7   |
| 168,7 | 2,7   | 2,7   | 2,7   | 2,7   | 2,7  | 2,7   | 2,7   | 2,7   | 2,7   | 2,7   | 2,7   | 2,7   | 2,7   |
| 169,2 | 132,6 | 124,5 | 110,8 | 83,2  | 95,5 | 90,0  | 133,8 | 109,7 | 73,9  | 128,2 | 79,0  | 125,0 | 75,2  |
| 172,2 | 2,7   | 2,7   | 2,7   | 2,7   | 2,7  | 2,7   | 2,7   | 2,7   | 2,7   | 2,7   | 2,7   | 2,7   | 2,7   |
| 172,7 | 34,0  | 30,6  | 29,9  | 24,6  | 27,3 | 25,5  | 43,7  | 30,2  | 23,6  | 34,7  | 23,5  | 27,1  | 26,4  |
| 174,7 | 2,7   | 2,7   | 24,1  | 2,7   | 2,7  | 2,7   | 2,7   | 2,7   | 2,7   | 2,7   | 2,7   | 22,0  | 22,2  |
| 175,2 | 2,7   | 2,7   | 2,7   | 26,3  | 21,7 | 27,5  | 2,7   | 2,7   | 27,0  | 27,0  | 26,3  | 2,7   | 2,7   |
| 175,7 | 2,7   | 2,7   | 2,7   | 2,7   | 2,7  | 2,7   | 2,7   | 2,7   | 2,7   | 2,7   | 2,7   | 2,7   | 2,7   |
| 176,2 | 2,7   | 2,7   | 10,7  | 9,2   | 2,7  | 2,7   | 2,7   | 2,7   | 2,7   | 2,7   | 2,7   | 2,7   | 9,0   |
| 176,7 | 2,7   | 2,7   | 11,7  | 2,7   | 7,4  | 2,7   | 2,7   | 2,7   | 2,7   | 2,7   | 2,7   | 9,5   | 10,6  |
| 177,2 | 10,6  | 10,3  | 2,7   | 9,4   | 9,0  | 8,8   | 11,2  | 10,2  | 9,5   | 10,5  | 9,6   | 2,7   | 2,7   |
| 178,7 | 2,7   | 2,7   | 10,2  | 2,7   | 11,4 | 2,7   | 2,7   | 2,7   | 2,7   | 2,7   | 18,7  | 2,7   | 9,1   |
| 179,2 | 2,7   | 2,7   | 7,5   | 2,7   | 11,3 | 9,7   | 2,7   | 2,7   | 18,0  | 16,6  | 2,7   | 2,7   | 2,7   |
| 179,7 | 2,7   | 2,7   | 2,7   | 2,7   | 2,7  | 8,2   | 2,7   | 2,7   | 12,5  | 10,9  | 2,7   | 2,7   | 2,7   |
| 180,2 | 18,2  | 12,2  | 22,0  | 14,4  | 15,1 | 13,7  | 10,1  | 12,5  | 15,0  | 15,2  | 16,3  | 2,7   | 2,7   |
| 181,2 | 2,7   | 20,1  | 39,3  | 2,7   | 2,7  | 2,7   | 2,7   | 2,7   | 2,7   | 44,5  | 41,5  | 41,5  | 36,7  |
| 181,7 | 39,3  | 22,5  | 2,7   | 27,4  | 35,0 | 34,2  | 33,7  | 33,3  | 49,3  | 2,7   | 2,7   | 2,7   | 2,7   |
| 182,2 | 2,7   | 2,7   | 10,5  | 8,7   | 2,7  | 2,7   | 2,7   | 2,7   | 2,7   | 2,7   | 2,7   | 2,7   | 8,5   |
| 182,7 | 16,3  | 10,9  | 24,9  | 15,3  | 2,7  | 2,7   | 16,4  | 16,7  | 2,7   | 14,5  | 12,7  | 12,7  | 11,8  |
| 183,7 | 2,7   | 2,7   | 2,7   | 2,7   | 2,7  | 2,7   | 2,7   | 2,7   | 2,7   | 2,7   | 2,7   | 2,7   | 2,7   |
| 184,2 | 34,3  | 31,7  | 32,8  | 25,5  | 2,7  | 27,0  | 32,0  | 31,2  | 29,1  | 38,6  | 26,9  | 31,4  | 29,4  |
| 185,2 | 2,7   | 2,7   | 2,7   | 2,7   | 2,7  | 2,7   | 2,7   | 2,7   | 2,7   | 2,7   | 2,7   | 2,7   | 2,7   |
| 185,7 | 2,7   | 2,7   | 18,6  | 2,7   | 2,7  | 2,7   | 2,7   | 2,7   | 2,7   | 15,2  | 14,8  | 18,5  | 21,0  |
| 186,2 | 33,4  | 30,7  | 11,9  | 21,5  | 15,5 | 29,0  | 31,8  | 31,4  | 26,1  | 13,8  | 12,7  | 12,8  | 13,1  |
| 186,7 | 11,0  | 10,3  | 11,4  | 11,9  | 23,7 | 14,5  | 2,7   | 2,7   | 13,9  | 12,3  | 12,6  | 11,1  | 10,3  |
| 187,2 | 2,7   | 2,7   | 10,1  | 2,7   | 2,7  | 2,7   | 2,7   | 2,7   | 2,7   | 2,7   | 2,7   | 10,2  | 12,0  |
| 187,7 | 10,8  | 9,5   | 2,7   | 9,3   | 9,3  | 9,7   | 12,1  | 11,3  | 9,7   | 11,6  | 10,3  | 2,7   | 2,7   |
| 189,7 | 12,2  | 10,2  | 10,4  | 9,6   | 9,1  | 8,9   | 12,3  | 10,9  | 10,5  | 12,7  | 10,0  | 11,2  | 9,5   |
| 192,2 | 2,7   | 2,7   | 2,7   | 2,7   | 2,7  | 2,7   | 2,7   | 2,7   | 2,7   | 2,7   | 2,7   | 2,7   | 2,7   |
| 192,7 | 2,7   | 2,7   | 72,6  | 66,9  | 2,7  | 71,5  | 60,0  | 2,7   | 2,7   | 81,5  | 153,6 | 90,9  | 84,3  |
| 193,2 | 49,4  | 51,7  | 2,7   | 2,7   | 62,4 | 2,7   | 2,7   | 54,4  | 80,3  | 2,7   | 2,7   | 2,7   | 2,7   |
| 193,7 | 2,7   | 2,7   | 2,7   | 2,7   | 2,7  | 2,7   | 2,7   | 2,7   | 2,7   | 2,7   | 2,7   | 2,7   | 2,7   |
| 194,2 | 2,7   | 2,7   | 2,7   | 2,7   | 2,7  | 2,7   | 2,7   | 2,7   | 2,7   | 2,7   | 17,7  | 2,7   | 17,4  |
| 194,7 | 10,6  | 10,1  | 2,7   | 12,2  | 7,7  | 15,2  | 9,0   | 19,2  | 15,5  | 10,6  | 2,7   | 2,7   | 2,7   |
| 196,7 | 2,7   | 2,7   | 14,2  | 2,7   | 2,7  | 2,7   | 2,7   | 2,7   | 2,7   | 2,7   | 2,7   | 14,1  | 15,4  |
| 197,2 | 12,5  | 15,4  | 2,7   | 11,5  | 11,9 | 11,0  | 12,0  | 15,2  | 17,5  | 15,8  | 15,3  | 2,7   | 2,7   |
| 198,2 | 9,2   | 10,2  | 9,2   | 9,0   | 8,2  | 8,0   | 2,7   | 2,7   | 11,5  | 10,9  | 11,3  | 11,4  | 11,8  |
| 199,2 | 2,7   | 2,7   | 9,1   | 8,8   | 2,7  | 2,7   | 9,5   | 2,7   | 2,7   | 2,7   | 2,7   | 2,7   | 2,7   |
| 200,2 | 12,0  | 12,7  | 12,8  | 9,7   | 10,7 | 8,8   | 12,8  | 12,9  | 11,7  | 13,2  | 10,6  | 11,3  | 12,9  |
| 201,2 | 10,1  | 2,7   | 10,3  | 2,7   | 2,7  | 2,7   | 11,7  | 13,5  | 10,3  | 12,9  | 9,9   | 11,8  | 12,0  |
| 204,7 | 2,7   | 2,7   | 7,6   | 9,9   | 2,7  | 2,7   | 9,4   | 9,7   | 9,8   | 9,3   | 8,2   | 8,7   | 9,0   |

|       |      |      |      |      |      |      |      |      |      |      |      |      |      |
|-------|------|------|------|------|------|------|------|------|------|------|------|------|------|
| 206,2 | 2,7  | 10,3 | 2,7  | 2,7  | 2,7  | 11,8 | 2,7  | 17,0 | 12,1 | 8,7  | 8,1  | 10,4 | 11,0 |
| 207,7 | 2,7  | 2,7  | 2,7  | 2,7  | 7,4  | 2,7  | 2,7  | 2,7  | 2,7  | 9,3  | 2,7  | 2,7  | 2,7  |
| 208,2 | 2,7  | 2,7  | 9,5  | 2,7  | 2,7  | 2,7  | 2,7  | 13,2 | 2,7  | 11,7 | 8,2  | 2,7  | 8,7  |
| 211,7 | 10,8 | 18,7 | 10,4 | 2,7  | 2,7  | 2,7  | 2,7  | 10,0 | 8,8  | 12,1 | 8,6  | 19,3 | 20,6 |
| 212,2 | 13,2 | 14,2 | 13,0 | 14,7 | 23,9 | 9,7  | 16,2 | 16,2 | 19,7 | 17,0 | 15,5 | 2,7  | 2,7  |
| 212,7 | 2,7  | 2,7  | 2,7  | 2,7  | 2,7  | 2,7  | 2,7  | 2,7  | 2,7  | 2,7  | 2,7  | 2,7  | 2,7  |
| 213,2 | 2,7  | 9,1  | 8,6  | 2,7  | 2,7  | 2,7  | 11,1 | 10,3 | 8,9  | 8,9  | 2,7  | 8,5  | 10,1 |
| 213,7 | 8,9  | 2,7  | 2,7  | 8,0  | 8,3  | 2,7  | 2,7  | 2,7  | 2,7  | 2,7  | 2,7  | 2,7  | 2,7  |
| 221,2 | 2,7  | 2,7  | 2,7  | 2,7  | 2,7  | 2,7  | 2,7  | 2,7  | 2,7  | 2,7  | 2,7  | 2,7  | 2,7  |
| 221,7 | 2,7  | 13,2 | 12,9 | 2,7  | 2,7  | 2,7  | 18,5 | 17,6 | 2,7  | 14,0 | 16,0 | 15,4 | 19,4 |
| 223,2 | 2,7  | 2,7  | 2,7  | 2,7  | 2,7  | 2,7  | 2,7  | 2,7  | 2,7  | 2,7  | 2,7  | 2,7  | 2,7  |
| 223,7 | 16,5 | 15,8 | 14,3 | 11,6 | 2,7  | 16,5 | 15,7 | 35,4 | 10,7 | 14,0 | 20,3 | 16,1 | 24,9 |
| 224,7 | 2,7  | 2,7  | 2,7  | 2,7  | 2,7  | 2,7  | 2,7  | 2,7  | 2,7  | 2,7  | 2,7  | 2,7  | 2,7  |
| 225,2 | 2,7  | 21,8 | 24,1 | 2,7  | 2,7  | 2,7  | 38,9 | 35,5 | 2,7  | 24,9 | 17,5 | 25,0 | 31,2 |
| 226,2 | 2,7  | 2,7  | 2,7  | 2,7  | 2,7  | 2,7  | 2,7  | 2,7  | 2,7  | 2,7  | 2,7  | 2,7  | 2,7  |
| 226,7 | 2,7  | 8,9  | 8,3  | 7,8  | 2,7  | 2,7  | 10,4 | 12,0 | 2,7  | 2,7  | 8,2  | 20,0 | 23,9 |
| 227,2 | 9,8  | 10,4 | 9,1  | 6,9  | 19,8 | 2,7  | 12,3 | 15,6 | 2,7  | 10,7 | 9,9  | 2,7  | 2,7  |
| 227,7 | 2,7  | 8,3  | 8,0  | 2,7  | 2,7  | 2,7  | 2,7  | 2,7  | 2,7  | 2,7  | 2,7  | 12,3 | 12,4 |
| 228,2 | 2,7  | 2,7  | 2,7  | 2,7  | 14,5 | 2,7  | 10,8 | 17,1 | 2,7  | 8,7  | 8,9  | 2,7  | 2,7  |
| 231,7 | 2,7  | 2,7  | 2,7  | 2,7  | 2,7  | 2,7  | 2,7  | 2,7  | 2,7  | 2,7  | 2,7  | 12,1 | 9,4  |
| 232,2 | 9,8  | 9,2  | 7,9  | 12,0 | 13,4 | 7,1  | 14,7 | 24,5 | 10,4 | 12,9 | 11,0 | 2,7  | 2,7  |
| 241,2 | 2,7  | 2,7  | 2,7  | 2,7  | 2,7  | 2,7  | 2,7  | 2,7  | 2,7  | 2,7  | 2,7  | 2,7  | 2,7  |
| 241,7 | 9,6  | 11,2 | 10,6 | 2,7  | 2,7  | 2,7  | 12,4 | 11,4 | 2,7  | 11,1 | 9,6  | 11,1 | 12,4 |
| 242,2 | 13,0 | 18,8 | 21,4 | 12,6 | 10,5 | 2,7  | 24,3 | 36,9 | 13,3 | 22,3 | 20,4 | 24,0 | 34,7 |
| 243,2 | 2,7  | 2,7  | 2,7  | 2,7  | 2,7  | 2,7  | 2,7  | 2,7  | 2,7  | 2,7  | 2,7  | 2,7  | 10,2 |
| 243,7 | 2,7  | 2,7  | 2,7  | 2,7  | 2,7  | 2,7  | 2,7  | 2,7  | 2,7  | 2,7  | 2,7  | 2,7  | 53,9 |
| 244,2 | 31,5 | 44,3 | 34,9 | 16,8 | 2,7  | 10,1 | 65,5 | 70,4 | 18,1 | 30,5 | 37,1 | 36,1 | 2,7  |
| 252,7 | 9,5  | 11,5 | 14,7 | 2,7  | 8,9  | 2,7  | 11,4 | 12,9 | 2,7  | 9,4  | 10,7 | 2,7  | 2,7  |
| 258,2 | 2,7  | 2,7  | 11,4 | 2,7  | 2,7  | 2,7  | 2,7  | 2,7  | 2,7  | 2,7  | 2,7  | 12,3 | 11,9 |
| 258,7 | 8,4  | 10,8 | 2,7  | 2,7  | 10,8 | 2,7  | 12,3 | 11,4 | 2,7  | 11,6 | 11,3 | 2,7  | 2,7  |
| 259,7 | 2,7  | 2,7  | 7,2  | 2,7  | 2,7  | 2,7  | 2,7  | 2,7  | 2,7  | 8,3  | 9,8  | 9,6  | 8,2  |
| 278   | 2,7  | 2,7  | 11,3 | 2,7  | 2,7  | 2,7  | 2,7  | 2,7  | 2,7  | 2,7  | 2,7  | 11,0 | 10,8 |
| 279   | 2,7  | 2,7  | 8,7  | 2,7  | 12,8 | 2,7  | 14,1 | 22,1 | 2,7  | 13,9 | 18,7 | 10,4 | 12,1 |
| 284   | 2,7  | 2,7  | 2,7  | 2,7  | 2,7  | 2,7  | 2,7  | 2,7  | 2,7  | 2,7  | 2,7  | 2,7  | 2,7  |
| 284   | 2,7  | 12,0 | 13,0 | 2,7  | 2,7  | 2,7  | 26,8 | 23,7 | 2,7  | 2,7  | 12,8 | 11,2 | 12,9 |
| 301   | 2,7  | 2,7  | 2,7  | 2,7  | 2,7  | 2,7  | 8,9  | 2,7  | 2,7  | 2,7  | 2,7  | 11,6 | 15,0 |
| 301   | 17,9 | 13,2 | 15,0 | 7,9  | 2,7  | 7,4  | 10,3 | 14,1 | 9,5  | 18,7 | 12,2 | 2,7  | 2,7  |
| 302   | 2,7  | 7,6  | 2,7  | 6,8  | 7,1  | 6,0  | 2,7  | 8,2  | 2,7  | 2,7  | 2,7  | 2,7  | 7,6  |
| 320   | 16,9 | 8,3  | 2,7  | 10,8 | 2,7  | 7,8  | 17,0 | 17,0 | 2,7  | 2,7  | 7,3  | 2,7  | 2,7  |
| 320   | 2,7  | 2,7  | 12,2 | 13,2 | 2,7  | 6,5  | 2,7  | 2,7  | 2,7  | 2,7  | 2,7  | 17,9 | 12,3 |
| 321   | 10,8 | 2,7  | 9,9  | 2,7  | 16,9 | 2,7  | 2,7  | 2,7  | 19,9 | 19,5 | 15,6 | 2,7  | 13,6 |
| 325   | 9,9  | 14,9 | 7,4  | 8,3  | 2,7  | 10,3 | 12,7 | 17,9 | 2,7  | 6,8  | 2,7  | 5,7  | 6,5  |

Case-1, Cont-2

|   |   |   |   |   |   |   |   |   |   |   |   |   |   |
|---|---|---|---|---|---|---|---|---|---|---|---|---|---|
| 1 | 1 | 1 | 1 | 1 | 1 | 1 | 2 | 2 | 2 | 2 | 2 | 2 | 1 |
|---|---|---|---|---|---|---|---|---|---|---|---|---|---|

| 62<br>B | 95<br>A | 95<br>B | 112<br>A | 112<br>B | 123<br>A | 123<br>B | 126<br>A | 126<br>B | 145<br>A | 145<br>B | 148<br>A | 148<br>B | 155<br>A | 155<br>B | 168<br>A |
|---------|---------|---------|----------|----------|----------|----------|----------|----------|----------|----------|----------|----------|----------|----------|----------|
| 2,7     | 2,7     | 2,7     | 2,7      | 2,7      | 8,8      | 13,6     | 2,7      | 2,7      | 2,7      | 2,7      | 10,8     | 2,7      | 2,7      | 2,7      | 13,2     |
| 8,4     | 22,1    | 8,2     | 2,7      | 31,9     | 13,9     | 13,0     | 11,8     | 12,6     | 14,1     | 12,5     | 13,0     | 2,7      | 13,5     | 2,7      | 2,7      |
| 9,5     | 2,7     | 8,9     | 2,7      | 2,7      | 7,7      | 7,8      | 8,4      | 2,7      | 2,7      | 2,7      | 8,8      | 8,7      | 2,7      | 2,7      | 2,7      |
| 10,9    | 12,7    | 9,7     | 2,7      | 2,7      | 8,6      | 11,8     | 17,0     | 2,7      | 2,7      | 2,7      | 10,9     | 9,7      | 10,6     | 2,7      | 2,7      |
| 21,0    | 18,6    | 16,7    | 29,8     | 15,3     | 16,9     | 27,1     | 25,3     | 12,2     | 12,1     | 11,7     | 14,8     | 12,5     | 16,1     | 10,6     | 2,7      |
| 2,7     | 2,7     | 2,7     | 2,7      | 2,7      | 83,9     | 88,8     | 2,7      | 9,2      | 2,7      | 10,0     | 10,1     | 2,7      | 2,7      | 2,7      | 8,4      |
| 16,6    | 67,1    | 18,6    | 13,0     | 2,7      | 18,1     | 26,9     | 2,7      | 2,7      | 2,7      | 2,7      | 2,7      | 19,2     | 2,7      | 2,7      | 2,7      |
| 2,7     | 2,7     | 2,7     | 2,7      | 2,7      | 2,7      | 2,7      | 10,2     | 2,7      | 2,7      | 2,7      | 31,2     | 2,7      | 22,4     | 11,9     | 46,6     |
| 13,0    | 2,7     | 13,1    | 16,2     | 13,2     | 9,5      | 10,6     | 12,4     | 10,1     | 10,4     | 8,9      | 2,7      | 2,7      | 2,7      | 2,7      | 2,7      |
| 2,7     | 10,8    | 2,7     | 2,7      | 2,7      | 2,7      | 2,7      | 2,7      | 2,7      | 2,7      | 2,7      | 10,5     | 9,8      | 10,2     | 2,7      | 8,8      |
| 2,7     | 51,5    | 2,7     | 29,7     | 45,0     | 2,7      | 31,5     | 22,4     | 16,7     | 18,7     | 16,9     | 2,7      | 72,4     | 60,1     | 46,4     | 2,7      |
| 27,2    | 2,7     | 23,5    | 2,7      | 2,7      | 20,8     | 2,7      | 2,7      | 2,7      | 2,7      | 2,7      | 253,4    | 2,7      | 2,7      | 2,7      | 22,3     |
| 11,5    | 2,7     | 2,7     | 11,6     | 2,7      | 2,7      | 11,1     | 9,3      | 2,7      | 2,7      | 2,7      | 2,7      | 2,7      | 2,7      | 2,7      | 2,7      |
| 2,7     | 10,0    | 2,7     | 2,7      | 2,7      | 8,7      | 2,7      | 2,7      | 2,7      | 7,9      | 2,7      | 14,9     | 10,5     | 15,5     | 11,7     | 7,7      |
| 22,1    | 28,2    | 15,6    | 20,5     | 26,8     | 16,2     | 23,7     | 15,6     | 13,2     | 11,3     | 10,1     | 18,1     | 14,6     | 21,9     | 15,2     | 10,7     |
| 10,0    | 11,0    | 8,8     | 11,7     | 2,7      | 7,4      | 8,9      | 9,0      | 2,7      | 2,7      | 2,7      | 9,9      | 2,7      | 2,7      | 2,7      | 2,7      |
| 10,2    | 2,7     | 2,7     | 2,7      | 2,7      | 6,3      | 2,7      | 2,7      | 2,7      | 2,7      | 2,7      | 8,2      | 2,7      | 22,0     | 22,2     | 2,7      |
| 24,1    | 51,7    | 26,6    | 45,2     | 69,5     | 23,0     | 30,9     | 30,5     | 27,9     | 27,7     | 26,0     | 35,1     | 27,5     | 29,7     | 22,0     | 22,1     |
| 15,4    | 8,9     | 2,7     | 2,7      | 2,7      | 2,7      | 2,7      | 2,7      | 2,7      | 12,9     | 2,7      | 2,7      | 2,7      | 2,7      | 2,7      | 2,7      |
| 2,7     | 2,7     | 14,7    | 2,7      | 2,7      | 11,5     | 2,7      | 2,7      | 9,1      | 2,7      | 2,7      | 2,7      | 2,7      | 2,7      | 2,7      | 12,2     |
| 11,4    | 11,6    | 11,4    | 12,9     | 2,7      | 8,4      | 2,7      | 2,7      | 2,7      | 9,5      | 2,7      | 2,7      | 2,7      | 2,7      | 2,7      | 7,9      |
| 14,2    | 46,3    | 14,9    | 14,0     | 26,0     | 14,2     | 18,2     | 12,1     | 10,7     | 11,2     | 10,3     | 22,2     | 12,1     | 2,7      | 12,1     | 9,4      |
| 12,8    | 2,7     | 13,0    | 28,2     | 47,0     | 11,4     | 2,7      | 10,1     | 2,7      | 2,7      | 2,7      | 636,3    | 166,3    | 124,2    | 106,8    | 29,9     |
| 2,7     | 27,1    | 2,7     | 2,7      | 2,7      | 2,7      | 14,9     | 2,7      | 9,1      | 9,0      | 8,5      | 2,7      | 2,7      | 2,7      | 2,7      | 2,7      |
| 2,7     | 2,7     | 2,7     | 2,7      | 2,7      | 2,7      | 2,7      | 2,7      | 2,7      | 2,7      | 2,7      | 14,8     | 11,7     | 26,5     | 19,8     | 9,6      |
| 14,2    | 54,6    | 13,0    | 21,3     | 48,2     | 52,1     | 15,9     | 13,2     | 41,3     | 40,1     | 36,1     | 2,7      | 2,7      | 2,7      | 2,7      | 2,7      |
| 2,7     | 2,7     | 2,7     | 2,7      | 2,7      | 2,7      | 2,7      | 2,7      | 2,7      | 2,7      | 2,7      | 2,7      | 27,9     | 21,9     | 19,0     | 2,7      |
| 14,4    | 16,5    | 14,5    | 21,9     | 29,8     | 10,5     | 12,8     | 15,3     | 11,1     | 10,9     | 10,2     | 221,0    | 32,6     | 26,1     | 25,3     | 21,6     |
| 17,8    | 31,8    | 19,7    | 31,2     | 50,2     | 16,4     | 20,6     | 20,4     | 17,3     | 18,7     | 17,5     | 312,9    | 85,5     | 62,8     | 54,6     | 24,2     |
| 2,7     | 2,7     | 2,7     | 2,7      | 2,7      | 2,7      | 6,4      | 7,5      | 2,7      | 2,7      | 2,7      | 12,0     | 12,9     | 13,8     | 11,3     | 2,7      |
| 29,1    | 49,5    | 57,9    | 33,4     | 60,9     | 26,8     | 48,8     | 19,7     | 13,5     | 34,4     | 14,2     | 2,7      | 2,7      | 2,7      | 2,7      | 12,1     |
| 10,9    | 16,9    | 12,7    | 19,2     | 32,6     | 9,8      | 10,6     | 11,8     | 11,2     | 11,2     | 10,7     | 124,5    | 34,7     | 28,6     | 24,5     | 12,4     |
| 7,7     | 14,0    | 8,8     | 11,4     | 2,7      | 6,6      | 2,7      | 7,9      | 7,3      | 7,0      | 7,0      | 13,0     | 8,8      | 20,6     | 8,0      | 2,7      |
| 2,7     | 10,1    | 9,0     | 2,7      | 2,7      | 2,7      | 7,3      | 2,7      | 2,7      | 2,7      | 2,7      | 2,7      | 2,7      | 2,7      | 2,7      | 2,7      |
| 2,7     | 2,7     | 2,7     | 2,7      | 2,7      | 2,7      | 2,7      | 2,7      | 2,7      | 2,7      | 2,7      | 13,8     | 8,7      | 2,7      | 2,7      | 2,7      |
| 2,7     | 2,7     | 2,7     | 2,7      | 2,7      | 2,7      | 2,7      | 2,7      | 2,7      | 2,7      | 2,7      | 14,0     | 12,5     | 12,0     | 10,5     | 2,7      |
| 9,8     | 12,8    | 12,2    | 15,8     | 23,5     | 17,2     | 11,8     | 13,4     | 9,1      | 8,1      | 8,0      | 2,7      | 2,7      | 12,5     | 10,6     | 9,6      |
| 8,5     | 10,6    | 8,4     | 2,7      | 13,1     | 2,7      | 2,7      | 2,7      | 14,0     | 10,5     | 8,8      | 2,7      | 2,7      | 2,7      | 2,7      | 2,7      |
| 10,6    | 2,7     | 10,6    | 14,6     | 2,7      | 2,7      | 2,7      | 11,1     | 2,7      | 2,7      | 2,7      | 8,8      | 8,2      | 2,7      | 2,7      | 8,2      |
| 9,0     | 9,8     | 9,4     | 2,7      | 2,7      | 7,8      | 2,7      | 2,7      | 2,7      | 2,7      | 2,7      | 10,3     | 8,6      | 9,2      | 8,5      | 7,3      |
| 2,7     | 2,7     | 2,7     | 12,6     | 22,6     | 2,7      | 7,5      | 8,7      | 8,3      | 8,4      | 7,8      | 2,7      | 2,7      | 2,7      | 2,7      | 2,7      |
| 2,7     | 2,7     | 2,7     | 2,7      | 13,1     | 2,7      | 2,7      | 2,7      | 2,7      | 2,7      | 2,7      | 38,0     | 27,4     | 27,7     | 19,8     | 2,7      |
| 36,9    | 39,7    | 46,9    | 69,6     | 57,4     | 29,7     | 46,5     | 49,3     | 24,3     | 30,8     | 22,8     | 2,7      | 2,7      | 2,7      | 2,7      | 24,2     |
| 2,7     | 2,7     | 2,7     | 2,7      | 2,7      | 2,7      | 2,7      | 2,7      | 2,7      | 2,7      | 2,7      | 11,5     | 9,3      | 9,9      | 9,2      | 2,7      |
| 8,7     | 9,9     | 10,1    | 13,9     | 25,2     | 7,8      | 9,3      | 10,2     | 8,5      | 8,2      | 7,9      | 2,7      | 2,7      | 2,7      | 2,7      | 7,8      |
| 2,7     | 2,7     | 8,8     | 2,7      | 2,7      | 2,7      | 2,7      | 10,7     | 2,7      | 2,7      | 2,7      | 8,8      | 9,3      | 11,0     | 2,7      | 8,3      |
| 2,7     | 2,7     | 2,7     | 2,7      | 2,7      | 15,1     | 2,7      | 2,7      | 2,7      | 22,7     | 2,7      | 16,7     | 12,8     | 14,5     | 12,3     | 10,7     |
| 12,5    | 21,0    | 16,1    | 27,3     | 41,2     | 2,7      | 14,8     | 18,4     | 16,2     | 2,7      | 14,9     | 2,7      | 2,7      | 2,7      | 2,7      | 2,7      |
| 2,7     | 9,9     | 2,7     | 2,7      | 2,7      | 2,7      | 2,7      | 2,7      | 2,7      | 2,7      | 2,7      | 19,6     | 10,9     | 10,0     | 10,0     | 2,7      |
| 13,5    | 24,7    | 14,0    | 2,7      | 12,8     | 12,8     | 23,4     | 10,7     | 2,7      | 8,4      | 2,7      | 8,2      | 2,7      | 2,7      | 2,7      | 2,7      |
| 2,7     | 10,2    | 8,9     | 11,7     | 11,8     | 7,1      | 8,1      | 8,6      | 2,7      | 8,2      | 7,3      | 2,7      | 2,7      | 2,7      | 2,7      | 2,7      |
| 17,1    | 2,7     | 18,9    | 2,7      | 2,7      | 12,8     | 2,7      | 2,7      | 2,7      | 2,7      | 2,7      | 31,6     | 16,3     | 22,3     | 23,7     | 12,8     |
| 2,7     | 45,2    | 2,7     | 29,7     | 77,2     | 15,3     | 19,7     | 33,0     | 15,1     | 17,8     | 13,7     | 2,7      | 2,7      | 2,7      | 2,7      | 2,7      |

|       |       |       |       |       |      |       |       |      |       |      |       |       |       |       |       |
|-------|-------|-------|-------|-------|------|-------|-------|------|-------|------|-------|-------|-------|-------|-------|
| 13,3  | 2,7   | 9,8   | 16,8  | 2,7   | 2,7  | 12,0  | 2,7   | 18,6 | 22,2  | 16,4 | 2,7   | 2,7   | 2,7   | 2,7   | 2,7   |
| 2,7   | 2,7   | 2,7   | 2,7   | 2,7   | 2,7  | 2,7   | 2,7   | 2,7  | 2,7   | 2,7  | 10,7  | 9,1   | 9,9   | 8,1   | 2,7   |
| 2,7   | 10,8  | 7,8   | 12,7  | 23,0  | 7,8  | 8,9   | 8,2   | 2,7  | 7,7   | 2,7  | 2,7   | 2,7   | 2,7   | 2,7   | 8,0   |
| 2,7   | 2,7   | 2,7   | 2,7   | 2,7   | 2,7  | 7,1   | 2,7   | 2,7  | 2,7   | 2,7  | 11,8  | 9,6   | 14,7  | 10,2  | 2,7   |
| 15,7  | 23,0  | 17,1  | 19,5  | 16,1  | 12,3 | 17,1  | 27,0  | 11,3 | 11,8  | 11,2 | 2,7   | 2,7   | 2,7   | 2,7   | 8,3   |
| 2,7   | 2,7   | 2,7   | 2,7   | 11,2  | 2,7  | 2,7   | 2,7   | 2,7  | 2,7   | 2,7  | 2,7   | 2,7   | 2,7   | 2,7   | 2,7   |
| 9,9   | 20,6  | 11,3  | 13,6  | 23,7  | 15,6 | 2,7   | 11,7  | 9,0  | 8,5   | 8,3  | 13,1  | 9,0   | 10,1  | 9,2   | 6,6   |
| 48,0  | 2,7   | 139,5 | 2,7   | 2,7   | 32,5 | 11,7  | 2,7   | 2,7  | 2,7   | 2,7  | 440,4 | 344,4 | 149,0 | 159,4 | 173,4 |
| 2,7   | 111,3 | 2,7   | 46,1  | 69,6  | 2,7  | 35,9  | 39,8  | 29,2 | 23,5  | 18,8 | 2,7   | 2,7   | 2,7   | 2,7   | 2,7   |
| 2,7   | 11,0  | 9,7   | 2,7   | 2,7   | 2,7  | 2,7   | 2,7   | 2,7  | 2,7   | 2,7  | 9,6   | 2,7   | 10,3  | 9,3   | 5,8   |
| 2,7   | 2,7   | 2,7   | 2,7   | 2,7   | 8,1  | 10,0  | 11,7  | 9,0  | 2,7   | 2,7  | 2,7   | 2,7   | 2,7   | 2,7   | 2,7   |
| 7,9   | 21,0  | 15,6  | 2,7   | 2,7   | 15,1 | 10,0  | 9,3   | 2,7  | 9,6   | 2,7  | 8,6   | 2,7   | 2,7   | 2,7   | 2,7   |
| 9,6   | 12,5  | 10,1  | 14,2  | 11,7  | 7,6  | 8,7   | 10,0  | 7,8  | 9,0   | 7,4  | 2,7   | 2,7   | 8,7   | 2,7   | 2,7   |
| 2,7   | 10,3  | 8,6   | 10,7  | 12,6  | 9,2  | 8,6   | 8,0   | 8,8  | 8,7   | 8,2  | 2,7   | 2,7   | 2,7   | 2,7   | 2,7   |
| 10,4  | 2,7   | 10,2  | 14,4  | 2,7   | 2,7  | 9,4   | 10,6  | 2,7  | 7,2   | 2,7  | 2,7   | 2,7   | 2,7   | 2,7   | 2,7   |
| 8,6   | 8,2   | 8,1   | 11,8  | 2,7   | 7,0  | 2,7   | 2,7   | 2,7  | 2,7   | 2,7  | 2,7   | 2,7   | 2,7   | 2,7   | 2,7   |
| 2,7   | 2,7   | 2,7   | 2,7   | 2,7   | 2,7  | 7,8   | 15,9  | 2,7  | 7,8   | 2,7  | 15,0  | 10,9  | 12,3  | 14,0  | 13,3  |
| 110,2 | 119,4 | 112,5 | 165,9 | 194,1 | 87,9 | 112,6 | 111,7 | 91,9 | 138,5 | 87,6 | 2,7   | 2,7   | 9,0   | 8,7   | 2,7   |
| 2,7   | 8,9   | 8,8   | 2,7   | 2,7   | 2,7  | 2,7   | 10,4  | 2,7  | 2,7   | 2,7  | 2,7   | 2,7   | 8,0   | 2,7   | 2,7   |
| 2,7   | 2,7   | 2,7   | 2,7   | 2,7   | 2,7  | 2,7   | 2,7   | 2,7  | 2,7   | 2,7  | 25,3  | 16,1  | 34,7  | 25,2  | 2,7   |
| 64,2  | 112,0 | 71,8  | 96,1  | 171,2 | 91,9 | 74,3  | 108,4 | 87,1 | 129,5 | 83,7 | 2,7   | 2,7   | 2,7   | 2,7   | 14,5  |
| 2,7   | 2,7   | 2,7   | 2,7   | 2,7   | 2,7  | 2,7   | 2,7   | 2,7  | 2,7   | 2,7  | 9,1   | 8,3   | 9,9   | 10,4  | 7,5   |
| 22,9  | 34,2  | 26,9  | 31,9  | 59,0  | 20,5 | 21,1  | 23,2  | 24,7 | 34,3  | 28,6 | 2,7   | 2,7   | 2,7   | 2,7   | 2,7   |
| 17,1  | 26,4  | 17,2  | 2,7   | 2,7   | 16,9 | 2,7   | 2,7   | 2,7  | 2,7   | 2,7  | 8,9   | 8,4   | 9,7   | 10,2  | 7,1   |
| 9,1   | 2,7   | 8,8   | 37,9  | 2,7   | 2,7  | 16,1  | 27,6  | 24,2 | 2,7   | 2,7  | 2,7   | 2,7   | 2,7   | 2,7   | 2,7   |
| 2,7   | 2,7   | 2,7   | 2,7   | 2,7   | 2,7  | 7,9   | 2,7   | 2,7  | 2,7   | 2,7  | 11,2  | 10,5  | 8,5   | 9,8   | 2,7   |
| 2,7   | 2,7   | 9,3   | 2,7   | 2,7   | 2,7  | 2,7   | 2,7   | 2,7  | 2,7   | 2,7  | 2,7   | 2,7   | 2,7   | 2,7   | 7,2   |
| 2,7   | 2,7   | 10,0  | 2,7   | 2,7   | 7,7  | 2,7   | 2,7   | 2,7  | 2,7   | 2,7  | 10,6  | 10,2  | 2,7   | 9,6   | 7,1   |
| 9,9   | 9,4   | 2,7   | 11,5  | 14,0  | 2,7  | 8,3   | 9,2   | 8,3  | 8,9   | 8,1  | 2,7   | 2,7   | 2,7   | 2,7   | 2,7   |
| 2,7   | 10,2  | 9,9   | 2,7   | 2,7   | 2,7  | 2,7   | 2,7   | 2,7  | 2,7   | 2,7  | 2,7   | 2,7   | 2,7   | 2,7   | 2,7   |
| 2,7   | 2,7   | 2,7   | 2,7   | 2,7   | 2,7  | 9,8   | 12,3  | 2,7  | 11,2  | 2,7  | 2,7   | 2,7   | 2,7   | 9,1   | 8,9   |
| 2,7   | 2,7   | 2,7   | 2,7   | 2,7   | 2,7  | 2,7   | 2,7   | 2,7  | 2,7   | 2,7  | 10,3  | 2,7   | 14,9  | 12,7  | 2,7   |
| 9,6   | 17,0  | 16,0  | 16,4  | 14,1  | 2,7  | 22,6  | 23,7  | 11,7 | 13,4  | 8,2  | 2,7   | 2,7   | 2,7   | 2,7   | 2,7   |
| 32,3  | 29,9  | 36,1  | 2,7   | 2,7   | 27,9 | 2,7   | 2,7   | 2,7  | 36,0  | 2,7  | 13,2  | 12,0  | 14,2  | 11,6  | 9,6   |
| 2,7   | 2,7   | 2,7   | 49,6  | 68,8  | 2,7  | 39,5  | 55,2  | 26,9 | 2,7   | 23,6 | 2,7   | 2,7   | 8,7   | 2,7   | 2,7   |
| 2,7   | 10,2  | 10,6  | 2,7   | 2,7   | 2,7  | 2,7   | 2,7   | 2,7  | 2,7   | 2,7  | 2,7   | 2,7   | 17,4  | 15,0  | 2,7   |
| 9,6   | 8,8   | 12,9  | 2,7   | 2,7   | 17,1 | 2,7   | 19,7  | 12,4 | 12,7  | 8,3  | 2,7   | 2,7   | 2,7   | 2,7   | 2,7   |
| 2,7   | 2,7   | 2,7   | 2,7   | 2,7   | 2,7  | 2,7   | 2,7   | 2,7  | 2,7   | 2,7  | 11,7  | 9,6   | 16,0  | 13,2  | 2,7   |
| 22,5  | 33,1  | 28,4  | 32,2  | 67,3  | 23,2 | 2,7   | 31,3  | 26,5 | 41,0  | 24,7 | 2,7   | 2,7   | 2,7   | 2,7   | 7,7   |
| 2,7   | 2,7   | 2,7   | 2,7   | 2,7   | 2,7  | 2,7   | 2,7   | 2,7  | 2,7   | 2,7  | 18,6  | 13,3  | 25,5  | 19,1  | 2,7   |
| 11,3  | 17,9  | 16,2  | 2,7   | 2,7   | 12,2 | 2,7   | 2,7   | 2,7  | 2,7   | 2,7  | 2,7   | 2,7   | 2,7   | 2,7   | 10,4  |
| 11,7  | 12,0  | 11,9  | 36,5  | 55,0  | 9,1  | 19,6  | 56,3  | 23,7 | 29,9  | 25,0 | 8,3   | 2,7   | 2,7   | 2,7   | 2,7   |
| 10,1  | 11,7  | 14,0  | 12,7  | 2,7   | 13,6 | 25,5  | 13,6  | 2,7  | 9,1   | 2,7  | 2,7   | 2,7   | 2,7   | 2,7   | 2,7   |
| 2,7   | 10,5  | 10,8  | 2,7   | 2,7   | 7,9  | 2,7   | 2,7   | 2,7  | 2,7   | 2,7  | 2,7   | 2,7   | 2,7   | 2,7   | 2,7   |
| 9,8   | 2,7   | 2,7   | 12,7  | 16,6  | 2,7  | 8,7   | 10,8  | 8,3  | 10,1  | 9,2  | 2,7   | 2,7   | 2,7   | 2,7   | 2,7   |
| 9,2   | 15,0  | 12,3  | 11,8  | 14,9  | 8,7  | 9,1   | 9,9   | 9,8  | 10,4  | 8,9  | 2,7   | 2,7   | 2,7   | 2,7   | 2,7   |
| 2,7   | 2,7   | 2,7   | 2,7   | 2,7   | 2,7  | 2,7   | 2,7   | 2,7  | 2,7   | 2,7  | 46,4  | 38,1  | 42,0  | 32,3  | 51,6  |
| 76,9  | 2,7   | 84,1  | 74,7  | 2,7   | 43,7 | 2,7   | 65,2  | 2,7  | 58,3  | 2,7  | 2,7   | 2,7   | 2,7   | 2,7   | 2,7   |
| 2,7   | 44,5  | 2,7   | 2,7   | 40,4  | 2,7  | 57,8  | 2,7   | 49,7 | 2,7   | 28,6 | 2,7   | 2,7   | 2,7   | 2,7   | 2,7   |
| 2,7   | 2,7   | 2,7   | 2,7   | 2,7   | 12,4 | 2,7   | 2,7   | 2,7  | 2,7   | 2,7  | 2,7   | 2,7   | 2,7   | 2,7   | 6,3   |
| 8,6   | 11,6  | 18,3  | 2,7   | 2,7   | 11,1 | 2,7   | 2,7   | 2,7  | 6,9   | 2,7  | 7,4   | 2,7   | 2,7   | 2,7   | 2,7   |
| 13,2  | 2,7   | 2,7   | 15,3  | 18,0  | 2,7  | 9,0   | 10,8  | 9,2  | 7,5   | 15,0 | 2,7   | 2,7   | 9,9   | 2,7   | 2,7   |
| 13,5  | 12,3  | 13,0  | 2,7   | 2,7   | 11,5 | 2,7   | 2,7   | 2,7  | 2,7   | 2,7  | 2,7   | 2,7   | 2,7   | 2,7   | 2,7   |
| 2,7   | 2,7   | 2,7   | 17,8  | 19,7  | 2,7  | 11,3  | 17,5  | 12,4 | 14,5  | 9,2  | 2,7   | 2,7   | 2,7   | 2,7   | 2,7   |
| 10,5  | 10,2  | 10,2  | 11,3  | 12,4  | 8,5  | 8,6   | 8,9   | 2,7  | 8,3   | 7,3  | 2,7   | 2,7   | 2,7   | 2,7   | 2,7   |
| 2,7   | 2,7   | 2,7   | 2,7   | 2,7   | 6,7  | 2,7   | 15,9  | 8,0  | 2,7   | 2,7  | 2,7   | 2,7   | 2,7   | 2,7   | 2,7   |
| 11,1  | 10,7  | 10,2  | 12,2  | 16,2  | 9,2  | 8,6   | 10,8  | 9,6  | 11,5  | 8,9  | 2,7   | 2,7   | 2,7   | 2,7   | 2,7   |
| 2,7   | 13,8  | 9,5   | 2,7   | 20,2  | 8,7  | 2,7   | 12,5  | 2,7  | 2,7   | 2,7  | 2,7   | 2,7   | 2,7   | 2,7   | 2,7   |
| 2,7   | 8,6   | 8,1   | 2,7   | 2,7   | 8,7  | 2,7   | 2,7   | 8,2  | 7,2   | 2,7  | 2,7   | 2,7   | 2,7   | 2,7   | 2,7   |

|      |      |      |      |      |      |      |      |      |      |      |      |      |      |      |      |
|------|------|------|------|------|------|------|------|------|------|------|------|------|------|------|------|
| 11,1 | 21,4 | 15,8 | 13,4 | 13,0 | 11,0 | 2,7  | 11,3 | 9,0  | 12,5 | 2,7  | 2,7  | 2,7  | 2,7  | 2,7  | 2,7  |
| 2,7  | 2,7  | 2,7  | 2,7  | 2,7  | 2,7  | 2,7  | 7,8  | 2,7  | 2,7  | 2,7  | 9,3  | 8,6  | 8,4  | 2,7  | 2,7  |
| 2,7  | 2,7  | 2,7  | 10,0 | 2,7  | 7,6  | 6,3  | 8,7  | 7,4  | 8,3  | 2,7  | 2,7  | 2,7  | 2,7  | 2,7  | 2,7  |
| 2,7  | 2,7  | 2,7  | 2,7  | 10,7 | 16,2 | 8,0  | 16,7 | 8,6  | 9,7  | 2,7  | 9,9  | 2,7  | 12,7 | 12,7 | 2,7  |
| 12,9 | 15,0 | 12,0 | 12,8 | 13,3 | 2,7  | 14,9 | 13,3 | 12,6 | 12,6 | 10,9 | 2,7  | 2,7  | 2,7  | 2,7  | 2,7  |
| 2,7  | 2,7  | 2,7  | 2,7  | 2,7  | 2,7  | 2,7  | 2,7  | 2,7  | 2,7  | 2,7  | 9,3  | 9,4  | 10,4 | 10,1 | 2,7  |
| 8,0  | 8,5  | 2,7  | 10,6 | 2,7  | 7,4  | 2,7  | 2,7  | 2,7  | 2,7  | 2,7  | 2,7  | 2,7  | 2,7  | 2,7  | 2,7  |
| 2,7  | 2,7  | 2,7  | 2,7  | 10,2 | 2,7  | 7,1  | 12,3 | 9,2  | 8,3  | 7,1  | 2,7  | 2,7  | 2,7  | 2,7  | 2,7  |
| 2,7  | 2,7  | 2,7  | 2,7  | 2,7  | 2,7  | 2,7  | 2,7  | 2,7  | 2,7  | 2,7  | 9,8  | 12,9 | 13,4 | 13,2 | 7,7  |
| 9,9  | 13,3 | 11,3 | 20,2 | 17,1 | 13,3 | 2,7  | 13,3 | 15,5 | 12,3 | 10,1 | 2,7  | 2,7  | 2,7  | 2,7  | 2,7  |
| 2,7  | 2,7  | 2,7  | 2,7  | 2,7  | 2,7  | 2,7  | 2,7  | 2,7  | 2,7  | 2,7  | 10,3 | 13,8 | 12,6 | 12,0 | 8,2  |
| 16,8 | 36,2 | 25,4 | 35,7 | 32,5 | 19,8 | 2,7  | 16,4 | 15,0 | 27,9 | 9,2  | 2,7  | 2,7  | 2,7  | 2,7  | 2,7  |
| 2,7  | 2,7  | 2,7  | 2,7  | 2,7  | 2,7  | 2,7  | 2,7  | 2,7  | 2,7  | 2,7  | 13,4 | 24,0 | 27,8 | 26,7 | 8,9  |
| 14,0 | 20,7 | 13,3 | 23,7 | 17,5 | 22,5 | 2,7  | 15,2 | 25,5 | 18,3 | 14,9 | 2,7  | 2,7  | 2,7  | 2,7  | 2,7  |
| 2,7  | 2,7  | 2,7  | 2,7  | 2,7  | 2,7  | 2,7  | 2,7  | 2,7  | 2,7  | 2,7  | 17,3 | 18,0 | 20,0 | 18,8 | 2,7  |
| 2,7  | 17,1 | 2,7  | 10,6 | 2,7  | 18,3 | 2,7  | 8,2  | 9,1  | 6,8  | 2,7  | 2,7  | 2,7  | 2,7  | 2,7  | 2,7  |
| 2,7  | 2,7  | 2,7  | 14,0 | 2,7  | 2,7  | 7,0  | 9,2  | 13,1 | 14,7 | 7,2  | 2,7  | 9,0  | 10,7 | 11,6 | 2,7  |
| 2,7  | 10,8 | 9,4  | 2,7  | 2,7  | 12,2 | 13,2 | 2,7  | 2,7  | 2,7  | 2,7  | 2,7  | 2,7  | 9,7  | 9,6  | 2,7  |
| 8,4  | 9,4  | 8,9  | 12,7 | 2,7  | 2,7  | 7,2  | 2,7  | 10,8 | 7,3  | 7,5  | 2,7  | 2,7  | 2,7  | 2,7  | 2,7  |
| 2,7  | 2,7  | 11,4 | 2,7  | 2,7  | 18,4 | 2,7  | 2,7  | 2,7  | 2,7  | 2,7  | 2,7  | 2,7  | 2,7  | 2,7  | 6,8  |
| 8,5  | 12,8 | 2,7  | 14,6 | 11,1 | 2,7  | 9,8  | 8,3  | 14,3 | 15,1 | 9,9  | 2,7  | 10,0 | 9,1  | 9,2  | 2,7  |
| 2,7  | 2,7  | 2,7  | 2,7  | 2,7  | 2,7  | 2,7  | 2,7  | 2,7  | 2,7  | 2,7  | 10,1 | 10,6 | 10,4 | 10,4 | 2,7  |
| 9,5  | 11,2 | 9,6  | 12,5 | 11,2 | 9,7  | 2,7  | 9,8  | 11,6 | 8,0  | 8,3  | 14,0 | 21,7 | 19,9 | 17,5 | 2,7  |
| 14,0 | 22,6 | 20,6 | 19,0 | 14,0 | 24,9 | 7,1  | 11,2 | 17,8 | 15,2 | 15,8 | 2,7  | 2,7  | 2,7  | 2,7  | 2,7  |
| 2,7  | 2,7  | 2,7  | 2,7  | 2,7  | 2,7  | 2,7  | 2,7  | 2,7  | 2,7  | 2,7  | 30,3 | 33,3 | 27,8 | 26,0 | 2,7  |
| 2,7  | 2,7  | 2,7  | 2,7  | 2,7  | 2,7  | 2,7  | 2,7  | 2,7  | 2,7  | 2,7  | 2,7  | 2,7  | 2,7  | 2,7  | 11,9 |
| 19,6 | 45,9 | 33,0 | 52,0 | 55,6 | 34,4 | 2,7  | 31,2 | 44,4 | 34,0 | 29,5 | 2,7  | 2,7  | 2,7  | 2,7  | 2,7  |
| 2,7  | 2,7  | 2,7  | 16,6 | 15,4 | 2,7  | 2,7  | 8,6  | 9,3  | 2,7  | 8,0  | 2,7  | 2,7  | 2,7  | 2,7  | 2,7  |
| 8,9  | 13,1 | 10,1 | 2,7  | 2,7  | 9,8  | 2,7  | 2,7  | 2,7  | 2,7  | 2,7  | 2,7  | 2,7  | 2,7  | 2,7  | 7,4  |
| 2,7  | 2,7  | 2,7  | 12,1 | 11,3 | 2,7  | 6,5  | 7,8  | 10,9 | 8,5  | 8,1  | 2,7  | 2,7  | 2,7  | 2,7  | 2,7  |
| 2,7  | 9,2  | 2,7  | 2,7  | 2,7  | 7,7  | 2,7  | 2,7  | 2,7  | 2,7  | 2,7  | 2,7  | 2,7  | 2,7  | 2,7  | 2,7  |
| 7,0  | 11,6 | 11,3 | 2,7  | 2,7  | 2,7  | 2,7  | 2,7  | 2,7  | 2,7  | 2,7  | 2,7  | 9,8  | 12,0 | 10,2 | 2,7  |
| 2,7  | 11,1 | 2,7  | 9,8  | 2,7  | 12,0 | 2,7  | 2,7  | 11,1 | 2,7  | 2,7  | 2,7  | 2,7  | 2,7  | 2,7  | 2,7  |
| 2,7  | 2,7  | 2,7  | 2,7  | 2,7  | 2,7  | 2,7  | 2,7  | 2,7  | 2,7  | 2,7  | 9,7  | 9,6  | 36,9 | 34,0 | 2,7  |
| 10,1 | 11,1 | 9,5  | 15,1 | 12,1 | 8,9  | 2,7  | 2,7  | 10,9 | 8,6  | 8,7  | 2,7  | 2,7  | 2,7  | 2,7  | 42,5 |
| 2,7  | 2,7  | 9,5  | 2,7  | 13,1 | 2,7  | 2,7  | 2,7  | 7,2  | 2,7  | 2,7  | 2,7  | 2,7  | 2,7  | 2,7  | 2,7  |
| 11,6 | 10,3 | 8,0  | 13,8 | 2,7  | 7,7  | 7,4  | 19,0 | 10,2 | 15,6 | 9,0  | 2,7  | 2,7  | 2,7  | 2,7  | 2,7  |
| 7,2  | 2,7  | 2,7  | 2,7  | 9,6  | 2,7  | 2,7  | 2,7  | 6,8  | 6,9  | 6,6  | 2,7  | 2,7  | 2,7  | 2,7  | 2,7  |
| 9,4  | 2,7  | 2,7  | 20,8 | 9,0  | 7,2  | 2,7  | 2,7  | 8,5  | 2,7  | 7,1  | 2,7  | 2,7  | 2,7  | 2,7  | 2,7  |
| 10,2 | 2,7  | 11,3 | 2,7  | 2,7  | 2,7  | 17,7 | 16,4 | 7,3  | 22,0 | 6,8  | 2,7  | 2,7  | 2,7  | 2,7  | 2,7  |
| 13,0 | 17,9 | 2,7  | 2,7  | 24,7 | 12,9 | 2,7  | 2,7  | 2,7  | 2,7  | 2,7  | 2,7  | 2,7  | 2,7  | 2,7  | 2,7  |
| 8,2  | 2,7  | 2,7  | 22,9 | 19,3 | 2,7  | 2,7  | 4,3  | 8,2  | 15,1 | 11,0 | 2,7  | 2,7  | 2,7  | 2,7  | 2,7  |
| 1    | 2    | 2    | 2    | 2    | 1    | 1    | 2    | 2    | 1    | 1    | 2    | 2    | 1    | 1    | 1    |

| 171<br>A | 171<br>B | 172<br>A | 172<br>B | 176<br>A | 176<br>B | 181<br>A | 181<br>B | 214<br>A | 234<br>A | 234<br>B | 235<br>A | 235<br>B | 237<br>A | 237<br>B | 280<br>A |
|----------|----------|----------|----------|----------|----------|----------|----------|----------|----------|----------|----------|----------|----------|----------|----------|
| 9,9      | 2,7      | 2,7      | 2,7      | 5,9      | 2,7      | 2,7      | 2,7      | 2,7      | 18,1     | 2,7      | 2,7      | 2,7      | 8,4      | 7,7      | 2,7      |
| 11,7     | 9,4      | 17,2     | 15,2     | 2,7      | 9,0      | 14,3     | 13,7     | 10,7     | 2,7      | 2,7      | 2,7      | 2,7      | 2,7      | 2,7      | 2,7      |
| 8,1      | 2,7      | 2,7      | 2,7      | 8,7      | 2,7      | 2,7      | 2,7      | 2,7      | 10,0     | 2,7      | 2,7      | 2,7      | 2,7      | 2,7      | 2,7      |
| 11,9     | 2,7      | 12,8     | 2,7      | 8,6      | 2,7      | 2,7      | 2,7      | 2,7      | 15,7     | 2,7      | 2,7      | 2,7      | 2,7      | 8,4      | 2,7      |
| 21,4     | 11,6     | 18,3     | 15,0     | 12,0     | 12,4     | 14,7     | 14,8     | 11,2     | 15,2     | 2,7      | 12,1     | 11,5     | 11,8     | 10,2     | 10,2     |
| 9,3      | 8,0      | 13,7     | 11,3     | 7,8      | 8,0      | 10,5     | 11,0     | 8,9      | 2,7      | 2,7      | 2,7      | 2,7      | 2,7      | 2,7      | 2,7      |
| 2,7      | 2,7      | 14,2     | 2,7      | 2,7      | 2,7      | 2,7      | 49,3     | 2,7      | 2,7      | 2,7      | 2,7      | 2,7      | 2,7      | 2,7      | 2,7      |
| 25,0     | 2,7      | 21,1     | 27,4     | 2,7      | 2,7      | 10,5     | 15,8     | 31,3     | 2,7      | 2,7      | 2,7      | 2,7      | 2,7      | 2,7      | 2,7      |
| 2,7      | 2,7      | 2,7      | 2,7      | 2,7      | 2,7      | 2,7      | 2,7      | 2,7      | 2,7      | 2,7      | 2,7      | 2,7      | 2,7      | 9,4      | 2,7      |
| 9,4      | 9,3      | 11,7     | 11,4     | 8,5      | 8,1      | 11,3     | 10,9     | 2,7      | 10,7     | 2,7      | 2,7      | 2,7      | 10,1     | 2,7      | 9,4      |
| 85,1     | 2,7      | 62,0     | 2,7      | 2,7      | 2,7      | 2,7      | 54,1     | 57,0     | 2,7      | 2,7      | 2,7      | 2,7      | 2,7      | 2,7      | 2,7      |
| 2,7      | 16,1     | 2,7      | 23,2     | 22,8     | 16,8     | 26,9     | 2,7      | 2,7      | 19,4     | 12,0     | 13,5     | 13,2     | 12,8     | 14,4     | 12,6     |
| 2,7      | 2,7      | 2,7      | 2,7      | 2,7      | 2,7      | 2,7      | 2,7      | 2,7      | 2,7      | 2,7      | 2,7      | 2,7      | 2,7      | 2,7      | 2,7      |
| 11,5     | 8,4      | 12,3     | 11,6     | 8,2      | 8,0      | 15,4     | 17,9     | 11,8     | 2,7      | 2,7      | 2,7      | 2,7      | 2,7      | 2,7      | 2,7      |
| 19,2     | 10,8     | 17,6     | 15,2     | 12,1     | 10,3     | 23,5     | 28,1     | 17,5     | 18,5     | 9,8      | 2,7      | 2,7      | 10,4     | 13,6     | 17,9     |
| 8,6      | 2,7      | 2,7      | 2,7      | 2,7      | 2,7      | 2,7      | 2,7      | 8,9      | 2,7      | 2,7      | 2,7      | 2,7      | 2,7      | 2,7      | 2,7      |
| 34,8     | 13,4     | 8,3      | 2,7      | 6,7      | 2,7      | 12,5     | 9,9      | 8,4      | 2,7      | 2,7      | 2,7      | 2,7      | 2,7      | 2,7      | 2,7      |
| 27,7     | 18,9     | 37,7     | 28,4     | 23,3     | 21,7     | 26,1     | 26,9     | 24,9     | 15,9     | 13,9     | 15,8     | 15,5     | 13,6     | 17,1     | 13,2     |
| 2,7      | 2,7      | 2,7      | 2,7      | 2,7      | 2,7      | 2,7      | 2,7      | 2,7      | 10,1     | 8,8      | 14,8     | 2,7      | 2,7      | 10,4     | 2,7      |
| 2,7      | 2,7      | 2,7      | 2,7      | 2,7      | 2,7      | 2,7      | 2,7      | 2,7      | 13,6     | 2,7      | 2,7      | 2,7      | 2,7      | 2,7      | 2,7      |
| 9,7      | 2,7      | 2,7      | 2,7      | 2,7      | 2,7      | 2,7      | 2,7      | 2,7      | 2,7      | 2,7      | 2,7      | 2,7      | 2,7      | 2,7      | 2,7      |
| 2,7      | 10,5     | 17,8     | 14,1     | 13,6     | 11,4     | 18,5     | 17,3     | 2,7      | 19,5     | 11,4     | 15,4     | 17,6     | 10,2     | 14,3     | 10,5     |
| 211,3    | 12,1     | 113,3    | 19,2     | 34,4     | 16,3     | 25,3     | 105,2    | 121,2    | 9,8      | 2,7      | 11,2     | 12,0     | 10,1     | 11,1     | 10,8     |
| 2,7      | 2,7      | 2,7      | 2,7      | 2,7      | 2,7      | 2,7      | 2,7      | 2,7      | 2,7      | 2,7      | 2,7      | 2,7      | 2,7      | 2,7      | 2,7      |
| 10,7     | 27,6     | 29,7     | 35,2     | 8,9      | 23,1     | 35,4     | 34,5     | 22,3     | 11,8     | 18,3     | 19,6     | 21,8     | 7,9      | 10,7     | 18,4     |
| 2,7      | 2,7      | 2,7      | 2,7      | 2,7      | 2,7      | 2,7      | 2,7      | 2,7      | 2,7      | 2,7      | 2,7      | 2,7      | 2,7      | 2,7      | 2,7      |
| 27,9     | 2,7      | 22,9     | 2,7      | 10,8     | 2,7      | 2,7      | 20,3     | 20,5     | 2,7      | 8,6      | 2,7      | 2,7      | 2,7      | 2,7      | 2,7      |
| 40,6     | 9,1      | 27,0     | 23,9     | 9,7      | 9,8      | 23,5     | 23,8     | 26,7     | 34,6     | 2,7      | 2,7      | 2,7      | 10,3     | 16,1     | 9,9      |
| 95,0     | 14,2     | 64,7     | 23,6     | 22,3     | 16,6     | 24,5     | 57,9     | 62,5     | 11,9     | 10,6     | 12,0     | 12,6     | 11,3     | 12,8     | 10,2     |
| 32,9     | 2,7      | 14,7     | 2,7      | 9,2      | 2,7      | 2,7      | 11,1     | 11,0     | 2,7      | 2,7      | 2,7      | 2,7      | 2,7      | 2,7      | 2,7      |
| 2,7      | 9,6      | 2,7      | 16,1     | 2,7      | 12,7     | 11,5     | 2,7      | 2,7      | 53,5     | 9,5      | 11,3     | 10,7     | 17,4     | 18,3     | 18,2     |
| 42,3     | 9,1      | 29,1     | 14,4     | 12,2     | 10,1     | 15,1     | 27,3     | 26,8     | 10,6     | 8,8      | 10,6     | 10,6     | 8,2      | 9,0      | 8,8      |
| 9,6      | 2,7      | 9,4      | 2,7      | 6,3      | 2,7      | 9,5      | 9,9      | 7,9      | 9,9      | 8,3      | 9,8      | 9,9      | 7,2      | 7,6      | 7,9      |
| 2,7      | 2,7      | 2,7      | 2,7      | 2,7      | 2,7      | 9,7      | 9,5      | 2,7      | 2,7      | 2,7      | 2,7      | 2,7      | 2,7      | 2,7      | 2,7      |
| 8,8      | 2,7      | 2,7      | 2,7      | 2,7      | 2,7      | 2,7      | 2,7      | 2,7      | 2,7      | 2,7      | 2,7      | 2,7      | 2,7      | 2,7      | 2,7      |
| 12,2     | 2,7      | 18,5     | 2,7      | 11,5     | 2,7      | 2,7      | 11,2     | 12,1     | 2,7      | 2,7      | 2,7      | 2,7      | 2,7      | 2,7      | 2,7      |
| 2,7      | 17,6     | 2,7      | 25,1     | 2,7      | 11,9     | 15,4     | 10,0     | 2,7      | 9,2      | 20,1     | 15,1     | 16,8     | 10,1     | 11,1     | 18,4     |
| 9,3      | 2,7      | 2,7      | 2,7      | 7,6      | 2,7      | 2,7      | 2,7      | 2,7      | 2,7      | 2,7      | 2,7      | 2,7      | 2,7      | 2,7      | 2,7      |
| 7,9      | 2,7      | 2,7      | 2,7      | 7,5      | 2,7      | 2,7      | 2,7      | 2,7      | 2,7      | 2,7      | 2,7      | 2,7      | 8,8      | 2,7      | 2,7      |
| 8,6      | 2,7      | 10,4     | 2,7      | 7,3      | 7,1      | 9,5      | 9,9      | 8,1      | 9,3      | 2,7      | 2,7      | 2,7      | 2,7      | 2,7      | 2,7      |
| 2,7      | 2,7      | 2,7      | 2,7      | 2,7      | 2,7      | 2,7      | 2,7      | 2,7      | 2,7      | 2,7      | 2,7      | 2,7      | 2,7      | 2,7      | 2,7      |
| 67,5     | 2,7      | 28,7     | 2,7      | 25,2     | 2,7      | 2,7      | 27,9     | 20,6     | 185,2    | 2,7      | 2,7      | 2,7      | 2,7      | 58,3     | 2,7      |
| 2,7      | 22,0     | 2,7      | 25,2     | 2,7      | 21,1     | 27,9     | 2,7      | 2,7      | 2,7      | 14,2     | 15,7     | 22,2     | 22,2     | 2,7      | 18,3     |
| 10,3     | 2,7      | 11,6     | 2,7      | 8,2      | 2,7      | 2,7      | 10,4     | 8,5      | 2,7      | 2,7      | 2,7      | 2,7      | 2,7      | 2,7      | 2,7      |
| 2,7      | 7,6      | 2,7      | 10,6     | 2,7      | 7,4      | 10,2     | 2,7      | 2,7      | 2,7      | 2,7      | 2,7      | 2,7      | 2,7      | 8,5      | 2,7      |
| 11,2     | 2,7      | 12,9     | 11,9     | 2,7      | 2,7      | 2,7      | 2,7      | 8,5      | 2,7      | 2,7      | 2,7      | 2,7      | 2,7      | 2,7      | 2,7      |
| 11,6     | 18,2     | 15,9     | 2,7      | 11,3     | 2,7      | 15,2     | 15,6     | 12,2     | 14,8     | 2,7      | 2,7      | 2,7      | 2,7      | 12,8     | 17,1     |
| 10,5     | 2,7      | 2,7      | 13,6     | 2,7      | 10,5     | 2,7      | 2,7      | 2,7      | 18,1     | 12,7     | 17,0     | 18,7     | 17,3     | 9,7      | 2,7      |
| 2,7      | 8,2      | 16,6     | 13,1     | 7,6      | 7,6      | 10,5     | 2,7      | 8,4      | 2,7      | 2,7      | 2,7      | 2,7      | 2,7      | 2,7      | 8,8      |
| 9,5      | 2,7      | 2,7      | 2,7      | 2,7      | 2,7      | 2,7      | 2,7      | 2,7      | 2,7      | 2,7      | 2,7      | 2,7      | 2,7      | 2,7      | 2,7      |
| 2,7      | 2,7      | 2,7      | 2,7      | 2,7      | 2,7      | 2,7      | 2,7      | 2,7      | 8,8      | 2,7      | 2,7      | 2,7      | 7,5      | 2,7      | 2,7      |
| 26,1     | 2,7      | 29,5     | 12,2     | 19,6     | 8,6      | 2,7      | 28,0     | 24,3     | 16,5     | 2,7      | 2,7      | 2,7      | 2,7      | 9,3      | 2,7      |
| 2,7      | 13,4     | 2,7      | 12,4     | 2,7      | 8,4      | 18,8     | 2,7      | 2,7      | 36,7     | 12,8     | 15,2     | 15,1     | 12,6     | 16,4     | 34,3     |





|      |      |      |      |      |      |      |      |      |       |      |      |      |      |      |      |
|------|------|------|------|------|------|------|------|------|-------|------|------|------|------|------|------|
| 2,7  | 2,7  | 2,7  | 2,7  | 2,7  | 7,8  | 2,7  | 2,7  | 2,7  | 13,3  | 2,7  | 2,7  | 2,7  | 2,7  | 2,7  | 2,7  |
| 2,7  | 7,0  | 2,7  | 2,7  | 2,7  | 2,7  | 10,2 | 10,0 | 2,7  | 195,4 | 2,7  | 2,7  | 2,7  | 2,7  | 84,1 | 10,8 |
| 2,7  | 2,7  | 2,7  | 2,7  | 2,7  | 2,7  | 2,7  | 2,7  | 2,7  | 199,2 | 2,7  | 2,7  | 2,7  | 2,7  | 2,7  | 2,7  |
| 6,8  | 7,5  | 12,2 | 2,7  | 7,1  | 8,0  | 12,7 | 19,5 | 9,5  | 28,6  | 9,6  | 2,7  | 14,1 | 9,6  | 12,2 | 2,7  |
| 2,7  | 7,5  | 2,7  | 2,7  | 2,7  | 2,7  | 9,6  | 2,7  | 2,7  | 22,5  | 2,7  | 2,7  | 2,7  | 2,7  | 19,3 | 2,7  |
| 2,7  | 2,7  | 10,8 | 10,2 | 6,8  | 2,7  | 12,5 | 13,1 | 9,0  | 2,7   | 2,7  | 10,9 | 18,5 | 2,7  | 11,8 | 8,7  |
| 2,7  | 2,7  | 2,7  | 2,7  | 2,7  | 7,3  | 2,7  | 2,7  | 2,7  | 18,7  | 2,7  | 2,7  | 2,7  | 8,2  | 2,7  | 2,7  |
| 2,7  | 2,7  | 2,7  | 2,7  | 2,7  | 2,7  | 2,7  | 2,7  | 2,7  | 51,3  | 2,7  | 2,7  | 2,7  | 2,7  | 22,7 | 2,7  |
| 8,2  | 8,5  | 12,9 | 12,1 | 8,7  | 2,7  | 18,9 | 14,9 | 11,9 | 57,4  | 2,7  | 2,7  | 2,7  | 2,7  | 18,6 | 2,7  |
| 2,7  | 2,7  | 2,7  | 2,7  | 2,7  | 9,4  | 2,7  | 2,7  | 2,7  | 23,3  | 12,5 | 14,6 | 27,1 | 14,0 | 10,2 | 16,3 |
| 47,9 | 11,3 | 13,4 | 17,0 | 9,7  | 2,7  | 13,2 | 10,9 | 10,9 | 2,7   | 2,7  | 2,7  | 2,7  | 2,7  | 2,7  | 12,4 |
| 2,7  | 2,7  | 2,7  | 2,7  | 2,7  | 11,1 | 2,7  | 2,7  | 2,7  | 40,0  | 12,1 | 11,5 | 12,6 | 10,7 | 18,9 | 2,7  |
| 10,9 | 12,7 | 23,5 | 18,2 | 9,9  | 2,7  | 27,2 | 29,9 | 17,9 | 29,2  | 14,0 | 18,3 | 26,2 | 2,7  | 13,7 | 16,9 |
| 2,7  | 2,7  | 2,7  | 2,7  | 2,7  | 12,7 | 2,7  | 2,7  | 2,7  | 2,7   | 2,7  | 2,7  | 2,7  | 13,7 | 2,7  | 2,7  |
| 2,7  | 2,7  | 23,3 | 2,7  | 7,7  | 2,7  | 11,5 | 24,9 | 11,6 | 14,6  | 2,7  | 2,7  | 10,5 | 2,7  | 2,7  | 8,0  |
| 2,7  | 2,7  | 2,7  | 10,1 | 2,7  | 7,3  | 15,1 | 2,7  | 2,7  | 15,4  | 2,7  | 10,9 | 16,4 | 7,4  | 8,6  | 9,1  |
| 2,7  | 2,7  | 11,7 | 2,7  | 2,7  | 2,7  | 2,7  | 2,7  | 15,9 | 2,7   | 2,7  | 2,7  | 2,7  | 2,7  | 2,7  | 2,7  |
| 2,7  | 2,7  | 2,7  | 2,7  | 2,7  | 7,9  | 22,5 | 12,5 | 2,7  | 2,7   | 2,7  | 2,7  | 11,5 | 2,7  | 2,7  | 2,7  |
| 2,7  | 2,7  | 2,7  | 2,7  | 2,7  | 2,7  | 2,7  | 2,7  | 2,7  | 11,4  | 2,7  | 2,7  | 12,2 | 2,7  | 2,7  | 2,7  |
| 2,7  | 7,4  | 10,9 | 2,7  | 2,7  | 6,9  | 12,1 | 2,7  | 2,7  | 10,1  | 2,7  | 10,8 | 12,0 | 7,4  | 9,1  | 2,7  |
| 2,7  | 2,7  | 2,7  | 2,7  | 2,7  | 2,7  | 13,4 | 11,7 | 2,7  | 2,7   | 2,7  | 2,7  | 2,7  | 2,7  | 2,7  | 2,7  |
| 2,7  | 7,4  | 14,3 | 11,3 | 7,4  | 7,7  | 14,6 | 12,3 | 10,2 | 10,1  | 9,2  | 12,0 | 14,7 | 7,7  | 2,7  | 9,6  |
| 8,2  | 11,5 | 20,5 | 14,8 | 8,3  | 10,5 | 19,2 | 20,0 | 14,5 | 17,5  | 12,6 | 16,1 | 19,2 | 10,4 | 8,7  | 12,2 |
| 2,7  | 2,7  | 2,7  | 2,7  | 2,7  | 2,7  | 2,7  | 2,7  | 2,7  | 2,7   | 2,7  | 2,7  | 2,7  | 2,7  | 2,7  | 2,7  |
| 23,1 | 2,7  | 37,7 | 2,7  | 12,5 | 2,7  | 2,7  | 61,6 | 24,6 | 2,7   | 2,7  | 2,7  | 2,7  | 2,7  | 2,7  | 2,7  |
| 2,7  | 18,1 | 2,7  | 21,3 | 2,7  | 17,9 | 58,9 | 2,7  | 2,7  | 33,5  | 19,8 | 27,7 | 35,1 | 22,8 | 19,7 | 29,3 |
| 2,7  | 2,7  | 2,7  | 2,7  | 2,7  | 2,7  | 2,7  | 2,7  | 2,7  | 2,7   | 2,7  | 2,7  | 2,7  | 2,7  | 2,7  | 2,7  |
| 2,7  | 2,7  | 2,7  | 2,7  | 2,7  | 2,7  | 2,7  | 2,7  | 2,7  | 2,7   | 2,7  | 2,7  | 2,7  | 2,7  | 2,7  | 2,7  |
| 2,7  | 6,9  | 2,7  | 11,0 | 2,7  | 8,7  | 12,9 | 2,7  | 2,7  | 10,4  | 9,9  | 12,4 | 14,3 | 2,7  | 2,7  | 9,7  |
| 2,7  | 2,7  | 2,7  | 2,7  | 2,7  | 2,7  | 2,7  | 2,7  | 2,7  | 2,7   | 2,7  | 2,7  | 2,7  | 2,7  | 2,7  | 2,7  |
| 2,7  | 2,7  | 2,7  | 2,7  | 2,7  | 7,8  | 2,7  | 2,7  | 2,7  | 18,6  | 16,1 | 2,7  | 2,7  | 2,7  | 2,7  | 2,7  |
| 2,7  | 2,7  | 10,7 | 8,8  | 2,7  | 7,0  | 20,5 | 12,9 | 2,7  | 8,6   | 2,7  | 2,7  | 13,5 | 2,7  | 2,7  | 2,7  |
| 2,7  | 2,7  | 2,7  | 2,7  | 2,7  | 2,7  | 2,7  | 2,7  | 2,7  | 2,7   | 2,7  | 2,7  | 2,7  | 2,7  | 2,7  | 2,7  |
| 13,1 | 2,7  | 29,8 | 21,8 | 8,1  | 2,7  | 2,7  | 19,2 | 12,3 | 2,7   | 2,7  | 2,7  | 2,7  | 2,7  | 2,7  | 2,7  |
| 2,7  | 19,7 | 2,7  | 2,7  | 2,7  | 9,0  | 20,9 | 2,7  | 2,7  | 13,9  | 11,3 | 16,9 | 19,7 | 8,8  | 2,7  | 23,2 |
| 2,7  | 9,0  | 15,0 | 2,7  | 2,7  | 2,7  | 11,9 | 14,3 | 2,7  | 11,8  | 2,7  | 2,7  | 2,7  | 2,7  | 2,7  | 2,7  |
| 2,7  | 2,7  | 2,7  | 2,7  | 2,7  | 2,7  | 2,7  | 2,7  | 2,7  | 2,7   | 2,7  | 2,7  | 2,7  | 2,7  | 2,7  | 2,7  |
| 2,7  | 2,7  | 2,7  | 2,7  | 2,7  | 2,7  | 2,7  | 2,7  | 2,7  | 2,7   | 2,7  | 2,7  | 2,7  | 2,7  | 2,7  | 2,7  |
| 2,7  | 2,7  | 2,7  | 2,7  | 2,7  | 2,7  | 2,7  | 2,7  | 2,7  | 2,7   | 2,7  | 2,7  | 2,7  | 2,7  | 2,7  | 2,7  |
| 2,7  | 2,7  | 2,7  | 2,7  | 2,7  | 2,7  | 2,7  | 2,7  | 2,7  | 2,7   | 2,7  | 2,7  | 2,7  | 2,7  | 2,7  | 2,7  |
| 2,7  | 2,7  | 2,7  | 2,7  | 2,7  | 2,7  | 2,7  | 2,7  | 2,7  | 2,7   | 2,7  | 2,7  | 2,7  | 2,7  | 2,7  | 2,7  |
| 2,7  | 2,7  | 2,7  | 2,7  | 2,7  | 2,7  | 2,7  | 2,7  | 2,7  | 2,7   | 2,7  | 2,7  | 2,7  | 2,7  | 2,7  | 2,7  |
| 2,7  | 2,7  | 2,7  | 2,7  | 2,7  | 2,7  | 2,7  | 2,7  | 2,7  | 2,7   | 2,7  | 2,7  | 2,7  | 2,7  | 2,7  | 2,7  |
| 2    | 2    | 1    | 1    | 1    | 1    | 2    | 2    | 2    | 2     | 2    | 1    | 1    | 2    | 2    | 1    |

| 280<br>B | 300<br>A | 300<br>B | 322<br>A | 322<br>B | 420<br>A | 420<br>B | 438<br>A | 438<br>B | 521<br>A | 521<br>B | 532<br>A | 532<br>B |
|----------|----------|----------|----------|----------|----------|----------|----------|----------|----------|----------|----------|----------|
| 9,0      | 2,7      | 9,6      | 2,7      | 2,7      | 2,7      | 2,7      | 18,9     | 14,8     | 15,9     | 2,7      | 2,7      | 7,4      |
| 2,7      | 2,7      | 2,7      | 8,3      | 2,7      | 2,7      | 2,7      | 2,7      | 2,7      | 2,7      | 2,7      | 2,7      | 2,7      |
| 2,7      | 2,7      | 9,6      | 7,6      | 8,5      | 11,1     | 10,5     | 9,6      | 10,3     | 2,7      | 2,7      | 2,7      | 2,7      |
| 10,8     | 2,7      | 2,7      | 2,7      | 2,7      | 2,7      | 13,9     | 2,7      | 2,7      | 26,5     | 27,6     | 10,0     | 8,8      |
| 11,6     | 2,7      | 2,7      | 2,7      | 2,7      | 2,7      | 2,7      | 2,7      | 2,7      | 2,7      | 2,7      | 2,7      | 2,7      |
| 32,2     | 18,2     | 2,7      | 2,7      | 28,6     | 2,7      | 2,7      | 2,7      | 2,7      | 2,7      | 2,7      | 2,7      | 2,7      |
| 2,7      | 2,7      | 2,7      | 2,7      | 2,7      | 2,7      | 2,7      | 2,7      | 2,7      | 2,7      | 2,7      | 2,7      | 2,7      |
| 2,7      | 2,7      | 11,1     | 2,7      | 2,7      | 2,7      | 2,7      | 2,7      | 2,7      | 2,7      | 2,7      | 2,7      | 2,7      |
| 9,4      | 2,7      | 2,7      | 2,7      | 2,7      | 2,7      | 2,7      | 2,7      | 2,7      | 2,7      | 2,7      | 2,7      | 2,7      |
| 2,7      | 2,7      | 17,8     | 2,7      | 9,5      | 2,7      | 2,7      | 2,7      | 2,7      | 2,7      | 2,7      | 2,7      | 2,7      |
| 2,7      | 2,7      | 2,7      | 2,7      | 2,7      | 2,7      | 2,7      | 2,7      | 2,7      | 2,7      | 2,7      | 15,7     | 2,7      |
| 14,2     | 17,7     | 18,3     | 16,2     | 17,5     | 2,7      | 2,7      | 2,7      | 2,7      | 2,7      | 2,7      | 2,7      | 2,7      |
| 2,7      | 2,7      | 2,7      | 2,7      | 2,7      | 11,3     | 18,2     | 18,5     | 18,1     | 2,7      | 12,8     | 11,4     | 2,7      |
| 2,7      | 2,7      | 2,7      | 2,7      | 2,7      | 2,7      | 2,7      | 2,7      | 2,7      | 2,7      | 11,6     | 2,7      | 2,7      |
| 10,3     | 12,2     | 12,4     | 12,3     | 11,2     | 15,8     | 13,0     | 2,7      | 2,7      | 2,7      | 2,7      | 13,7     | 2,7      |
| 2,7      | 2,7      | 2,7      | 2,7      | 2,7      | 2,7      | 2,7      | 2,7      | 2,7      | 2,7      | 2,7      | 2,7      | 2,7      |
| 2,7      | 2,7      | 2,7      | 2,7      | 2,7      | 2,7      | 2,7      | 2,7      | 2,7      | 2,7      | 2,7      | 6,8      | 6,4      |
| 16,2     | 27,8     | 26,7     | 32,2     | 31,4     | 20,0     | 20,4     | 24,3     | 22,5     | 20,9     | 23,8     | 10,7     | 11,2     |
| 2,7      | 2,7      | 2,7      | 2,7      | 2,7      | 13,9     | 9,5      | 2,7      | 8,8      | 2,7      | 2,7      | 2,7      | 2,7      |
| 2,7      | 2,7      | 2,7      | 2,7      | 2,7      | 2,7      | 2,7      | 10,9     | 2,7      | 10,9     | 2,7      | 2,7      | 2,7      |
| 2,7      | 2,7      | 2,7      | 2,7      | 8,2      | 2,7      | 2,7      | 2,7      | 2,7      | 2,7      | 2,7      | 6,4      | 2,7      |
| 14,2     | 14,5     | 17,4     | 15,4     | 14,5     | 13,6     | 14,6     | 15,6     | 13,0     | 17,6     | 19,5     | 10,7     | 10,7     |
| 15,0     | 10,4     | 9,5      | 9,3      | 9,0      | 2,7      | 2,7      | 2,7      | 2,7      | 2,7      | 10,7     | 2,7      | 10,0     |
| 2,7      | 2,7      | 2,7      | 2,7      | 2,7      | 11,5     | 12,1     | 10,1     | 9,6      | 16,3     | 22,7     | 9,2      | 2,7      |
| 9,0      | 15,5     | 9,8      | 13,2     | 16,5     | 2,7      | 2,7      | 2,7      | 2,7      | 2,7      | 2,7      | 2,7      | 2,7      |
| 2,7      | 2,7      | 2,7      | 2,7      | 2,7      | 10,4     | 10,1     | 17,7     | 8,7      | 37,9     | 14,4     | 6,5      | 17,2     |
| 2,7      | 11,3     | 12,1     | 11,1     | 10,4     | 2,7      | 2,7      | 2,7      | 2,7      | 2,7      | 2,7      | 2,7      | 2,7      |
| 19,8     | 2,7      | 2,7      | 2,7      | 2,7      | 9,8      | 9,9      | 8,8      | 10,2     | 12,9     | 17,1     | 7,4      | 6,6      |
| 13,2     | 14,6     | 16,6     | 15,7     | 14,7     | 2,7      | 2,7      | 2,7      | 2,7      | 2,7      | 2,7      | 2,7      | 2,7      |
| 2,7      | 22,1     | 20,9     | 23,7     | 14,0     | 2,7      | 2,7      | 2,7      | 2,7      | 2,7      | 2,7      | 2,7      | 2,7      |
| 22,6     | 2,7      | 2,7      | 2,7      | 2,7      | 2,7      | 2,7      | 2,7      | 2,7      | 2,7      | 2,7      | 2,7      | 2,7      |
| 9,6      | 2,7      | 2,7      | 2,7      | 11,0     | 10,8     | 9,9      | 8,9      | 9,9      | 16,9     | 26,2     | 10,1     | 8,0      |
| 9,7      | 19,0     | 21,0     | 19,0     | 17,6     | 9,8      | 11,4     | 9,6      | 9,2      | 12,3     | 12,4     | 6,4      | 6,4      |
| 8,7      | 2,7      | 2,7      | 2,7      | 2,7      | 12,3     | 14,3     | 9,4      | 8,7      | 12,2     | 12,6     | 7,0      | 6,9      |
| 2,7      | 2,7      | 2,7      | 2,7      | 2,7      | 8,5      | 9,9      | 7,7      | 7,6      | 10,8     | 11,2     | 5,5      | 5,5      |
| 2,7      | 19,8     | 20,8     | 20,0     | 20,4     | 2,7      | 2,7      | 2,7      | 2,7      | 2,7      | 2,7      | 2,7      | 2,7      |
| 11,7     | 2,7      | 2,7      | 2,7      | 2,7      | 2,7      | 2,7      | 2,7      | 2,7      | 2,7      | 2,7      | 2,7      | 2,7      |
| 2,7      | 2,7      | 2,7      | 2,7      | 2,7      | 13,0     | 16,0     | 12,6     | 11,4     | 14,1     | 13,9     | 7,3      | 8,3      |
| 2,7      | 2,7      | 2,7      | 2,7      | 2,7      | 2,7      | 2,7      | 2,7      | 2,7      | 2,7      | 2,7      | 2,7      | 2,7      |
| 11,9     | 8,9      | 9,9      | 8,4      | 8,4      | 2,7      | 2,7      | 2,7      | 2,7      | 2,7      | 2,7      | 2,7      | 2,7      |
| 2,7      | 2,7      | 2,7      | 2,7      | 2,7      | 2,7      | 2,7      | 2,7      | 2,7      | 2,7      | 2,7      | 2,7      | 2,7      |
| 2,7      | 24,3     | 34,8     | 23,3     | 21,2     | 2,7      | 2,7      | 2,7      | 2,7      | 2,7      | 2,7      | 2,7      | 2,7      |
| 38,8     | 2,7      | 2,7      | 2,7      | 2,7      | 2,7      | 2,7      | 2,7      | 2,7      | 2,7      | 2,7      | 2,7      | 2,7      |
| 26,3     | 8,3      | 10,1     | 8,3      | 7,8      | 24,5     | 31,3     | 17,3     | 18,6     | 27,6     | 35,0     | 16,1     | 12,6     |
| 2,7      | 2,7      | 2,7      | 2,7      | 2,7      | 2,7      | 2,7      | 2,7      | 2,7      | 2,7      | 2,7      | 2,7      | 2,7      |
| 13,0     | 2,7      | 11,3     | 2,7      | 2,7      | 2,7      | 2,7      | 2,7      | 2,7      | 2,7      | 2,7      | 2,7      | 2,7      |
| 2,7      | 22,0     | 21,1     | 17,6     | 17,8     | 2,7      | 2,7      | 2,7      | 2,7      | 2,7      | 2,7      | 2,7      | 2,7      |
| 18,6     | 10,0     | 2,7      | 2,7      | 2,7      | 2,7      | 2,7      | 2,7      | 2,7      | 2,7      | 2,7      | 2,7      | 2,7      |
| 9,2      | 2,7      | 18,6     | 15,9     | 2,7      | 20,3     | 25,8     | 17,1     | 14,8     | 27,5     | 29,5     | 12,9     | 13,7     |
| 2,7      | 9,7      | 9,3      | 7,8      | 7,7      | 9,7      | 12,3     | 8,5      | 2,7      | 2,7      | 2,7      | 6,3      | 2,7      |
| 2,7      | 2,7      | 2,7      | 2,7      | 2,7      | 2,7      | 2,7      | 2,7      | 2,7      | 2,7      | 2,7      | 2,7      | 2,7      |
| 2,7      | 28,2     | 31,0     | 32,9     | 18,4     | 8,5      | 9,4      | 7,7      | 2,7      | 2,7      | 10,8     | 2,7      | 2,7      |
| 19,0     | 2,7      | 8,5      | 2,7      | 15,2     | 2,7      | 2,7      | 2,7      | 2,7      | 11,4     | 2,7      | 2,7      | 2,7      |



|      |      |      |      |      |     |      |      |      |      |      |     |     |
|------|------|------|------|------|-----|------|------|------|------|------|-----|-----|
| 9,5  | 2,7  | 2,7  | 2,7  | 2,7  | 2,7 | 2,7  | 2,7  | 2,7  | 2,7  | 2,7  | 2,7 | 2,7 |
| 2,7  | 2,7  | 2,7  | 2,7  | 2,7  | 2,7 | 2,7  | 2,7  | 2,7  | 2,7  | 2,7  | 2,7 | 2,7 |
| 8,8  | 2,7  | 2,7  | 2,7  | 2,7  | 2,7 | 2,7  | 2,7  | 2,7  | 2,7  | 2,7  | 2,7 | 2,7 |
| 2,7  | 2,7  | 2,7  | 2,7  | 2,7  | 2,7 | 2,7  | 2,7  | 2,7  | 2,7  | 2,7  | 2,7 | 2,7 |
| 2,7  | 11,3 | 8,4  | 10,0 | 10,9 | 2,7 | 2,7  | 2,7  | 2,7  | 2,7  | 2,7  | 2,7 | 2,7 |
| 2,7  | 2,7  | 2,7  | 2,7  | 2,7  | 2,7 | 2,7  | 2,7  | 2,7  | 2,7  | 2,7  | 2,7 | 2,7 |
| 2,7  | 2,7  | 2,7  | 2,7  | 2,7  | 2,7 | 8,3  | 8,4  | 7,8  | 2,7  | 2,7  | 2,7 | 2,7 |
| 2,7  | 2,7  | 2,7  | 2,7  | 2,7  | 2,7 | 2,7  | 2,7  | 2,7  | 2,7  | 2,7  | 2,7 | 2,7 |
| 2,7  | 2,7  | 2,7  | 2,7  | 2,7  | 2,7 | 2,7  | 2,7  | 2,7  | 2,7  | 2,7  | 2,7 | 2,7 |
| 11,7 | 2,7  | 2,7  | 2,7  | 2,7  | 2,7 | 2,7  | 2,7  | 2,7  | 2,7  | 2,7  | 2,7 | 2,7 |
| 2,7  | 2,7  | 2,7  | 8,2  | 2,7  | 9,4 | 15,2 | 13,4 | 11,0 | 12,8 | 2,7  | 6,9 | 7,1 |
| 13,4 | 2,7  | 2,7  | 2,7  | 2,7  | 2,7 | 2,7  | 2,7  | 2,7  | 2,7  | 2,7  | 2,7 | 2,7 |
| 2,7  | 2,7  | 2,7  | 2,7  | 2,7  | 2,7 | 2,7  | 2,7  | 2,7  | 2,7  | 2,7  | 2,7 | 2,7 |
| 13,4 | 2,7  | 2,7  | 2,7  | 2,7  | 2,7 | 9,9  | 9,2  | 2,7  | 2,7  | 2,7  | 2,7 | 2,7 |
| 2,7  | 2,7  | 2,7  | 2,7  | 13,5 | 2,7 | 2,7  | 2,7  | 2,7  | 2,7  | 2,7  | 2,7 | 2,7 |
| 2,7  | 2,7  | 2,7  | 9,2  | 8,2  | 9,3 | 14,6 | 14,1 | 13,1 | 12,1 | 11,1 | 8,1 | 7,1 |
| 2,7  | 10,2 | 2,7  | 2,7  | 8,3  | 2,7 | 2,7  | 2,7  | 2,7  | 2,7  | 2,7  | 2,7 | 2,7 |
| 2,7  | 2,7  | 2,7  | 2,7  | 2,7  | 2,7 | 2,7  | 2,7  | 2,7  | 2,7  | 2,7  | 2,7 | 2,7 |
| 2,7  | 2,7  | 2,7  | 2,7  | 2,7  | 2,7 | 8,4  | 7,9  | 2,7  | 2,7  | 2,7  | 2,7 | 2,7 |
| 2,7  | 2,7  | 2,7  | 2,7  | 2,7  | 2,7 | 2,7  | 2,7  | 2,7  | 2,7  | 2,7  | 2,7 | 2,7 |
| 2,7  | 2,7  | 2,7  | 2,7  | 2,7  | 2,7 | 2,7  | 2,7  | 2,7  | 2,7  | 2,7  | 2,7 | 2,7 |
| 2,7  | 13,2 | 12,4 | 15,5 | 16,3 | 2,7 | 2,7  | 2,7  | 2,7  | 2,7  | 2,7  | 2,7 | 2,7 |
| 8,5  | 2,7  | 2,7  | 2,7  | 2,7  | 2,7 | 2,7  | 2,7  | 2,7  | 2,7  | 2,7  | 2,7 | 2,7 |
| 10,5 | 2,7  | 2,7  | 2,7  | 2,7  | 2,7 | 2,7  | 2,7  | 2,7  | 2,7  | 2,7  | 2,7 | 2,7 |
| 2,7  | 26,3 | 34,7 | 33,3 | 27,8 | 2,7 | 9,2  | 9,0  | 8,4  | 2,7  | 2,7  | 5,9 | 5,8 |
| 2,7  | 2,7  | 2,7  | 2,7  | 2,7  | 8,5 | 10,7 | 13,3 | 14,0 | 2,7  | 2,7  | 8,1 | 6,8 |
| 20,9 | 2,7  | 2,7  | 2,7  | 2,7  | 2,7 | 2,7  | 2,7  | 2,7  | 2,7  | 2,7  | 2,7 | 2,7 |
| 2,7  | 9,5  | 9,7  | 9,8  | 9,5  | 2,7 | 2,7  | 2,7  | 2,7  | 2,7  | 2,7  | 2,7 | 2,7 |
| 2,7  | 2,7  | 2,7  | 2,7  | 2,7  | 2,7 | 2,7  | 2,7  | 2,7  | 2,7  | 2,7  | 2,7 | 2,7 |
| 2,7  | 2,7  | 7,7  | 7,9  | 8,4  | 2,7 | 2,7  | 2,7  | 2,7  | 2,7  | 2,7  | 2,7 | 2,7 |
| 2,7  | 10,3 | 2,7  | 2,7  | 2,7  | 2,7 | 2,7  | 2,7  | 2,7  | 2,7  | 2,7  | 2,7 | 2,7 |
| 10,9 | 2,7  | 2,7  | 2,7  | 2,7  | 2,7 | 2,7  | 2,7  | 2,7  | 2,7  | 2,7  | 2,7 | 2,7 |
| 2,7  | 2,7  | 2,7  | 2,7  | 2,7  | 2,7 | 2,7  | 2,7  | 2,7  | 2,7  | 2,7  | 2,7 | 2,7 |
| 2,7  | 2,7  | 2,7  | 2,7  | 9,5  | 2,7 | 2,7  | 2,7  | 2,7  | 2,7  | 2,7  | 2,7 | 2,7 |
| 14,1 | 2,7  | 2,7  | 2,7  | 2,7  | 2,7 | 2,7  | 2,7  | 2,7  | 2,7  | 2,7  | 2,7 | 2,7 |
| 9,0  | 2,7  | 2,7  | 2,7  | 2,7  | 2,7 | 2,7  | 2,7  | 2,7  | 2,7  | 2,7  | 2,7 | 2,7 |
| 10,4 | 2,7  | 2,7  | 2,7  | 2,7  | 2,7 | 2,7  | 2,7  | 2,7  | 2,7  | 2,7  | 2,7 | 2,7 |
| 2,7  | 2,7  | 2,7  | 2,7  | 2,7  | 2,7 | 2,7  | 2,7  | 2,7  | 2,7  | 2,7  | 2,7 | 2,7 |
| 2,7  | 2,7  | 2,7  | 2,7  | 2,7  | 2,7 | 2,7  | 2,7  | 2,7  | 2,7  | 2,7  | 2,7 | 2,7 |
| 2,7  | 2,7  | 2,7  | 2,7  | 2,7  | 2,7 | 2,7  | 2,7  | 2,7  | 2,7  | 2,7  | 2,7 | 2,7 |
| 2,7  | 2,7  | 2,7  | 2,7  | 2,7  | 2,7 | 2,7  | 2,7  | 2,7  | 2,7  | 2,7  | 2,7 | 2,7 |
| 2,7  | 2,7  | 2,7  | 2,7  | 2,7  | 2,7 | 2,7  | 2,7  | 2,7  | 2,7  | 2,7  | 2,7 | 2,7 |
| 1    | 2    | 2    | 1    | 1    | 2   | 2    | 1    | 1    | 2    | 2    | 1   | 1   |
