# Supplementary material for: A novel approach to evaluation of adsorbents for sampling indoor volatile organic compounds associated with symptom reports
Source: Royal Society of Chemistry journal article supplement (doi:10.1039/b808654k), 2008-01-01
Supplement: tab_s11.pdf [file tab_s11.pdf]

|       |      |      |       |       |      |      |      |      |       |      |      |      |      |      |
|-------|------|------|-------|-------|------|------|------|------|-------|------|------|------|------|------|
| 155,2 | 2,7  | 2,7  | 2,7   | 2,7   | 2,7  | 7,4  | 2,7  | 2,7  | 2,7   | 2,7  | 2,7  | 2,7  | 2,7  | 2,7  |
| 155,7 | 23,5 | 16,3 | 22,9  | 18,4  | 10,5 | 10,5 | 14,0 | 14,9 | 15,2  | 15,4 | 11,0 | 12,1 | 15,2 | 15,2 |
| 156,2 | 2,7  | 2,7  | 2,7   | 2,7   | 2,7  | 2,7  | 2,7  | 2,7  | 2,7   | 2,7  | 2,7  | 2,7  | 2,7  | 2,7  |
| 156,7 | 20,4 | 17,4 | 13,2  | 10,5  | 6,8  | 7,3  | 2,7  | 10,0 | 9,9   | 2,7  | 2,7  | 2,7  | 10,6 | 8,9  |
| 157,2 | 36,6 | 32,5 | 169,3 | 2,7   | 25,6 | 2,7  | 29,0 | 34,7 | 34,1  | 39,0 | 34,6 | 2,7  | 68,8 | 2,7  |
| 157,7 | 2,7  | 2,7  | 2,7   | 178,3 | 2,7  | 29,5 | 2,7  | 2,7  | 2,7   | 2,7  | 2,7  | 39,2 | 2,7  | 55,8 |
| 158,2 | 2,7  | 2,7  | 13,8  | 21,4  | 2,7  | 2,7  | 2,7  | 2,7  | 12,6  | 10,3 | 2,7  | 2,7  | 9,4  | 2,7  |
| 160,2 | 2,7  | 2,7  | 9,4   | 9,3   | 2,7  | 2,7  | 2,7  | 2,7  | 10,5  | 2,7  | 2,7  | 2,7  | 2,7  | 2,7  |
| 160,7 | 2,7  | 2,7  | 9,5   | 8,8   | 2,7  | 2,7  | 2,7  | 2,7  | 2,7   | 2,7  | 2,7  | 2,7  | 8,1  | 2,7  |
| 161,2 | 2,7  | 9,8  | 2,7   | 2,7   | 9,1  | 2,7  | 9,6  | 11,8 | 2,7   | 10,3 | 2,7  | 2,7  | 8,6  | 2,7  |
| 161,7 | 10,9 | 2,7  | 14,3  | 10,5  | 2,7  | 10,5 | 2,7  | 2,7  | 12,7  | 2,7  | 9,5  | 9,8  | 2,7  | 10,5 |
| 162,2 | 2,7  | 2,7  | 2,7   | 2,7   | 7,8  | 2,7  | 2,7  | 2,7  | 2,7   | 2,7  | 2,7  | 2,7  | 2,7  | 2,7  |
| 162,7 | 2,7  | 2,7  | 9,7   | 9,3   | 2,7  | 7,9  | 2,7  | 2,7  | 2,7   | 2,7  | 2,7  | 2,7  | 2,7  | 2,7  |
| 163,2 | 9,0  | 2,7  | 2,7   | 8,7   | 2,7  | 2,7  | 2,7  | 10,6 | 2,7   | 2,7  | 2,7  | 8,6  | 2,7  | 2,7  |
| 163,7 | 14,0 | 11,9 | 2,7   | 2,7   | 2,7  | 2,7  | 2,7  | 2,7  | 2,7   | 2,7  | 10,4 | 10,0 | 2,7  | 2,7  |
| 164,2 | 2,7  | 2,7  | 2,7   | 2,7   | 2,7  | 2,7  | 2,7  | 2,7  | 2,7   | 2,7  | 2,7  | 2,7  | 2,7  | 2,7  |
| 164,7 | 13,6 | 12,6 | 13,1  | 11,7  | 9,9  | 9,9  | 11,5 | 13,6 | 20,1  | 12,8 | 10,5 | 10,9 | 11,0 | 11,1 |
| 165,2 | 2,7  | 2,7  | 2,7   | 2,7   | 2,7  | 2,7  | 2,7  | 2,7  | 14,5  | 2,7  | 2,7  | 2,7  | 2,7  | 2,7  |
| 167,7 | 2,7  | 10,8 | 9,6   | 7,6   | 2,7  | 2,7  | 10,4 | 11,9 | 2,7   | 2,7  | 2,7  | 2,7  | 2,7  | 2,7  |
| 168,2 | 12,5 | 2,7  | 12,9  | 11,9  | 7,3  | 7,7  | 2,7  | 2,7  | 9,5   | 9,7  | 9,6  | 10,7 | 9,3  | 9,8  |
| 168,7 | 10,2 | 9,1  | 8,7   | 7,9   | 2,7  | 2,7  | 2,7  | 2,7  | 2,7   | 8,0  | 11,2 | 10,4 | 8,4  | 7,9  |
| 169,2 | 56,0 | 26,3 | 42,9  | 2,7   | 26,4 | 2,7  | 36,0 | 40,2 | 43,4  | 33,3 | 31,8 | 34,3 | 28,2 | 32,2 |
| 170,2 | 2,7  | 2,7  | 2,7   | 9,5   | 2,7  | 2,7  | 2,7  | 2,7  | 8,6   | 2,7  | 2,7  | 2,7  | 2,7  | 2,7  |
| 174,7 | 10,2 | 9,4  | 7,5   | 2,7   | 7,1  | 2,7  | 15,7 | 19,2 | 8,3   | 8,4  | 8,6  | 2,7  | 8,2  | 2,7  |
| 175,7 | 2,7  | 2,7  | 2,7   | 2,7   | 2,7  | 2,7  | 2,7  | 2,7  | 2,7   | 2,7  | 2,7  | 2,7  | 2,7  | 2,7  |
| 177,2 | 2,7  | 2,7  | 2,7   | 2,7   | 2,7  | 2,7  | 2,7  | 2,7  | 2,7   | 2,7  | 2,7  | 2,7  | 2,7  | 2,7  |
| 177,7 | 2,7  | 16,3 | 2,7   | 2,7   | 9,7  | 2,7  | 16,1 | 19,3 | 28,8  | 2,7  | 16,0 | 10,1 | 11,1 | 2,7  |
| 178,2 | 21,3 | 2,7  | 28,3  | 14,6  | 2,7  | 15,0 | 2,7  | 8,9  | 45,8  | 29,7 | 2,7  | 2,7  | 2,7  | 11,0 |
| 178,7 | 20,9 | 2,7  | 8,8   | 8,1   | 2,7  | 2,7  | 10,5 | 2,7  | 2,7   | 2,7  | 2,7  | 2,7  | 2,7  | 2,7  |
| 179,7 | 2,7  | 2,7  | 2,7   | 2,7   | 2,7  | 2,7  | 13,6 | 2,7  | 12,5  | 2,7  | 2,7  | 2,7  | 2,7  | 2,7  |
| 180,2 | 21,1 | 15,8 | 20,6  | 20,2  | 8,2  | 10,7 | 2,7  | 14,5 | 2,7   | 10,4 | 11,0 | 10,5 | 10,7 | 11,8 |
| 181,2 | 11,8 | 2,7  | 9,6   | 2,7   | 2,7  | 2,7  | 2,7  | 2,7  | 2,7   | 2,7  | 2,7  | 2,7  | 2,7  | 2,7  |
| 182,2 | 2,7  | 2,7  | 2,7   | 2,7   | 2,7  | 2,7  | 2,7  | 2,7  | 2,7   | 2,7  | 2,7  | 2,7  | 2,7  | 2,7  |
| 182,7 | 14,4 | 11,1 | 20,0  | 20,9  | 7,9  | 8,7  | 15,5 | 16,5 | 10,1  | 9,3  | 9,6  | 9,7  | 10,3 | 11,0 |
| 183,2 | 2,7  | 2,7  | 2,7   | 2,7   | 2,7  | 2,7  | 10,7 | 10,4 | 2,7   | 2,7  | 2,7  | 2,7  | 2,7  | 2,7  |
| 183,7 | 13,6 | 9,6  | 10,0  | 10,5  | 7,1  | 2,7  | 2,7  | 2,7  | 10,1  | 8,8  | 8,4  | 8,8  | 8,6  | 9,6  |
| 184,2 | 15,2 | 10,5 | 14,3  | 2,7   | 8,0  | 2,7  | 11,2 | 11,2 | 12,9  | 10,3 | 8,8  | 11,2 | 9,7  | 10,6 |
| 184,7 | 11,1 | 2,7  | 2,7   | 14,0  | 2,7  | 8,5  | 2,7  | 2,7  | 12,8  | 2,7  | 2,7  | 2,7  | 2,7  | 2,7  |
| 185,2 | 2,7  | 2,7  | 2,7   | 2,7   | 2,7  | 2,7  | 2,7  | 2,7  | 2,7   | 2,7  | 2,7  | 2,7  | 2,7  | 2,7  |
| 185,7 | 50,6 | 24,6 | 25,2  | 2,7   | 21,5 | 2,7  | 36,1 | 33,7 | 25,2  | 25,6 | 23,0 | 29,7 | 24,5 | 2,7  |
| 186,2 | 2,7  | 10,7 | 2,7   | 28,3  | 2,7  | 21,6 | 10,7 | 11,0 | 2,7   | 2,7  | 2,7  | 2,7  | 2,7  | 24,2 |
| 186,7 | 13,3 | 2,7  | 16,1  | 26,2  | 10,8 | 13,7 | 2,7  | 2,7  | 12,5  | 10,9 | 10,3 | 11,7 | 12,6 | 11,5 |
| 189,2 | 8,8  | 2,7  | 2,7   | 2,7   | 2,7  | 2,7  | 2,7  | 2,7  | 211,2 | 2,7  | 2,7  | 2,7  | 2,7  | 2,7  |
| 189,7 | 11,0 | 11,0 | 11,4  | 16,8  | 2,7  | 2,7  | 15,3 | 11,4 | 2,7   | 9,5  | 10,3 | 8,9  | 14,7 | 8,6  |
| 192,7 | 2,7  | 14,1 | 2,7   | 7,6   | 2,7  | 2,7  | 14,4 | 14,9 | 2,7   | 13,5 | 2,7  | 2,7  | 2,7  | 2,7  |
| 193,2 | 15,8 | 2,7  | 17,9  | 12,9  | 10,6 | 11,6 | 11,3 | 10,4 | 25,4  | 2,7  | 15,1 | 9,7  | 12,1 | 11,0 |
| 193,7 | 10,7 | 2,7  | 13,0  | 2,7   | 8,4  | 2,7  | 2,7  | 2,7  | 14,3  | 11,7 | 7,9  | 8,4  | 13,5 | 2,7  |
| 194,2 | 2,7  | 2,7  | 2,7   | 18,0  | 2,7  | 9,3  | 2,7  | 2,7  | 2,7   | 10,1 | 2,7  | 2,7  | 11,7 | 11,2 |
| 194,7 | 13,6 | 2,7  | 10,1  | 18,2  | 2,7  | 7,5  | 2,7  | 2,7  | 2,7   | 2,7  | 2,7  | 2,7  | 2,7  | 9,6  |
| 196,2 | 2,7  | 2,7  | 2,7   | 2,7   | 2,7  | 2,7  | 2,7  | 2,7  | 2,7   | 2,7  | 2,7  | 2,7  | 2,7  | 2,7  |
| 196,7 | 10,9 | 2,7  | 2,7   | 2,7   | 2,7  | 2,7  | 2,7  | 2,7  | 2,7   | 2,7  | 2,7  | 2,7  | 2,7  | 2,7  |
| 198,2 | 10,0 | 2,7  | 8,9   | 11,5  | 2,7  | 7,7  | 2,7  | 2,7  | 13,0  | 2,7  | 9,0  | 9,0  | 2,7  | 10,3 |
| 198,7 | 9,3  | 2,7  | 2,7   | 2,7   | 2,7  | 2,7  | 2,7  | 2,7  | 2,7   | 2,7  | 2,7  | 2,7  | 2,7  | 2,7  |
| 199,2 | 13,1 | 10,4 | 13,2  | 2,7   | 7,3  | 2,7  | 10,6 | 10,2 | 10,9  | 10,2 | 8,8  | 9,7  | 10,3 | 9,4  |
| 199,7 | 2,7  | 2,7  | 2,7   | 10,6  | 2,7  | 7,4  | 10,5 | 9,5  | 2,7   | 2,7  | 2,7  | 2,7  | 2,7  | 2,7  |
| 200,2 | 2,7  | 2,7  | 8,1   | 2,7   | 2,7  | 2,7  | 2,7  | 2,7  | 2,7   | 2,7  | 2,7  | 2,7  | 2,7  | 2,7  |
| 200,7 | 2,7  | 11,0 | 2,7   | 7,8   | 2,7  | 2,7  | 2,7  | 2,7  | 2,7   | 2,7  | 2,7  | 2,7  | 2,7  | 2,7  |
| 201,2 | 17,0 | 2,7  | 10,7  | 8,3   | 8,6  | 7,7  | 13,3 | 20,9 | 12,8  | 12,2 | 11,6 | 12,8 | 10,9 | 10,9 |
| 203,7 | 12,0 | 9,0  | 10,9  | 2,7   | 8,2  | 2,7  | 9,8  | 2,7  | 10,4  | 10,8 | 9,1  | 2,7  | 13,2 | 2,7  |

|       |      |       |       |      |      |      |      |       |       |      |      |      |      |      |
|-------|------|-------|-------|------|------|------|------|-------|-------|------|------|------|------|------|
| 204,2 | 2,7  | 9,2   | 2,7   | 10,5 | 2,7  | 9,4  | 10,4 | 9,9   | 2,7   | 2,7  | 2,7  | 10,0 | 2,7  | 11,9 |
| 204,7 | 14,0 | 2,7   | 11,3  | 11,7 | 9,3  | 2,7  | 2,7  | 2,7   | 12,4  | 11,9 | 10,0 | 11,5 | 14,4 | 13,0 |
| 205,2 | 9,7  | 2,7   | 2,7   | 2,7  | 2,7  | 10,5 | 2,7  | 2,7   | 2,7   | 2,7  | 2,7  | 8,2  | 21,0 | 17,0 |
| 205,7 | 48,7 | 32,1  | 91,3  | 2,7  | 50,3 | 2,7  | 22,5 | 44,8  | 70,2  | 27,1 | 22,4 | 2,7  | 33,4 | 2,7  |
| 206,7 | 2,7  | 2,7   | 7,9   | 2,7  | 2,7  | 2,7  | 2,7  | 2,7   | 2,7   | 2,7  | 2,7  | 2,7  | 2,7  | 11,0 |
| 207,2 | 12,5 | 11,8  | 14,8  | 2,7  | 10,2 | 2,7  | 12,2 | 14,6  | 13,6  | 9,3  | 11,8 | 2,7  | 2,7  | 2,7  |
| 207,7 | 2,7  | 2,7   | 8,1   | 11,6 | 2,7  | 12,0 | 2,7  | 2,7   | 2,7   | 2,7  | 2,7  | 2,7  | 2,7  | 2,7  |
| 208,2 | 14,9 | 10,2  | 10,1  | 2,7  | 9,5  | 2,7  | 11,9 | 11,9  | 9,8   | 2,7  | 9,4  | 9,1  | 2,7  | 2,7  |
| 208,7 | 2,7  | 2,7   | 2,7   | 8,9  | 2,7  | 9,3  | 2,7  | 2,7   | 2,7   | 2,7  | 9,2  | 8,7  | 2,7  | 2,7  |
| 209,7 | 2,7  | 2,7   | 2,7   | 2,7  | 2,7  | 7,7  | 2,7  | 2,7   | 2,7   | 2,7  | 2,7  | 2,7  | 2,7  | 2,7  |
| 210,2 | 13,6 | 2,7   | 10,2  | 2,7  | 2,7  | 2,7  | 2,7  | 2,7   | 9,1   | 8,8  | 2,7  | 2,7  | 9,3  | 2,7  |
| 210,7 | 11,0 | 2,7   | 2,7   | 8,9  | 2,7  | 2,7  | 2,7  | 2,7   | 11,5  | 2,7  | 2,7  | 2,7  | 2,7  | 2,7  |
| 211,2 | 2,7  | 2,7   | 10,0  | 2,7  | 2,7  | 13,6 | 11,2 | 12,2  | 8,1   | 10,0 | 10,0 | 10,3 | 12,4 | 2,7  |
| 211,7 | 30,9 | 18,3  | 23,9  | 15,2 | 21,1 | 7,1  | 20,3 | 21,6  | 33,1  | 26,3 | 22,1 | 2,7  | 36,5 | 9,8  |
| 212,2 | 2,7  | 2,7   | 2,7   | 24,1 | 2,7  | 23,1 | 2,7  | 2,7   | 2,7   | 2,7  | 2,7  | 31,3 | 2,7  | 31,3 |
| 212,7 | 2,7  | 2,7   | 2,7   | 2,7  | 2,7  | 2,7  | 2,7  | 2,7   | 2,7   | 2,7  | 2,7  | 2,7  | 2,7  | 2,7  |
| 213,2 | 18,0 | 12,2  | 12,7  | 2,7  | 10,6 | 2,7  | 11,5 | 12,9  | 11,6  | 10,9 | 11,0 | 11,9 | 12,5 | 2,7  |
| 214,7 | 2,7  | 2,7   | 2,7   | 2,7  | 2,7  | 2,7  | 2,7  | 2,7   | 2,7   | 2,7  | 2,7  | 2,7  | 2,7  | 2,7  |
| 215,2 | 13,9 | 9,7   | 9,7   | 2,7  | 9,1  | 2,7  | 10,0 | 11,9  | 10,6  | 10,1 | 9,1  | 10,5 | 10,7 | 2,7  |
| 215,7 | 2,7  | 11,3  | 2,7   | 8,3  | 2,7  | 7,7  | 10,1 | 14,1  | 2,7   | 12,9 | 2,7  | 2,7  | 2,7  | 9,3  |
| 216,2 | 15,4 | 2,7   | 13,7  | 11,3 | 12,0 | 8,3  | 2,7  | 2,7   | 14,0  | 2,7  | 9,2  | 13,6 | 15,2 | 11,5 |
| 218,2 | 11,6 | 2,7   | 9,0   | 2,7  | 2,7  | 2,7  | 10,0 | 10,8  | 2,7   | 9,8  | 9,0  | 2,7  | 8,5  | 2,7  |
| 219,7 | 15,4 | 2,7   | 2,7   | 2,7  | 2,7  | 2,7  | 2,7  | 2,7   | 2,7   | 2,7  | 2,7  | 2,7  | 2,7  | 2,7  |
| 220,2 | 13,4 | 9,5   | 9,6   | 2,7  | 2,7  | 2,7  | 2,7  | 2,7   | 2,7   | 41,8 | 13,0 | 10,0 | 9,2  | 2,7  |
| 220,7 | 15,5 | 2,7   | 2,7   | 9,4  | 2,7  | 2,7  | 2,7  | 2,7   | 2,7   | 2,7  | 2,7  | 2,7  | 2,7  | 9,3  |
| 221,2 | 2,7  | 2,7   | 2,7   | 8,4  | 2,7  | 2,7  | 2,7  | 2,7   | 2,7   | 2,7  | 2,7  | 2,7  | 2,7  | 2,7  |
| 221,7 | 34,5 | 21,5  | 22,8  | 2,7  | 16,6 | 2,7  | 19,2 | 20,1  | 62,1  | 34,7 | 26,2 | 25,8 | 23,9 | 22,2 |
| 222,7 | 2,7  | 2,7   | 2,7   | 2,7  | 2,7  | 2,7  | 2,7  | 2,7   | 83,1  | 11,0 | 2,7  | 2,7  | 2,7  | 2,7  |
| 223,2 | 2,7  | 32,0  | 2,7   | 2,7  | 2,7  | 2,7  | 25,1 | 42,8  | 2,7   | 2,7  | 2,7  | 2,7  | 2,7  | 2,7  |
| 223,7 | 68,4 | 2,7   | 108,2 | 17,2 | 43,5 | 2,7  | 2,7  | 2,7   | 105,7 | 40,5 | 38,8 | 29,1 | 47,1 | 28,6 |
| 224,7 | 2,7  | 2,7   | 2,7   | 2,7  | 2,7  | 2,7  | 2,7  | 2,7   | 2,7   | 2,7  | 2,7  | 2,7  | 2,7  | 2,7  |
| 225,2 | 37,4 | 2,7   | 34,3  | 2,7  | 25,4 | 2,7  | 2,7  | 25,3  | 43,6  | 28,6 | 20,8 | 28,4 | 28,8 | 27,6 |
| 226,2 | 2,7  | 9,4   | 2,7   | 2,7  | 8,5  | 2,7  | 11,0 | 10,6  | 24,0  | 10,9 | 2,7  | 2,7  | 10,8 | 2,7  |
| 226,7 | 36,1 | 17,9  | 30,5  | 9,9  | 14,6 | 8,3  | 15,4 | 16,9  | 27,0  | 19,3 | 24,6 | 10,0 | 19,8 | 10,6 |
| 227,2 | 2,7  | 2,7   | 2,7   | 12,8 | 2,7  | 14,6 | 2,7  | 2,7   | 2,7   | 2,7  | 2,7  | 19,4 | 2,7  | 18,7 |
| 227,7 | 42,1 | 27,4  | 27,6  | 2,7  | 45,8 | 2,7  | 33,0 | 29,5  | 34,3  | 42,3 | 46,2 | 54,8 | 56,1 | 2,7  |
| 228,2 | 14,8 | 11,5  | 10,8  | 19,3 | 2,7  | 43,6 | 2,7  | 2,7   | 63,5  | 13,1 | 2,7  | 2,7  | 2,7  | 49,4 |
| 228,7 | 2,7  | 2,7   | 2,7   | 8,7  | 2,7  | 2,7  | 2,7  | 2,7   | 2,7   | 2,7  | 2,7  | 2,7  | 2,7  | 2,7  |
| 229,2 | 2,7  | 10,1  | 2,7   | 2,7  | 2,7  | 2,7  | 2,7  | 2,7   | 39,8  | 2,7  | 2,7  | 2,7  | 2,7  | 2,7  |
| 230,2 | 2,7  | 2,7   | 2,7   | 2,7  | 9,7  | 2,7  | 2,7  | 2,7   | 2,7   | 11,9 | 9,1  | 13,5 | 10,4 | 2,7  |
| 231,2 | 2,7  | 2,7   | 2,7   | 2,7  | 2,7  | 2,7  | 2,7  | 2,7   | 2,7   | 2,7  | 2,7  | 2,7  | 2,7  | 2,7  |
| 231,7 | 31,4 | 22,5  | 20,3  | 2,7  | 18,1 | 2,7  | 12,5 | 30,1  | 2,7   | 30,1 | 16,5 | 2,7  | 2,7  | 2,7  |
| 232,2 | 16,1 | 16,6  | 2,7   | 11,6 | 2,7  | 17,8 | 8,8  | 2,7   | 31,6  | 12,4 | 2,7  | 31,2 | 18,1 | 24,1 |
| 232,7 | 2,7  | 2,7   | 11,1  | 2,7  | 27,3 | 2,7  | 2,7  | 9,8   | 2,7   | 2,7  | 8,3  | 2,7  | 9,7  | 2,7  |
| 233,2 | 2,7  | 2,7   | 2,7   | 2,7  | 2,7  | 9,1  | 2,7  | 2,7   | 2,7   | 2,7  | 2,7  | 2,7  | 2,7  | 10,0 |
| 234,7 | 11,5 | 2,7   | 11,3  | 2,7  | 2,7  | 2,7  | 2,7  | 2,7   | 17,4  | 12,1 | 11,1 | 2,7  | 2,7  | 2,7  |
| 238,2 | 2,7  | 13,3  | 2,7   | 2,7  | 2,7  | 2,7  | 10,4 | 12,8  | 21,5  | 12,6 | 2,7  | 2,7  | 2,7  | 2,7  |
| 238,7 | 18,8 | 11,2  | 9,3   | 2,7  | 9,4  | 2,7  | 2,7  | 14,8  | 2,7   | 2,7  | 10,7 | 2,7  | 15,4 | 10,5 |
| 239,2 | 2,7  | 2,7   | 10,3  | 19,2 | 2,7  | 12,5 | 2,7  | 2,7   | 2,7   | 2,7  | 9,6  | 10,2 | 2,7  | 2,7  |
| 240,7 | 2,7  | 2,7   | 2,7   | 2,7  | 2,7  | 2,7  | 2,7  | 2,7   | 2,7   | 2,7  | 2,7  | 2,7  | 2,7  | 2,7  |
| 241,2 | 2,7  | 14,5  | 2,7   | 2,7  | 2,7  | 2,7  | 13,5 | 13,7  | 2,7   | 2,7  | 2,7  | 2,7  | 2,7  | 2,7  |
| 241,7 | 14,5 | 23,0  | 12,3  | 11,2 | 11,3 | 2,7  | 25,8 | 2,7   | 19,5  | 11,7 | 12,6 | 15,4 | 14,1 | 13,3 |
| 242,2 | 25,1 | 2,7   | 29,8  | 18,9 | 23,0 | 12,0 | 2,7  | 25,8  | 34,2  | 29,2 | 23,2 | 32,4 | 33,7 | 31,1 |
| 242,7 | 2,7  | 2,7   | 2,7   | 2,7  | 2,7  | 26,2 | 2,7  | 2,7   | 2,7   | 2,7  | 2,7  | 2,7  | 2,7  | 2,7  |
| 243,2 | 2,7  | 2,7   | 8,6   | 2,7  | 2,7  | 2,7  | 2,7  | 2,7   | 2,7   | 2,7  | 10,7 | 2,7  | 2,7  | 2,7  |
| 243,7 | 2,7  | 156,5 | 49,5  | 2,7  | 36,4 | 2,7  | 64,3 | 105,1 | 62,8  | 48,0 | 57,7 | 2,7  | 49,6 | 2,7  |
| 245,2 | 2,7  | 2,7   | 2,7   | 2,7  | 2,7  | 2,7  | 2,7  | 2,7   | 2,7   | 2,7  | 2,7  | 2,7  | 2,7  | 2,7  |
| 245,7 | 9,3  | 2,7   | 7,9   | 2,7  | 7,6  | 2,7  | 2,7  | 11,0  | 12,8  | 9,5  | 8,9  | 9,1  | 8,6  | 8,7  |
| 249,2 | 7,7  | 8,5   | 2,7   | 2,7  | 2,7  | 2,7  | 2,7  | 14,1  | 2,7   | 2,7  | 9,9  | 2,7  | 2,7  | 2,7  |





|       |       |      |      |      |      |      |      |      |      |       |       |       |       |       |       |
|-------|-------|------|------|------|------|------|------|------|------|-------|-------|-------|-------|-------|-------|
| 2,7   | 2,7   | 2,7  | 2,7  | 7,2  | 2,7  | 2,7  | 2,7  | 8,9  | 2,7  | 11,3  | 9,8   | 16,4  | 15,2  | 12,4  | 9,9   |
| 18,4  | 14,9  | 17,5 | 21,2 | 16,4 | 11,7 | 19,2 | 14,3 | 25,2 | 15,6 | 2,7   | 2,7   | 2,7   | 2,7   | 2,7   | 2,7   |
| 2,7   | 2,7   | 2,7  | 2,7  | 2,7  | 2,7  | 2,7  | 2,7  | 2,7  | 2,7  | 9,9   | 2,7   | 2,7   | 2,7   | 8,1   | 2,7   |
| 11,4  | 2,7   | 12,2 | 14,0 | 14,5 | 14,2 | 18,4 | 8,4  | 93,6 | 31,7 | 2,7   | 2,7   | 10,3  | 13,7  | 2,7   | 8,0   |
| 167,8 | 10,3  | 37,5 | 53,4 | 2,7  | 34,2 | 50,8 | 32,9 | 43,2 | 26,0 | 531,4 | 475,8 | 141,1 | 138,1 | 218,3 | 214,8 |
| 2,7   | 155,0 | 2,7  | 12,6 | 36,0 | 2,7  | 8,3  | 2,7  | 12,5 | 7,9  | 2,7   | 2,7   | 2,7   | 2,7   | 2,7   | 9,7   |
| 10,1  | 2,7   | 2,7  | 2,7  | 2,7  | 8,1  | 9,3  | 8,4  | 2,7  | 2,7  | 2,7   | 2,7   | 9,8   | 10,3  | 14,8  | 2,7   |
| 8,8   | 2,7   | 2,7  | 2,7  | 2,7  | 2,7  | 2,7  | 2,7  | 9,3  | 2,7  | 2,7   | 2,7   | 2,7   | 2,7   | 2,7   | 2,7   |
| 9,3   | 8,7   | 2,7  | 2,7  | 7,0  | 7,5  | 2,7  | 2,7  | 2,7  | 2,7  | 2,7   | 2,7   | 2,7   | 9,9   | 2,7   | 2,7   |
| 2,7   | 2,7   | 10,5 | 10,5 | 2,7  | 2,7  | 9,0  | 2,7  | 10,0 | 8,3  | 7,7   | 2,7   | 7,9   | 10,7  | 8,3   | 8,3   |
| 13,6  | 8,8   | 2,7  | 2,7  | 16,5 | 11,2 | 2,7  | 2,7  | 2,7  | 2,7  | 2,7   | 2,7   | 2,7   | 2,7   | 2,7   | 2,7   |
| 9,6   | 2,7   | 2,7  | 2,7  | 8,3  | 8,2  | 2,7  | 2,7  | 12,2 | 2,7  | 2,7   | 2,7   | 2,7   | 12,0  | 2,7   | 2,7   |
| 2,7   | 2,7   | 2,7  | 2,7  | 2,7  | 2,7  | 2,7  | 2,7  | 2,7  | 2,7  | 2,7   | 2,7   | 2,7   | 11,6  | 2,7   | 2,7   |
| 2,7   | 2,7   | 2,7  | 2,7  | 7,8  | 2,7  | 7,8  | 2,7  | 2,7  | 2,7  | 2,7   | 2,7   | 9,1   | 2,7   | 2,7   | 2,7   |
| 2,7   | 2,7   | 2,7  | 2,7  | 2,7  | 2,7  | 2,7  | 2,7  | 2,7  | 8,3  | 2,7   | 2,7   | 2,7   | 2,7   | 2,7   | 2,7   |
| 2,7   | 2,7   | 2,7  | 2,7  | 2,7  | 2,7  | 2,7  | 2,7  | 2,7  | 2,7  | 10,2  | 9,5   | 2,7   | 11,1  | 7,2   | 7,7   |
| 13,3  | 13,9  | 14,0 | 13,7 | 9,1  | 11,0 | 9,9  | 9,7  | 13,8 | 9,5  | 2,7   | 2,7   | 11,1  | 2,7   | 2,7   | 2,7   |
| 2,7   | 2,7   | 2,7  | 2,7  | 7,7  | 2,7  | 2,7  | 2,7  | 2,7  | 2,7  | 2,7   | 2,7   | 2,7   | 2,7   | 2,7   | 2,7   |
| 9,3   | 2,7   | 12,4 | 13,6 | 2,7  | 2,7  | 13,0 | 8,9  | 2,7  | 2,7  | 9,5   | 9,0   | 10,2  | 11,2  | 9,7   | 8,2   |
| 20,8  | 2,7   | 2,7  | 2,7  | 9,0  | 8,0  | 2,7  | 2,7  | 68,3 | 17,9 | 2,7   | 2,7   | 2,7   | 2,7   | 2,7   | 2,7   |
| 17,5  | 29,3  | 10,8 | 11,9 | 7,5  | 6,9  | 8,4  | 7,8  | 2,7  | 2,7  | 32,7  | 2,7   | 2,7   | 2,7   | 25,8  | 26,2  |
| 47,8  | 2,7   | 32,9 | 42,3 | 45,4 | 32,1 | 38,6 | 25,8 | 45,4 | 53,7 | 2,7   | 23,8  | 45,2  | 53,3  | 2,7   | 2,7   |
| 2,7   | 2,7   | 2,7  | 2,7  | 2,7  | 2,7  | 2,7  | 2,7  | 2,7  | 2,7  | 2,7   | 2,7   | 2,7   | 2,7   | 2,7   | 2,7   |
| 8,3   | 2,7   | 41,2 | 61,6 | 2,7  | 6,7  | 12,0 | 12,1 | 9,4  | 8,2  | 2,7   | 8,0   | 8,5   | 8,9   | 8,0   | 8,2   |
| 2,7   | 2,7   | 2,7  | 2,7  | 2,7  | 2,7  | 2,7  | 2,7  | 2,7  | 2,7  | 8,5   | 8,3   | 2,7   | 2,7   | 7,1   | 7,0   |
| 2,7   | 2,7   | 2,7  | 2,7  | 2,7  | 2,7  | 2,7  | 2,7  | 2,7  | 2,7  | 10,3  | 2,7   | 2,7   | 2,7   | 2,7   | 2,7   |
| 2,7   | 2,7   | 17,2 | 15,3 | 10,1 | 2,7  | 19,1 | 12,5 | 16,6 | 11,5 | 2,7   | 8,5   | 11,2  | 13,1  | 13,1  | 21,5  |
| 18,8  | 18,1  | 2,7  | 2,7  | 2,7  | 18,1 | 2,7  | 2,7  | 32,1 | 2,7  | 2,7   | 2,7   | 2,7   | 2,7   | 2,7   | 8,2   |
| 17,4  | 2,7   | 2,7  | 2,7  | 8,6  | 7,2  | 2,7  | 2,7  | 2,7  | 8,3  | 2,7   | 2,7   | 10,6  | 11,3  | 2,7   | 2,7   |
| 2,7   | 2,7   | 2,7  | 2,7  | 2,7  | 2,7  | 15,6 | 12,7 | 17,5 | 10,9 | 12,0  | 9,1   | 19,3  | 23,4  | 10,5  | 9,6   |
| 19,6  | 17,4  | 13,9 | 15,2 | 13,0 | 11,5 | 2,7  | 2,7  | 2,7  | 2,7  | 2,7   | 2,7   | 2,7   | 2,7   | 2,7   | 2,7   |
| 2,7   | 2,7   | 2,7  | 2,7  | 7,6  | 2,7  | 2,7  | 2,7  | 9,2  | 2,7  | 2,7   | 2,7   | 9,3   | 9,6   | 2,7   | 2,7   |
| 2,7   | 2,7   | 2,7  | 2,7  | 2,7  | 2,7  | 2,7  | 2,7  | 2,7  | 2,7  | 9,1   | 8,7   | 19,4  | 20,8  | 8,7   | 8,7   |
| 21,0  | 17,0  | 2,7  | 2,7  | 11,6 | 11,3 | 13,2 | 11,1 | 14,2 | 8,5  | 2,7   | 2,7   | 2,7   | 2,7   | 2,7   | 2,7   |
| 2,7   | 2,7   | 10,8 | 2,7  | 2,7  | 2,7  | 8,7  | 2,7  | 33,0 | 2,7  | 8,1   | 2,7   | 9,9   | 10,4  | 7,4   | 7,9   |
| 13,1  | 2,7   | 2,7  | 2,7  | 9,3  | 7,6  | 2,7  | 8,1  | 29,4 | 7,4  | 9,1   | 8,4   | 2,7   | 2,7   | 7,9   | 7,5   |
| 20,9  | 2,7   | 12,1 | 12,2 | 10,0 | 8,5  | 10,3 | 9,2  | 31,7 | 8,6  | 2,7   | 2,7   | 11,1  | 12,1  | 2,7   | 2,7   |
| 2,7   | 19,6  | 2,7  | 2,7  | 2,7  | 2,7  | 2,7  | 2,7  | 14,4 | 2,7  | 2,7   | 2,7   | 2,7   | 2,7   | 2,7   | 2,7   |
| 2,7   | 2,7   | 2,7  | 2,7  | 2,7  | 2,7  | 2,7  | 2,7  | 2,7  | 2,7  | 33,7  | 22,6  | 2,7   | 2,7   | 21,0  | 20,1  |
| 35,6  | 2,7   | 32,4 | 39,9 | 35,4 | 19,3 | 29,5 | 23,0 | 60,6 | 27,4 | 2,7   | 2,7   | 41,7  | 57,5  | 2,7   | 2,7   |
| 2,7   | 29,2  | 11,8 | 13,4 | 2,7  | 2,7  | 10,5 | 2,7  | 14,1 | 2,7  | 9,9   | 2,7   | 12,3  | 16,4  | 7,6   | 7,5   |
| 24,0  | 14,2  | 2,7  | 2,7  | 17,3 | 15,1 | 2,7  | 9,0  | 18,7 | 7,3  | 2,7   | 2,7   | 2,7   | 2,7   | 2,7   | 2,7   |
| 14,1  | 2,7   | 2,7  | 2,7  | 2,7  | 2,7  | 2,7  | 8,2  | 32,2 | 21,3 | 7,5   | 2,7   | 2,7   | 16,3  | 2,7   | 7,1   |
| 18,3  | 24,8  | 12,8 | 12,7 | 10,6 | 8,9  | 15,9 | 8,6  | 42,6 | 2,7  | 2,7   | 2,7   | 15,9  | 2,7   | 2,7   | 2,7   |
| 2,7   | 8,1   | 14,2 | 2,7  | 2,7  | 2,7  | 14,1 | 2,7  | 13,3 | 10,4 | 10,6  | 9,3   | 11,9  | 17,3  | 9,7   | 16,3  |
| 22,8  | 2,7   | 10,3 | 15,9 | 10,7 | 12,5 | 8,7  | 10,1 | 9,1  | 10,7 | 2,7   | 2,7   | 10,4  | 11,8  | 7,1   | 7,6   |
| 13,5  | 19,8  | 2,7  | 13,2 | 2,7  | 10,0 | 2,7  | 2,7  | 2,7  | 2,7  | 11,7  | 9,5   | 2,7   | 2,7   | 7,4   | 8,7   |
| 11,3  | 2,7   | 2,7  | 11,6 | 11,0 | 2,7  | 8,0  | 2,7  | 16,5 | 14,1 | 2,7   | 2,7   | 2,7   | 2,7   | 2,7   | 2,7   |
| 14,2  | 21,2  | 2,7  | 2,7  | 11,2 | 8,1  | 2,7  | 2,7  | 9,4  | 2,7  | 2,7   | 2,7   | 2,7   | 2,7   | 2,7   | 2,7   |
| 2,7   | 2,7   | 2,7  | 2,7  | 2,7  | 2,7  | 2,7  | 2,7  | 2,7  | 2,7  | 9,0   | 2,7   | 2,7   | 2,7   | 2,7   | 2,7   |
| 8,6   | 2,7   | 2,7  | 2,7  | 2,7  | 2,7  | 2,7  | 2,7  | 8,5  | 2,7  | 2,7   | 2,7   | 10,3  | 10,5  | 2,7   | 2,7   |
| 17,1  | 11,2  | 2,7  | 2,7  | 9,4  | 8,4  | 2,7  | 2,7  | 2,7  | 2,7  | 2,7   | 2,7   | 2,7   | 2,7   | 2,7   | 2,7   |
| 8,5   | 2,7   | 2,7  | 2,7  | 2,7  | 2,7  | 2,7  | 2,7  | 8,6  | 2,7  | 11,9  | 9,0   | 12,2  | 14,9  | 8,1   | 8,9   |
| 13,7  | 2,7   | 10,9 | 13,8 | 9,6  | 9,0  | 10,2 | 9,1  | 9,1  | 8,7  | 2,7   | 2,7   | 2,7   | 2,7   | 2,7   | 2,7   |
| 2,7   | 10,4  | 2,7  | 2,7  | 2,7  | 2,7  | 2,7  | 2,7  | 2,7  | 2,7  | 2,7   | 2,7   | 2,7   | 2,7   | 2,7   | 2,7   |
| 2,7   | 2,7   | 2,7  | 2,7  | 2,7  | 2,7  | 8,2  | 2,7  | 10,5 | 2,7  | 2,7   | 2,7   | 2,7   | 9,3   | 2,7   | 2,7   |
| 2,7   | 2,7   | 2,7  | 2,7  | 2,7  | 2,7  | 2,7  | 2,7  | 13,0 | 2,7  | 14,0  | 16,8  | 12,5  | 15,9  | 9,5   | 9,4   |
| 14,1  | 9,1   | 34,4 | 51,3 | 16,4 | 9,5  | 18,0 | 17,4 | 2,7  | 10,2 | 2,7   | 2,7   | 2,7   | 2,7   | 2,7   | 2,7   |
| 23,6  | 2,7   | 2,7  | 11,5 | 2,7  | 8,5  | 10,7 | 7,9  | 9,0  | 8,6  | 2,7   | 2,7   | 8,7   | 9,2   | 2,7   | 2,7   |

|       |      |      |       |      |      |      |      |       |      |      |      |      |      |      |      |
|-------|------|------|-------|------|------|------|------|-------|------|------|------|------|------|------|------|
| 2,7   | 13,4 | 2,7  | 2,7   | 9,3  | 2,7  | 12,0 | 2,7  | 10,4  | 9,4  | 9,3  | 8,0  | 9,4  | 9,5  | 2,7  | 2,7  |
| 28,0  | 2,7  | 2,7  | 12,3  | 10,4 | 9,5  | 2,7  | 8,7  | 2,7   | 2,7  | 8,9  | 8,3  | 2,7  | 8,4  | 7,1  | 6,9  |
| 2,7   | 15,7 | 2,7  | 2,7   | 2,7  | 2,7  | 2,7  | 2,7  | 13,8  | 2,7  | 15,0 | 2,7  | 2,7  | 2,7  | 11,3 | 11,0 |
| 112,6 | 2,7  | 65,4 | 34,3  | 28,5 | 51,1 | 28,0 | 14,1 | 77,2  | 16,1 | 2,7  | 20,9 | 12,0 | 25,6 | 2,7  | 2,7  |
| 2,7   | 2,7  | 2,7  | 2,7   | 2,7  | 2,7  | 2,7  | 2,7  | 15,5  | 2,7  | 9,1  | 2,7  | 2,7  | 2,7  | 9,5  | 12,4 |
| 16,9  | 8,7  | 13,3 | 12,8  | 9,0  | 10,5 | 12,0 | 9,3  | 2,7   | 2,7  | 2,7  | 8,5  | 9,6  | 18,8 | 2,7  | 2,7  |
| 2,7   | 14,9 | 2,7  | 2,7   | 2,7  | 2,7  | 9,0  | 2,7  | 10,9  | 2,7  | 10,4 | 8,5  | 9,9  | 10,7 | 9,1  | 10,0 |
| 9,8   | 2,7  | 12,3 | 2,7   | 8,0  | 8,4  | 2,7  | 8,5  | 2,7   | 8,3  | 2,7  | 2,7  | 2,7  | 2,7  | 2,7  | 2,7  |
| 11,6  | 10,1 | 2,7  | 2,7   | 2,7  | 2,7  | 2,7  | 2,7  | 2,7   | 2,7  | 9,3  | 2,7  | 2,7  | 2,7  | 2,7  | 2,7  |
| 2,7   | 2,7  | 2,7  | 2,7   | 2,7  | 2,7  | 2,7  | 2,7  | 2,7   | 2,7  | 9,8  | 2,7  | 9,8  | 9,8  | 8,0  | 7,5  |
| 10,3  | 2,7  | 11,3 | 11,8  | 7,7  | 7,4  | 8,8  | 2,7  | 9,1   | 2,7  | 2,7  | 2,7  | 2,7  | 2,7  | 2,7  | 2,7  |
| 2,7   | 11,1 | 2,7  | 2,7   | 2,7  | 2,7  | 2,7  | 2,7  | 9,8   | 2,7  | 2,7  | 2,7  | 2,7  | 2,7  | 2,7  | 2,7  |
| 14,5  | 2,7  | 12,2 | 12,5  | 16,3 | 10,0 | 10,7 | 9,9  | 2,7   | 8,2  | 18,7 | 2,7  | 2,7  | 2,7  | 10,8 | 2,7  |
| 45,6  | 14,2 | 15,8 | 19,0  | 2,7  | 27,1 | 23,2 | 18,0 | 23,8  | 22,3 | 2,7  | 14,6 | 18,8 | 21,1 | 2,7  | 11,1 |
| 2,7   | 38,5 | 12,0 | 12,2  | 23,3 | 2,7  | 2,7  | 2,7  | 8,8   | 2,7  | 2,7  | 2,7  | 2,7  | 2,7  | 2,7  | 2,7  |
| 2,7   | 2,7  | 2,7  | 2,7   | 2,7  | 2,7  | 2,7  | 2,7  | 2,7   | 2,7  | 19,4 | 9,8  | 13,1 | 13,8 | 11,4 | 10,0 |
| 16,6  | 2,7  | 14,5 | 13,8  | 10,6 | 11,2 | 11,5 | 9,6  | 10,9  | 8,5  | 2,7  | 2,7  | 2,7  | 2,7  | 2,7  | 2,7  |
| 2,7   | 2,7  | 2,7  | 2,7   | 2,7  | 2,7  | 2,7  | 2,7  | 18,8  | 9,6  | 10,4 | 8,3  | 9,2  | 10,6 | 7,0  | 6,8  |
| 17,1  | 2,7  | 11,3 | 11,1  | 8,2  | 7,6  | 8,8  | 8,4  | 2,7   | 2,7  | 2,7  | 2,7  | 2,7  | 2,7  | 2,7  | 2,7  |
| 2,7   | 10,9 | 11,2 | 11,4  | 2,7  | 2,7  | 9,0  | 10,3 | 10,8  | 11,3 | 8,5  | 2,7  | 9,9  | 10,4 | 2,7  | 2,7  |
| 13,5  | 2,7  | 2,7  | 2,7   | 10,6 | 11,7 | 2,7  | 7,2  | 2,7   | 2,7  | 2,7  | 2,7  | 2,7  | 2,7  | 2,7  | 2,7  |
| 10,7  | 2,7  | 10,8 | 11,3  | 2,7  | 6,8  | 9,0  | 8,5  | 2,7   | 2,7  | 2,7  | 2,7  | 9,1  | 9,1  | 2,7  | 2,7  |
| 2,7   | 2,7  | 2,7  | 2,7   | 2,7  | 2,7  | 2,7  | 2,7  | 2,7   | 2,7  | 10,0 | 2,7  | 2,7  | 2,7  | 2,7  | 2,7  |
| 16,1  | 2,7  | 10,9 | 12,5  | 7,7  | 47,9 | 9,6  | 9,6  | 2,7   | 25,3 | 8,9  | 2,7  | 9,2  | 9,8  | 2,7  | 2,7  |
| 10,2  | 14,1 | 2,7  | 2,7   | 2,7  | 2,7  | 7,9  | 2,7  | 7,6   | 2,7  | 2,7  | 2,7  | 9,6  | 9,6  | 2,7  | 2,7  |
| 2,7   | 8,3  | 2,7  | 2,7   | 2,7  | 2,7  | 2,7  | 2,7  | 2,7   | 2,7  | 23,9 | 16,3 | 18,2 | 19,2 | 13,4 | 13,2 |
| 36,8  | 2,7  | 26,9 | 27,2  | 17,1 | 31,9 | 21,4 | 17,1 | 21,4  | 18,5 | 2,7  | 2,7  | 2,7  | 2,7  | 2,7  | 2,7  |
| 2,7   | 2,7  | 2,7  | 2,7   | 2,7  | 2,7  | 8,0  | 2,7  | 2,7   | 2,7  | 26,7 | 2,7  | 2,7  | 2,7  | 2,7  | 2,7  |
| 9,6   | 7,9  | 34,7 | 2,7   | 2,7  | 9,0  | 37,2 | 2,7  | 58,7  | 2,7  | 2,7  | 21,0 | 19,6 | 21,6 | 11,7 | 15,3 |
| 70,0  | 2,7  | 2,7  | 38,1  | 43,3 | 51,7 | 2,7  | 27,7 | 2,7   | 12,9 | 2,7  | 2,7  | 2,7  | 2,7  | 2,7  | 2,7  |
| 2,7   | 2,7  | 2,7  | 2,7   | 2,7  | 2,7  | 2,7  | 2,7  | 2,7   | 2,7  | 29,9 | 18,9 | 28,3 | 29,6 | 21,7 | 23,9 |
| 36,7  | 2,7  | 2,7  | 27,0  | 21,3 | 30,4 | 2,7  | 28,6 | 2,7   | 26,4 | 2,7  | 2,7  | 2,7  | 2,7  | 2,7  | 2,7  |
| 12,1  | 2,7  | 2,7  | 11,0  | 2,7  | 2,7  | 9,1  | 8,2  | 8,7   | 2,7  | 28,5 | 14,3 | 10,0 | 9,8  | 13,6 | 18,8 |
| 25,4  | 2,7  | 18,6 | 18,5  | 8,7  | 26,4 | 18,5 | 14,7 | 15,0  | 15,9 | 2,7  | 2,7  | 14,3 | 18,4 | 2,7  | 2,7  |
| 2,7   | 9,4  | 2,7  | 2,7   | 14,6 | 2,7  | 2,7  | 2,7  | 2,7   | 2,7  | 34,5 | 25,3 | 2,7  | 32,2 | 26,6 | 24,7 |
| 73,1  | 21,1 | 26,5 | 36,6  | 27,8 | 43,1 | 38,4 | 28,2 | 33,3  | 41,6 | 10,4 | 2,7  | 35,9 | 11,5 | 8,0  | 7,9  |
| 18,9  | 54,1 | 12,1 | 12,9  | 8,2  | 10,8 | 11,8 | 10,0 | 2,7   | 2,7  | 2,7  | 2,7  | 2,7  | 2,7  | 2,7  | 2,7  |
| 2,7   | 16,5 | 2,7  | 2,7   | 2,7  | 2,7  | 2,7  | 2,7  | 2,7   | 2,7  | 9,9  | 2,7  | 2,7  | 2,7  | 7,3  | 6,9  |
| 12,2  | 2,7  | 10,7 | 11,1  | 2,7  | 10,2 | 9,3  | 8,7  | 2,7   | 2,7  | 2,7  | 2,7  | 2,7  | 10,5 | 2,7  | 2,7  |
| 11,4  | 2,7  | 2,7  | 2,7   | 2,7  | 9,2  | 9,2  | 7,8  | 7,4   | 8,8  | 2,7  | 2,7  | 2,7  | 2,7  | 2,7  | 2,7  |
| 2,7   | 2,7  | 2,7  | 2,7   | 2,7  | 2,7  | 2,7  | 2,7  | 2,7   | 2,7  | 10,5 | 16,8 | 2,7  | 2,7  | 11,4 | 11,8 |
| 55,8  | 2,7  | 15,4 | 21,7  | 2,7  | 30,6 | 31,6 | 21,9 | 31,6  | 33,6 | 14,5 | 2,7  | 19,8 | 18,0 | 8,4  | 10,7 |
| 2,7   | 53,9 | 18,1 | 14,6  | 20,2 | 2,7  | 13,1 | 11,0 | 2,7   | 2,7  | 2,7  | 10,5 | 12,3 | 30,1 | 2,7  | 2,7  |
| 11,6  | 2,7  | 2,7  | 15,4  | 7,5  | 9,3  | 2,7  | 2,7  | 8,2   | 2,7  | 14,3 | 2,7  | 2,7  | 2,7  | 2,7  | 2,7  |
| 12,8  | 18,2 | 2,7  | 2,7   | 2,7  | 2,7  | 2,7  | 2,7  | 2,7   | 2,7  | 2,7  | 2,7  | 2,7  | 17,8 | 2,7  | 8,2  |
| 17,1  | 2,7  | 2,7  | 2,7   | 2,7  | 8,1  | 11,7 | 2,7  | 8,0   | 2,7  | 13,2 | 2,7  | 2,7  | 16,2 | 7,0  | 2,7  |
| 2,7   | 2,7  | 13,1 | 13,6  | 2,7  | 10,9 | 11,1 | 12,5 | 8,3   | 2,7  | 2,7  | 8,8  | 13,6 | 15,1 | 2,7  | 2,7  |
| 11,6  | 2,7  | 24,3 | 9,8   | 10,6 | 2,7  | 7,5  | 10,1 | 8,1   | 2,7  | 2,7  | 2,7  | 2,7  | 7,9  | 2,7  | 2,7  |
| 13,3  | 11,4 | 2,7  | 14,2  | 2,7  | 7,4  | 2,7  | 2,7  | 2,7   | 2,7  | 2,7  | 2,7  | 2,7  | 2,7  | 2,7  | 2,7  |
| 2,7   | 2,7  | 2,7  | 2,7   | 2,7  | 2,7  | 2,7  | 2,7  | 2,7   | 2,7  | 25,5 | 2,7  | 2,7  | 2,7  | 11,8 | 2,7  |
| 2,7   | 2,7  | 15,9 | 17,3  | 2,7  | 2,7  | 14,3 | 10,7 | 10,6  | 10,0 | 2,7  | 12,2 | 12,1 | 14,7 | 2,7  | 12,3 |
| 17,1  | 2,7  | 20,0 | 2,7   | 10,5 | 18,7 | 26,9 | 2,7  | 27,5  | 2,7  | 26,9 | 18,0 | 19,9 | 24,9 | 15,1 | 13,9 |
| 52,6  | 17,9 | 2,7  | 26,6  | 20,5 | 30,0 | 2,7  | 24,2 | 2,7   | 26,4 | 2,7  | 2,7  | 2,7  | 2,7  | 2,7  | 2,7  |
| 2,7   | 36,6 | 2,7  | 2,7   | 2,7  | 2,7  | 2,7  | 2,7  | 2,7   | 2,7  | 2,7  | 2,7  | 2,7  | 2,7  | 7,9  | 7,7  |
| 2,7   | 2,7  | 2,7  | 2,7   | 2,7  | 2,7  | 2,7  | 2,7  | 2,7   | 2,7  | 86,9 | 2,7  | 2,7  | 2,7  | 46,1 | 33,3 |
| 95,3  | 2,7  | 47,3 | 110,0 | 2,7  | 50,5 | 83,7 | 76,8 | 110,4 | 64,4 | 2,7  | 34,1 | 37,4 | 63,1 | 2,7  | 2,7  |
| 2,7   | 2,7  | 2,7  | 2,7   | 2,7  | 2,7  | 2,7  | 2,7  | 2,7   | 2,7  | 2,7  | 2,7  | 2,7  | 11,3 | 7,7  | 7,8  |
| 13,5  | 2,7  | 2,7  | 2,7   | 7,1  | 9,0  | 8,4  | 9,7  | 2,7   | 2,7  | 11,0 | 2,7  | 2,7  | 2,7  | 2,7  | 2,7  |
| 14,3  | 2,7  | 12,8 | 10,0  | 2,7  | 10,0 | 8,9  | 13,2 | 8,9   | 2,7  | 2,7  | 2,7  | 2,7  | 9,6  | 2,7  | 2,7  |

|      |      |      |      |      |      |      |      |      |      |      |      |      |      |       |       |
|------|------|------|------|------|------|------|------|------|------|------|------|------|------|-------|-------|
| 2,7  | 14,7 | 2,7  | 2,7  | 2,7  | 2,7  | 2,7  | 2,7  | 2,7  | 2,7  | 2,7  | 2,7  | 2,7  | 8,6  | 2,7   | 8,9   |
| 2,7  | 2,7  | 2,7  | 2,7  | 2,7  | 2,7  | 2,7  | 2,7  | 2,7  | 2,7  | 2,7  | 21,0 | 9,6  | 2,7  | 2,7   | 14,1  |
| 17,5 | 2,7  | 25,2 | 23,4 | 9,5  | 18,8 | 11,1 | 16,8 | 12,4 | 10,1 | 2,7  | 2,7  | 2,7  | 9,7  | 14,1  | 2,7   |
| 2,7  | 15,7 | 2,7  | 2,7  | 2,7  | 2,7  | 2,7  | 2,7  | 2,7  | 2,7  | 2,7  | 2,7  | 2,7  | 2,7  | 2,7   | 8,4   |
| 2,7  | 2,7  | 2,7  | 9,1  | 2,7  | 2,7  | 11,0 | 13,1 | 2,7  | 2,7  | 11,0 | 2,7  | 2,7  | 2,7  | 9,7   | 2,7   |
| 12,8 | 2,7  | 2,7  | 2,7  | 2,7  | 8,6  | 2,7  | 2,7  | 2,7  | 2,7  | 2,7  | 2,7  | 2,7  | 2,7  | 2,7   | 2,7   |
| 2,7  | 12,6 | 2,7  | 2,7  | 2,7  | 2,7  | 2,7  | 2,7  | 2,7  | 2,7  | 10,2 | 2,7  | 2,7  | 2,7  | 7,2   | 2,7   |
| 2,7  | 2,7  | 2,7  | 2,7  | 2,7  | 2,7  | 8,2  | 9,4  | 2,7  | 2,7  | 2,7  | 2,7  | 2,7  | 10,3 | 2,7   | 13,5  |
| 10,9 | 2,7  | 2,7  | 2,7  | 2,7  | 5,9  | 2,7  | 9,8  | 2,7  | 2,7  | 11,2 | 2,7  | 2,7  | 2,7  | 2,7   | 2,7   |
| 2,7  | 2,7  | 2,7  | 2,7  | 2,7  | 2,7  | 2,7  | 2,7  | 2,7  | 2,7  | 28,8 | 11,7 | 2,7  | 2,7  | 15,0  | 15,0  |
| 14,7 | 2,7  | 16,1 | 17,4 | 10,9 | 18,2 | 14,8 | 12,2 | 11,0 | 9,9  | 2,7  | 2,7  | 12,6 | 15,2 | 2,7   | 2,7   |
| 2,7  | 18,5 | 2,7  | 2,7  | 2,7  | 2,7  | 2,7  | 2,7  | 2,7  | 2,7  | 2,7  | 2,7  | 2,7  | 2,7  | 2,7   | 2,7   |
| 2,7  | 2,7  | 12,2 | 2,7  | 2,7  | 2,7  | 8,9  | 2,7  | 2,7  | 2,7  | 14,5 | 2,7  | 9,7  | 11,7 | 10,1  | 9,6   |
| 9,8  | 2,7  | 2,7  | 10,9 | 8,1  | 9,8  | 2,7  | 10,0 | 2,7  | 2,7  | 2,7  | 2,7  | 2,7  | 2,7  | 2,7   | 2,7   |
| 2,7  | 10,8 | 2,7  | 2,7  | 2,7  | 2,7  | 2,7  | 2,7  | 2,7  | 2,7  | 2,7  | 2,7  | 2,7  | 2,7  | 2,7   | 2,7   |
| 2,7  | 2,7  | 2,7  | 2,7  | 2,7  | 2,7  | 2,7  | 2,7  | 2,7  | 2,7  | 16,9 | 9,9  | 2,7  | 2,7  | 12,2  | 11,2  |
| 19,9 | 2,7  | 15,3 | 15,0 | 10,6 | 13,1 | 13,5 | 9,1  | 11,3 | 9,2  | 2,7  | 2,7  | 9,1  | 12,2 | 2,7   | 2,7   |
| 2,7  | 14,9 | 2,7  | 2,7  | 2,7  | 2,7  | 2,7  | 7,8  | 2,7  | 2,7  | 2,7  | 2,7  | 2,7  | 2,7  | 2,7   | 2,7   |
| 13,5 | 2,7  | 15,5 | 9,1  | 2,7  | 8,0  | 8,0  | 9,8  | 7,8  | 2,7  | 2,7  | 2,7  | 2,7  | 2,7  | 2,7   | 2,7   |
| 2,7  | 2,7  | 2,7  | 2,7  | 2,7  | 2,7  | 2,7  | 2,7  | 2,7  | 2,7  | 11,9 | 9,1  | 2,7  | 49,8 | 130,3 | 147,4 |
| 12,5 | 2,7  | 15,9 | 14,2 | 9,7  | 12,0 | 24,8 | 15,4 | 11,1 | 11,6 | 2,7  | 2,7  | 42,2 | 2,7  | 2,7   | 2,7   |
| 16,6 | 2,7  | 2,7  | 2,7  | 2,7  | 2,7  | 2,7  | 10,5 | 2,7  | 2,7  | 11,4 | 2,7  | 13,4 | 18,4 | 2,7   | 2,7   |
| 2,7  | 2,7  | 14,2 | 25,4 | 2,7  | 10,2 | 14,7 | 15,0 | 11,7 | 16,5 | 2,7  | 2,7  | 2,7  | 19,7 | 2,7   | 2,7   |
| 2,7  | 2,7  | 11,5 | 2,7  | 6,5  | 2,7  | 2,7  | 2,7  | 6,8  | 2,7  | 2,7  | 2,7  | 2,7  | 2,7  | 2,7   | 2,7   |
| 2,7  | 2,7  | 2,7  | 2,7  | 2,7  | 2,7  | 2,7  | 2,7  | 2,7  | 2,7  | 11,6 | 2,7  | 2,7  | 2,7  | 8,4   | 8,2   |
| 9,3  | 2,7  | 2,7  | 2,7  | 5,3  | 8,5  | 8,0  | 2,7  | 7,8  | 2,7  | 2,7  | 2,7  | 2,7  | 2,7  | 2,7   | 2,7   |
| 2,7  | 2,7  | 2,7  | 2,7  | 6,7  | 2,7  | 2,7  | 2,7  | 2,7  | 7,4  | 2,7  | 2,7  | 2,7  | 2,7  | 2,7   | 9,4   |
| 47,5 | 2,7  | 24,8 | 2,7  | 12,6 | 2,7  | 26,5 | 2,7  | 25,5 | 16,8 | 2,7  | 2,7  | 2,7  | 2,7  | 2,7   | 2,7   |
| 2,7  | 2,7  | 30,0 | 30,7 | 2,7  | 26,0 | 17,3 | 19,2 | 2,7  | 7,8  | 2,7  | 2,7  | 2,7  | 2,7  | 2,7   | 2,7   |
| 2,7  | 2,7  | 2,7  | 2,7  | 2,7  | 2,7  | 10,7 | 2,7  | 2,7  | 2,7  | 6,4  | 2,7  | 2,7  | 14,0 | 5,6   | 6,5   |
| 15,0 | 2,7  | 9,7  | 11,9 | 15,0 | 2,7  | 13,6 | 9,8  | 7,4  | 6,5  | 2,7  | 2,7  | 2,7  | 2,7  | 2,7   | 2,7   |
| 2    | 2    | 2    | 2    | 1    | 1    | 2    | 2    | 1    | 1    | 2    | 2    | 1    | 1    | 1     | 1     |





|       |       |       |       |       |       |       |       |       |       |      |      |      |      |       |       |
|-------|-------|-------|-------|-------|-------|-------|-------|-------|-------|------|------|------|------|-------|-------|
| 12,8  | 10,8  | 9,8   | 10,1  | 14,0  | 14,9  | 18,6  | 16,6  | 12,9  | 11,5  | 2,7  | 2,7  | 2,7  | 2,7  | 2,7   | 2,7   |
| 2,7   | 2,7   | 2,7   | 2,7   | 2,7   | 2,7   | 2,7   | 2,7   | 2,7   | 2,7   | 9,6  | 23,2 | 2,7  | 2,7  | 2,7   | 2,7   |
| 2,7   | 2,7   | 2,7   | 2,7   | 2,7   | 2,7   | 2,7   | 2,7   | 8,9   | 2,7   | 9,2  | 24,0 | 15,2 | 22,6 | 11,0  | 16,9  |
| 2,7   | 2,7   | 7,4   | 7,5   | 8,5   | 13,6  | 10,3  | 11,8  | 2,7   | 9,4   | 2,7  | 2,7  | 2,7  | 2,7  | 2,7   | 2,7   |
| 192,9 | 196,5 | 332,0 | 326,2 | 195,1 | 193,3 | 162,4 | 166,2 | 190,0 | 197,1 | 68,0 | 79,9 | 60,4 | 50,4 | 131,7 | 138,3 |
| 2,7   | 2,7   | 2,7   | 2,7   | 2,7   | 2,7   | 2,7   | 2,7   | 2,7   | 2,7   | 2,7  | 2,7  | 2,7  | 2,7  | 2,7   | 2,7   |
| 10,0  | 10,4  | 7,7   | 8,0   | 11,9  | 13,1  | 10,2  | 2,7   | 8,4   | 8,7   | 2,7  | 2,7  | 20,2 | 17,6 | 11,4  | 11,6  |
| 2,7   | 2,7   | 2,7   | 2,7   | 2,7   | 2,7   | 2,7   | 2,7   | 2,7   | 2,7   | 2,7  | 2,7  | 2,7  | 2,7  | 8,0   | 2,7   |
| 2,7   | 2,7   | 2,7   | 2,7   | 2,7   | 9,2   | 2,7   | 2,7   | 2,7   | 2,7   | 2,7  | 2,7  | 2,7  | 2,7  | 2,7   | 2,7   |
| 9,9   | 9,9   | 2,7   | 6,9   | 11,0  | 11,8  | 9,0   | 12,7  | 7,7   | 7,5   | 10,4 | 12,7 | 12,0 | 2,7  | 9,3   | 9,8   |
| 2,7   | 2,7   | 2,7   | 2,7   | 2,7   | 2,7   | 2,7   | 2,7   | 2,7   | 2,7   | 2,7  | 10,7 | 2,7  | 2,7  | 2,7   | 2,7   |
| 2,7   | 2,7   | 2,7   | 2,7   | 2,7   | 10,4  | 2,7   | 2,7   | 2,7   | 2,7   | 2,7  | 2,7  | 2,7  | 2,7  | 2,7   | 2,7   |
| 2,7   | 2,7   | 2,7   | 2,7   | 8,5   | 9,4   | 10,6  | 11,3  | 2,7   | 2,7   | 9,5  | 9,8  | 10,8 | 10,7 | 9,3   | 8,2   |
| 2,7   | 2,7   | 2,7   | 2,7   | 9,7   | 11,5  | 2,7   | 2,7   | 2,7   | 2,7   | 2,7  | 2,7  | 10,9 | 2,7  | 2,7   | 2,7   |
| 2,7   | 2,7   | 2,7   | 2,7   | 2,7   | 2,7   | 2,7   | 2,7   | 2,7   | 2,7   | 2,7  | 2,7  | 2,7  | 2,7  | 2,7   | 2,7   |
| 8,4   | 2,7   | 8,3   | 2,7   | 11,0  | 15,8  | 10,7  | 2,7   | 9,5   | 9,1   | 11,4 | 11,9 | 12,6 | 12,3 | 12,4  | 10,7  |
| 2,7   | 8,2   | 2,7   | 8,0   | 2,7   | 7,9   | 2,7   | 11,1  | 2,7   | 2,7   | 2,7  | 2,7  | 2,7  | 2,7  | 2,7   | 2,7   |
| 2,7   | 2,7   | 2,7   | 2,7   | 2,7   | 2,7   | 2,7   | 2,7   | 2,7   | 2,7   | 2,7  | 2,7  | 2,7  | 2,7  | 2,7   | 2,7   |
| 8,9   | 10,8  | 9,0   | 8,7   | 11,1  | 11,5  | 12,2  | 14,5  | 9,6   | 10,5  | 13,1 | 13,4 | 13,9 | 13,5 | 13,9  | 13,2  |
| 7,5   | 8,4   | 2,7   | 2,7   | 7,7   | 8,8   | 2,7   | 2,7   | 9,2   | 9,7   | 2,7  | 2,7  | 15,9 | 17,0 | 7,1   | 7,6   |
| 2,7   | 2,7   | 19,6  | 2,7   | 2,7   | 44,2  | 2,7   | 2,7   | 32,8  | 2,7   | 85,5 | 92,8 | 57,7 | 80,9 | 2,7   | 47,1  |
| 29,8  | 26,5  | 2,7   | 20,1  | 37,6  | 2,7   | 52,6  | 45,0  | 2,7   | 31,5  | 2,7  | 2,7  | 2,7  | 2,7  | 60,4  | 2,7   |
| 2,7   | 2,7   | 2,7   | 2,7   | 2,7   | 2,7   | 2,7   | 2,7   | 2,7   | 2,7   | 2,7  | 2,7  | 2,7  | 2,7  | 2,7   | 2,7   |
| 11,9  | 11,2  | 2,7   | 8,5   | 8,1   | 9,0   | 10,9  | 11,3  | 2,7   | 8,1   | 10,6 | 2,7  | 2,7  | 2,7  | 8,2   | 2,7   |
| 2,7   | 2,7   | 2,7   | 2,7   | 7,6   | 2,7   | 2,7   | 2,7   | 2,7   | 2,7   | 2,7  | 12,0 | 2,7  | 2,7  | 8,5   | 2,7   |
| 2,7   | 2,7   | 8,3   | 2,7   | 2,7   | 2,7   | 2,7   | 2,7   | 13,2  | 2,7   | 12,1 | 16,8 | 16,5 | 18,1 | 2,7   | 13,0  |
| 12,6  | 12,6  | 2,7   | 11,2  | 19,0  | 21,0  | 12,0  | 13,8  | 2,7   | 10,8  | 2,7  | 2,7  | 2,7  | 2,7  | 9,9   | 2,7   |
| 2,7   | 7,2   | 2,7   | 2,7   | 2,7   | 9,0   | 2,7   | 9,3   | 9,1   | 2,7   | 10,0 | 18,6 | 12,1 | 13,7 | 2,7   | 14,2  |
| 2,7   | 2,7   | 2,7   | 2,7   | 8,6   | 2,7   | 10,2  | 10,4  | 2,7   | 2,7   | 2,7  | 2,7  | 2,7  | 2,7  | 13,5  | 2,7   |
| 11,3  | 12,0  | 10,2  | 10,1  | 13,3  | 16,9  | 14,8  | 14,7  | 14,5  | 14,0  | 16,1 | 18,4 | 16,8 | 19,3 | 25,7  | 24,9  |
| 2,7   | 2,7   | 2,7   | 2,7   | 2,7   | 2,7   | 2,7   | 2,7   | 2,7   | 2,7   | 2,7  | 2,7  | 2,7  | 2,7  | 2,7   | 2,7   |
| 2,7   | 2,7   | 2,7   | 2,7   | 2,7   | 7,8   | 2,7   | 2,7   | 2,7   | 2,7   | 2,7  | 2,7  | 2,7  | 2,7  | 9,6   | 9,3   |
| 14,4  | 14,3  | 10,5  | 10,0  | 14,1  | 15,5  | 11,8  | 11,6  | 12,1  | 12,0  | 10,2 | 9,8  | 21,9 | 11,9 | 2,7   | 37,9  |
| 2,7   | 2,7   | 2,7   | 2,7   | 2,7   | 2,7   | 2,7   | 2,7   | 2,7   | 2,7   | 2,7  | 2,7  | 2,7  | 2,7  | 36,6  | 2,7   |
| 8,0   | 8,2   | 2,7   | 2,7   | 8,1   | 8,4   | 10,1  | 10,2  | 8,7   | 8,4   | 10,1 | 11,7 | 2,7  | 17,9 | 2,7   | 2,7   |
| 8,7   | 2,7   | 8,4   | 2,7   | 9,4   | 10,5  | 12,8  | 2,7   | 9,3   | 10,2  | 12,9 | 12,0 | 13,8 | 14,8 | 16,8  | 15,4  |
| 2,7   | 9,6   | 2,7   | 7,8   | 2,7   | 2,7   | 2,7   | 12,9  | 2,7   | 2,7   | 2,7  | 2,7  | 2,7  | 2,7  | 2,7   | 2,7   |
| 2,7   | 2,7   | 2,7   | 2,7   | 2,7   | 2,7   | 2,7   | 2,7   | 2,7   | 2,7   | 2,7  | 2,7  | 2,7  | 2,7  | 2,7   | 2,7   |
| 25,0  | 2,7   | 17,7  | 2,7   | 26,7  | 40,5  | 41,8  | 2,7   | 29,5  | 27,2  | 73,8 | 81,6 | 56,0 | 90,4 | 84,1  | 44,5  |
| 2,7   | 26,0  | 2,7   | 18,1  | 2,7   | 2,7   | 2,7   | 42,2  | 2,7   | 2,7   | 2,7  | 2,7  | 2,7  | 11,5 | 2,7   | 2,7   |
| 7,1   | 8,0   | 7,7   | 7,7   | 9,0   | 8,6   | 10,8  | 10,9  | 8,9   | 10,7  | 11,3 | 10,2 | 2,7  | 2,7  | 10,8  | 11,2  |
| 2,7   | 2,7   | 2,7   | 2,7   | 2,7   | 2,7   | 2,7   | 2,7   | 2,7   | 2,7   | 2,7  | 2,7  | 2,7  | 13,1 | 2,7   | 2,7   |
| 12,8  | 13,9  | 2,7   | 2,7   | 9,8   | 10,6  | 2,7   | 2,7   | 13,3  | 13,6  | 2,7  | 2,7  | 2,7  | 2,7  | 2,7   | 2,7   |
| 2,7   | 2,7   | 2,7   | 6,4   | 2,7   | 2,7   | 2,7   | 8,7   | 2,7   | 2,7   | 2,7  | 10,2 | 11,7 | 21,6 | 2,7   | 2,7   |
| 12,9  | 12,4  | 8,6   | 9,9   | 15,5  | 15,6  | 12,6  | 14,4  | 13,8  | 11,5  | 13,9 | 18,2 | 18,6 | 2,7  | 12,7  | 12,3  |
| 7,8   | 7,9   | 2,7   | 2,7   | 2,7   | 9,0   | 10,2  | 10,0  | 2,7   | 2,7   | 11,7 | 12,2 | 2,7  | 2,7  | 2,7   | 6,6   |
| 2,7   | 7,8   | 9,0   | 8,6   | 9,2   | 8,2   | 2,7   | 2,7   | 2,7   | 2,7   | 2,7  | 2,7  | 2,7  | 2,7  | 8,2   | 2,7   |
| 2,7   | 2,7   | 2,7   | 2,7   | 2,7   | 2,7   | 2,7   | 2,7   | 2,7   | 2,7   | 11,4 | 2,7  | 2,7  | 13,1 | 2,7   | 2,7   |
| 2,7   | 2,7   | 2,7   | 2,7   | 2,7   | 15,0  | 2,7   | 2,7   | 2,7   | 2,7   | 2,7  | 2,7  | 2,7  | 16,4 | 2,7   | 2,7   |
| 2,7   | 2,7   | 2,7   | 2,7   | 2,7   | 8,4   | 2,7   | 2,7   | 7,6   | 2,7   | 11,7 | 11,9 | 10,8 | 13,9 | 2,7   | 8,4   |
| 2,7   | 2,7   | 2,7   | 2,7   | 7,7   | 2,7   | 10,2  | 9,1   | 2,7   | 2,7   | 2,7  | 2,7  | 2,7  | 11,3 | 10,0  | 2,7   |
| 2,7   | 2,7   | 2,7   | 2,7   | 2,7   | 2,7   | 2,7   | 2,7   | 2,7   | 2,7   | 2,7  | 8,6  | 2,7  | 2,7  | 2,7   | 2,7   |
| 9,2   | 10,8  | 7,8   | 9,0   | 10,5  | 12,1  | 13,4  | 16,0  | 11,1  | 10,7  | 11,2 | 11,2 | 11,5 | 12,0 | 11,2  | 10,3  |
| 2,7   | 2,7   | 2,7   | 2,7   | 2,7   | 2,7   | 9,8   | 2,7   | 2,7   | 2,7   | 2,7  | 2,7  | 11,4 | 12,1 | 2,7   | 2,7   |
| 2,7   | 2,7   | 2,7   | 2,7   | 2,7   | 2,7   | 2,7   | 2,7   | 2,7   | 2,7   | 10,9 | 10,6 | 2,7  | 11,5 | 2,7   | 10,6  |
| 2,7   | 2,7   | 2,7   | 2,7   | 2,7   | 2,7   | 2,7   | 2,7   | 10,3  | 2,7   | 2,7  | 2,7  | 2,7  | 18,7 | 2,7   | 2,7   |
| 10,2  | 2,7   | 8,9   | 9,2   | 10,1  | 14,1  | 13,4  | 2,7   | 2,7   | 10,2  | 15,5 | 17,6 | 13,2 | 2,7  | 25,1  | 22,1  |
| 2,7   | 10,3  | 2,7   | 2,7   | 2,7   | 2,7   | 2,7   | 16,0  | 2,7   | 2,7   | 2,7  | 2,7  | 2,7  | 2,7  | 2,7   | 2,7   |
| 2,7   | 7,4   | 2,7   | 2,7   | 2,7   | 2,7   | 2,7   | 2,7   | 2,7   | 8,4   | 2,7  | 2,7  | 2,7  | 12,7 | 2,7   | 2,7   |

|      |      |      |      |      |      |      |       |      |      |      |      |      |      |       |      |
|------|------|------|------|------|------|------|-------|------|------|------|------|------|------|-------|------|
| 7,7  | 8,1  | 2,7  | 7,2  | 7,1  | 9,2  | 2,7  | 9,6   | 8,5  | 9,3  | 8,9  | 8,9  | 12,8 | 2,7  | 9,7   | 9,0  |
| 7,5  | 7,4  | 2,7  | 7,1  | 2,7  | 2,7  | 2,7  | 9,5   | 2,7  | 2,7  | 9,4  | 9,3  | 2,7  | 2,7  | 7,7   | 7,5  |
| 2,7  | 2,7  | 12,4 | 2,7  | 46,6 | 47,5 | 2,7  | 2,7   | 19,9 | 2,7  | 26,8 | 30,3 | 19,7 | 17,5 | 2,7   | 21,0 |
| 15,8 | 9,2  | 2,7  | 11,6 | 2,7  | 2,7  | 14,1 | 11,5  | 2,7  | 19,9 | 2,7  | 2,7  | 2,7  | 2,7  | 18,4  | 2,7  |
| 10,4 | 10,5 | 2,7  | 2,7  | 12,3 | 12,9 | 11,3 | 2,7   | 12,3 | 18,8 | 10,7 | 15,4 | 14,1 | 19,4 | 13,1  | 11,1 |
| 2,7  | 2,7  | 2,7  | 8,5  | 2,7  | 2,7  | 2,7  | 12,9  | 2,7  | 2,7  | 2,7  | 2,7  | 2,7  | 18,2 | 2,7   | 2,7  |
| 9,3  | 8,5  | 7,6  | 8,1  | 9,8  | 11,2 | 11,4 | 12,9  | 10,8 | 10,9 | 12,1 | 14,0 | 12,5 | 2,7  | 11,0  | 10,4 |
| 2,7  | 2,7  | 2,7  | 2,7  | 2,7  | 2,7  | 2,7  | 2,7   | 2,7  | 2,7  | 2,7  | 10,9 | 2,7  | 2,7  | 2,7   | 2,7  |
| 2,7  | 2,7  | 2,7  | 2,7  | 2,7  | 9,1  | 2,7  | 2,7   | 9,1  | 2,7  | 2,7  | 9,8  | 2,7  | 13,9 | 9,2   | 8,8  |
| 11,6 | 10,8 | 2,7  | 2,7  | 8,4  | 10,7 | 10,6 | 12,5  | 10,6 | 10,0 | 10,7 | 2,7  | 2,7  | 2,7  | 9,2   | 8,2  |
| 2,7  | 2,7  | 2,7  | 2,7  | 2,7  | 2,7  | 2,7  | 2,7   | 2,7  | 2,7  | 10,8 | 12,4 | 11,2 | 16,7 | 2,7   | 9,4  |
| 2,7  | 2,7  | 2,7  | 2,7  | 2,7  | 2,7  | 2,7  | 2,7   | 2,7  | 2,7  | 12,6 | 11,8 | 2,7  | 2,7  | 17,2  | 2,7  |
| 2,7  | 2,7  | 12,2 | 2,7  | 2,7  | 21,5 | 2,7  | 2,7   | 14,7 | 2,7  | 20,0 | 20,5 | 18,6 | 23,3 | 22,1  | 19,1 |
| 26,2 | 15,0 | 2,7  | 11,6 | 13,5 | 2,7  | 15,0 | 14,3  | 10,1 | 19,0 | 2,7  | 2,7  | 2,7  | 2,7  | 2,7   | 2,7  |
| 2,7  | 12,9 | 2,7  | 2,7  | 2,7  | 2,7  | 2,7  | 11,5  | 2,7  | 2,7  | 2,7  | 2,7  | 2,7  | 23,0 | 2,7   | 2,7  |
| 11,7 | 9,8  | 8,9  | 9,2  | 9,7  | 14,9 | 12,9 | 20,2  | 15,1 | 15,4 | 15,9 | 16,8 | 20,3 | 2,7  | 20,3  | 12,8 |
| 2,7  | 2,7  | 2,7  | 2,7  | 2,7  | 2,7  | 2,7  | 2,7   | 2,7  | 2,7  | 2,7  | 2,7  | 2,7  | 2,7  | 2,7   | 2,7  |
| 8,5  | 7,7  | 7,3  | 7,4  | 7,0  | 10,2 | 9,4  | 11,0  | 9,3  | 9,8  | 13,3 | 13,9 | 2,7  | 2,7  | 12,5  | 9,9  |
| 2,7  | 2,7  | 2,7  | 2,7  | 2,7  | 2,7  | 2,7  | 2,7   | 9,5  | 2,7  | 12,1 | 11,6 | 2,7  | 2,7  | 2,7   | 9,5  |
| 8,9  | 8,2  | 2,7  | 2,7  | 6,9  | 10,1 | 2,7  | 2,7   | 2,7  | 10,1 | 2,7  | 2,7  | 2,7  | 2,7  | 10,4  | 2,7  |
| 2,7  | 2,7  | 2,7  | 2,7  | 2,7  | 2,7  | 2,7  | 2,7   | 2,7  | 2,7  | 2,7  | 2,7  | 2,7  | 2,7  | 2,7   | 2,7  |
| 2,7  | 2,7  | 2,7  | 2,7  | 2,7  | 2,7  | 2,7  | 8,9   | 2,7  | 2,7  | 2,7  | 2,7  | 2,7  | 2,7  | 9,7   | 2,7  |
| 2,7  | 2,7  | 2,7  | 2,7  | 7,5  | 9,8  | 2,7  | 2,7   | 2,7  | 2,7  | 14,7 | 20,5 | 2,7  | 2,7  | 12,2  | 9,9  |
| 2,7  | 7,8  | 2,7  | 2,7  | 2,7  | 10,0 | 2,7  | 9,8   | 8,6  | 2,7  | 12,0 | 12,2 | 2,7  | 2,7  | 2,7   | 8,3  |
| 2,7  | 7,7  | 2,7  | 2,7  | 2,7  | 2,7  | 9,4  | 11,7  | 2,7  | 8,8  | 2,7  | 2,7  | 11,3 | 46,9 | 9,9   | 2,7  |
| 19,4 | 17,4 | 12,2 | 12,2 | 15,6 | 26,3 | 17,0 | 25,0  | 19,1 | 20,1 | 34,1 | 36,4 | 42,5 | 2,7  | 28,4  | 31,5 |
| 2,7  | 2,7  | 2,7  | 2,7  | 2,7  | 2,7  | 2,7  | 2,7   | 2,7  | 2,7  | 2,7  | 2,7  | 2,7  | 2,7  | 2,7   | 2,7  |
| 2,7  | 2,7  | 2,7  | 2,7  | 2,7  | 2,7  | 2,7  | 9,6   | 24,9 | 2,7  | 26,1 | 47,5 | 22,2 | 23,1 | 10,1  | 15,6 |
| 24,3 | 14,1 | 21,1 | 13,7 | 31,2 | 57,0 | 15,7 | 27,3  | 2,7  | 28,8 | 2,7  | 2,7  | 2,7  | 2,7  | 20,7  | 2,7  |
| 2,7  | 2,7  | 2,7  | 2,7  | 2,7  | 2,7  | 2,7  | 2,7   | 2,7  | 2,7  | 2,7  | 2,7  | 2,7  | 2,7  | 14,5  | 2,7  |
| 22,6 | 21,0 | 15,7 | 18,0 | 18,1 | 29,5 | 23,3 | 35,1  | 23,4 | 26,3 | 33,8 | 43,7 | 36,4 | 2,7  | 57,3  | 43,8 |
| 2,7  | 2,7  | 2,7  | 2,7  | 2,7  | 2,7  | 2,7  | 2,7   | 2,7  | 2,7  | 2,7  | 2,7  | 2,7  | 2,7  | 2,7   | 2,7  |
| 23,7 | 7,8  | 10,2 | 2,7  | 14,3 | 21,7 | 24,0 | 12,9  | 17,6 | 24,9 | 21,0 | 28,3 | 26,2 | 27,5 | 31,9  | 16,0 |
| 2,7  | 13,3 | 2,7  | 11,3 | 2,7  | 2,7  | 2,7  | 19,5  | 2,7  | 2,7  | 2,7  | 2,7  | 2,7  | 25,5 | 2,7   | 2,7  |
| 30,3 | 35,8 | 12,7 | 18,2 | 21,0 | 37,1 | 20,6 | 2,7   | 24,7 | 31,1 | 29,8 | 21,5 | 31,1 | 2,7  | 25,2  | 16,7 |
| 9,5  | 8,5  | 2,7  | 2,7  | 8,2  | 11,6 | 11,9 | 49,4  | 10,2 | 10,5 | 16,2 | 15,5 | 13,7 | 2,7  | 13,1  | 9,1  |
| 2,7  | 2,7  | 2,7  | 2,7  | 2,7  | 2,7  | 2,7  | 2,7   | 2,7  | 2,7  | 2,7  | 2,7  | 2,7  | 2,7  | 2,7   | 2,7  |
| 2,7  | 2,7  | 2,7  | 2,7  | 2,7  | 2,7  | 10,3 | 2,7   | 2,7  | 9,4  | 2,7  | 11,7 | 2,7  | 12,6 | 2,7   | 2,7  |
| 2,7  | 2,7  | 2,7  | 2,7  | 2,7  | 2,7  | 2,7  | 11,6  | 2,7  | 2,7  | 2,7  | 2,7  | 2,7  | 2,7  | 14,7  | 2,7  |
| 2,7  | 2,7  | 2,7  | 2,7  | 2,7  | 2,7  | 2,7  | 2,7   | 2,7  | 2,7  | 2,7  | 2,7  | 2,7  | 2,7  | 2,7   | 2,7  |
| 2,7  | 2,7  | 6,9  | 2,7  | 2,7  | 25,2 | 11,5 | 2,7   | 29,7 | 2,7  | 12,2 | 2,7  | 16,4 | 12,8 | 19,1  | 16,8 |
| 14,1 | 16,4 | 2,7  | 9,2  | 10,4 | 7,2  | 2,7  | 33,2  | 9,9  | 22,8 | 2,7  | 2,7  | 2,7  | 2,7  | 2,7   | 2,7  |
| 7,4  | 8,9  | 2,7  | 7,9  | 9,3  | 10,6 | 15,0 | 17,5  | 2,7  | 12,0 | 2,7  | 12,4 | 2,7  | 2,7  | 2,7   | 2,7  |
| 2,7  | 2,7  | 2,7  | 2,7  | 2,7  | 2,7  | 2,7  | 2,7   | 2,7  | 2,7  | 9,1  | 12,1 | 11,3 | 11,3 | 2,7   | 8,0  |
| 10,9 | 8,9  | 2,7  | 2,7  | 8,9  | 2,7  | 9,3  | 2,7   | 2,7  | 8,8  | 2,7  | 2,7  | 2,7  | 2,7  | 13,3  | 2,7  |
| 13,1 | 16,5 | 2,7  | 2,7  | 11,0 | 2,7  | 2,7  | 12,6  | 2,7  | 2,7  | 2,7  | 2,7  | 2,7  | 2,7  | 15,5  | 2,7  |
| 9,8  | 7,2  | 2,7  | 7,2  | 2,7  | 2,7  | 14,7 | 18,5  | 2,7  | 12,5 | 2,7  | 2,7  | 2,7  | 2,7  | 2,7   | 2,7  |
| 2,7  | 2,7  | 2,7  | 2,7  | 2,7  | 2,7  | 2,7  | 11,1  | 2,7  | 9,4  | 2,7  | 2,7  | 2,7  | 2,7  | 15,0  | 2,7  |
| 2,7  | 2,7  | 2,7  | 2,7  | 2,7  | 2,7  | 2,7  | 2,7   | 2,7  | 2,7  | 2,7  | 10,8 | 2,7  | 11,6 | 2,7   | 11,9 |
| 2,7  | 2,7  | 9,1  | 2,7  | 2,7  | 2,7  | 2,7  | 2,7   | 13,6 | 2,7  | 14,9 | 26,3 | 21,8 | 26,2 | 2,7   | 12,4 |
| 11,3 | 11,0 | 12,2 | 10,4 | 10,3 | 12,9 | 12,2 | 15,4  | 23,1 | 13,4 | 22,0 | 23,9 | 27,9 | 41,6 | 22,3  | 27,0 |
| 18,7 | 20,0 | 2,7  | 13,4 | 14,9 | 23,5 | 14,9 | 35,4  | 2,7  | 27,4 | 2,7  | 2,7  | 2,7  | 2,7  | 38,1  | 2,7  |
| 2,7  | 2,7  | 15,1 | 2,7  | 2,7  | 2,7  | 2,7  | 2,7   | 2,7  | 2,7  | 2,7  | 9,5  | 19,4 | 14,4 | 2,7   | 55,1 |
| 8,1  | 8,6  | 2,7  | 17,1 | 7,3  | 9,2  | 2,7  | 11,9  | 2,7  | 2,7  | 2,7  | 2,7  | 2,7  | 2,7  | 54,0  | 2,7  |
| 2,7  | 2,7  | 26,9 | 2,7  | 2,7  | 92,2 | 2,7  | 2,7   | 48,7 | 2,7  | 60,6 | 88,3 | 58,4 | 70,0 | 2,7   | 74,0 |
| 41,8 | 41,6 | 2,7  | 24,8 | 35,0 | 2,7  | 31,8 | 105,2 | 2,7  | 43,6 | 2,7  | 2,7  | 2,7  | 2,7  | 116,7 | 2,7  |
| 8,1  | 8,1  | 2,7  | 2,7  | 7,6  | 9,5  | 2,7  | 12,7  | 2,7  | 10,1 | 9,7  | 10,8 | 13,8 | 2,7  | 16,3  | 2,7  |
| 2,7  | 2,7  | 2,7  | 2,7  | 2,7  | 2,7  | 2,7  | 2,7   | 2,7  | 2,7  | 2,7  | 2,7  | 2,7  | 2,7  | 2,7   | 2,7  |
| 2,7  | 2,7  | 2,7  | 2,7  | 2,7  | 2,7  | 2,7  | 9,1   | 2,7  | 2,7  | 2,7  | 2,7  | 2,7  | 2,7  | 12,0  | 2,7  |

|      |      |      |      |      |      |      |      |      |      |      |      |      |      |      |      |
|------|------|------|------|------|------|------|------|------|------|------|------|------|------|------|------|
| 7,4  | 2,7  | 2,7  | 2,7  | 2,7  | 2,7  | 9,1  | 10,6 | 2,7  | 8,4  | 2,7  | 8,8  | 2,7  | 2,7  | 10,2 | 2,7  |
| 11,6 | 2,7  | 9,0  | 2,7  | 10,7 | 12,9 | 12,1 | 2,7  | 12,6 | 14,5 | 15,4 | 24,3 | 27,4 | 33,9 | 2,7  | 11,1 |
| 2,7  | 12,0 | 2,7  | 9,5  | 2,7  | 2,7  | 2,7  | 19,7 | 2,7  | 2,7  | 2,7  | 2,7  | 2,7  | 2,7  | 21,4 | 2,7  |
| 2,7  | 2,7  | 2,7  | 2,7  | 2,7  | 2,7  | 2,7  | 2,7  | 2,7  | 2,7  | 2,7  | 12,7 | 17,7 | 21,9 | 2,7  | 10,0 |
| 17,6 | 23,4 | 2,7  | 2,7  | 7,8  | 8,3  | 2,7  | 10,9 | 2,7  | 9,1  | 10,0 | 2,7  | 2,7  | 2,7  | 14,9 | 2,7  |
| 2,7  | 2,7  | 2,7  | 2,7  | 2,7  | 2,7  | 2,7  | 2,7  | 2,7  | 2,7  | 2,7  | 2,7  | 2,7  | 2,7  | 2,7  | 2,7  |
| 2,7  | 2,7  | 2,7  | 2,7  | 2,7  | 2,7  | 2,7  | 2,7  | 8,8  | 2,7  | 2,7  | 2,7  | 2,7  | 2,7  | 2,7  | 2,7  |
| 8,7  | 10,8 | 2,7  | 2,7  | 12,8 | 14,3 | 2,7  | 10,6 | 2,7  | 12,3 | 2,7  | 2,7  | 2,7  | 2,7  | 2,7  | 2,7  |
| 9,4  | 2,7  | 2,7  | 2,7  | 2,7  | 2,7  | 2,7  | 2,7  | 2,7  | 2,7  | 2,7  | 7,7  | 2,7  | 2,7  | 10,7 | 2,7  |
| 13,0 | 2,7  | 8,9  | 2,7  | 10,6 | 11,6 | 12,1 | 2,7  | 13,8 | 13,0 | 17,0 | 27,3 | 19,4 | 25,2 | 2,7  | 13,7 |
| 2,7  | 11,0 | 2,7  | 10,2 | 2,7  | 2,7  | 2,7  | 15,1 | 2,7  | 2,7  | 2,7  | 2,7  | 2,7  | 2,7  | 25,0 | 2,7  |
| 2,7  | 7,9  | 2,7  | 2,7  | 2,7  | 9,5  | 2,7  | 2,7  | 9,9  | 2,7  | 2,7  | 2,7  | 12,0 | 13,3 | 2,7  | 6,6  |
| 9,7  | 2,7  | 2,7  | 7,2  | 8,9  | 2,7  | 10,8 | 13,6 | 2,7  | 10,1 | 2,7  | 47,0 | 11,3 | 11,5 | 12,1 | 2,7  |
| 2,7  | 2,7  | 2,7  | 2,7  | 2,7  | 2,7  | 2,7  | 2,7  | 2,7  | 2,7  | 34,8 | 2,7  | 2,7  | 2,7  | 12,2 | 2,7  |
| 11,5 | 2,7  | 2,7  | 2,7  | 7,5  | 8,2  | 2,7  | 2,7  | 2,7  | 2,7  | 2,7  | 2,7  | 2,7  | 2,7  | 2,7  | 2,7  |
| 2,7  | 2,7  | 2,7  | 2,7  | 9,0  | 9,8  | 2,7  | 2,7  | 11,1 | 2,7  | 15,6 | 20,9 | 15,7 | 19,9 | 2,7  | 13,1 |
| 9,7  | 9,3  | 2,7  | 9,3  | 2,7  | 2,7  | 2,7  | 14,8 | 2,7  | 11,2 | 2,7  | 2,7  | 2,7  | 2,7  | 17,4 | 2,7  |
| 2,7  | 2,7  | 2,7  | 2,7  | 2,7  | 2,7  | 2,7  | 2,7  | 2,7  | 2,7  | 2,7  | 2,7  | 2,7  | 2,7  | 2,7  | 2,7  |
| 2,7  | 2,7  | 2,7  | 2,7  | 2,7  | 2,7  | 2,7  | 2,7  | 2,7  | 2,7  | 2,7  | 2,7  | 2,7  | 2,7  | 2,7  | 2,7  |
| 23,1 | 2,7  | 15,1 | 2,7  | 10,0 | 10,2 | 15,7 | 2,7  | 15,6 | 22,0 | 19,5 | 26,6 | 23,0 | 30,3 | 17,9 | 28,0 |
| 2,7  | 39,7 | 2,7  | 20,5 | 2,7  | 2,7  | 2,7  | 20,6 | 2,7  | 2,7  | 2,7  | 2,7  | 2,7  | 2,7  | 2,7  | 2,7  |
| 24,7 | 12,0 | 17,2 | 13,9 | 16,0 | 17,2 | 23,1 | 20,5 | 2,7  | 41,0 | 2,7  | 2,7  | 2,7  | 13,2 | 2,7  | 2,7  |
| 2,7  | 9,5  | 2,7  | 2,7  | 8,9  | 2,7  | 2,7  | 11,9 | 2,7  | 2,7  | 10,0 | 2,7  | 12,7 | 2,7  | 2,7  | 8,0  |
| 2,7  | 2,7  | 2,7  | 2,7  | 2,7  | 2,7  | 2,7  | 2,7  | 2,7  | 2,7  | 2,7  | 2,7  | 2,7  | 2,7  | 17,2 | 2,7  |
| 2,7  | 8,9  | 2,7  | 2,7  | 9,6  | 8,0  | 2,7  | 2,7  | 9,9  | 10,5 | 15,6 | 18,5 | 12,3 | 2,7  | 13,0 | 17,6 |
| 2,7  | 2,7  | 2,7  | 2,7  | 2,7  | 2,7  | 2,7  | 2,7  | 2,7  | 2,7  | 2,7  | 2,7  | 2,7  | 2,7  | 2,7  | 2,7  |
| 2,7  | 2,7  | 2,7  | 2,7  | 2,7  | 2,7  | 2,7  | 2,7  | 2,7  | 2,7  | 10,0 | 12,1 | 2,7  | 2,7  | 2,7  | 15,9 |
| 2,7  | 2,7  | 7,7  | 2,7  | 2,7  | 2,7  | 2,7  | 2,7  | 2,7  | 2,7  | 2,7  | 2,7  | 2,7  | 2,7  | 2,7  | 2,7  |
| 2,7  | 2,7  | 2,7  | 2,7  | 2,7  | 2,7  | 2,7  | 2,7  | 2,7  | 2,7  | 2,7  | 2,7  | 2,7  | 2,7  | 2,7  | 2,7  |
| 6,4  | 2,7  | 2,7  | 8,7  | 6,3  | 11,3 | 2,7  | 8,8  | 8,3  | 7,6  | 2,7  | 11,5 | 2,7  | 2,7  | 7,9  | 2,7  |
| 2,7  | 2,7  | 2,7  | 2,7  | 2,7  | 2,7  | 2,7  | 2,7  | 2,7  | 2,7  | 2,7  | 2,7  | 2,7  | 2,7  | 2,7  | 2,7  |
| 2    | 2    | 1    | 1    | 1    | 1    | 2    | 2    | 2    | 2    | 2    | 2    | 1    | 1    | 2    | 2    |

| 280  | 280  | 300  | 300  | 322  | 322  | 420  | 420  | 438  | 438  | 521  | 521  | 532  | 532  |
|------|------|------|------|------|------|------|------|------|------|------|------|------|------|
| A280 | B280 | A300 | B300 | A322 | B322 | A420 | B420 | A438 | B438 | A521 | B521 | A532 | B532 |
| 2,7  | 10,6 | 26,5 | 2,7  | 2,7  | 2,7  | 2,7  | 2,7  | 2,7  | 2,7  | 2,7  | 2,7  | 2,7  | 2,7  |
| 12,0 | 24,4 | 11,9 | 2,7  | 2,7  | 2,7  | 2,7  | 2,7  | 2,7  | 2,7  | 2,7  | 2,7  | 2,7  | 2,7  |
| 2,7  | 2,7  | 2,7  | 2,7  | 2,7  | 2,7  | 2,7  | 2,7  | 2,7  | 2,7  | 2,7  | 2,7  | 2,7  | 2,7  |
| 2,7  | 2,7  | 2,7  | 15,0 | 16,0 | 15,1 | 12,1 | 14,1 | 17,5 | 17,5 | 16,6 | 18,7 | 2,7  | 8,2  |
| 2,7  | 2,7  | 2,7  | 2,7  | 2,7  | 2,7  | 2,7  | 2,7  | 2,7  | 2,7  | 2,7  | 2,7  | 11,9 | 10,0 |
| 20,2 | 18,0 | 17,9 | 2,7  | 2,7  | 2,7  | 2,7  | 2,7  | 2,7  | 2,7  | 2,7  | 2,7  | 2,7  | 2,7  |
| 2,7  | 2,7  | 2,7  | 8,4  | 7,5  | 2,7  | 2,7  | 2,7  | 2,7  | 2,7  | 2,7  | 2,7  | 2,7  | 2,7  |
| 2,7  | 2,7  | 2,7  | 2,7  | 2,7  | 2,7  | 2,7  | 2,7  | 2,7  | 2,7  | 14,6 | 2,7  | 6,6  | 8,6  |
| 10,8 | 15,3 | 10,1 | 31,0 | 31,2 | 31,5 | 10,4 | 13,7 | 2,7  | 2,7  | 2,7  | 14,8 | 11,4 | 2,7  |
| 2,7  | 2,7  | 2,7  | 2,7  | 2,7  | 7,2  | 2,7  | 11,3 | 2,7  | 2,7  | 12,4 | 2,7  | 2,7  | 7,2  |
| 2,7  | 2,7  | 8,3  | 7,6  | 6,8  | 2,7  | 2,7  | 2,7  | 2,7  | 2,7  | 2,7  | 2,7  | 2,7  | 2,7  |
| 18,1 | 27,3 | 17,8 | 17,8 | 19,5 | 19,0 | 16,7 | 24,1 | 25,6 | 24,3 | 17,3 | 19,4 | 10,2 | 12,4 |
| 2,7  | 2,7  | 2,7  | 7,8  | 7,3  | 7,2  | 2,7  | 8,3  | 2,7  | 2,7  | 2,7  | 2,7  | 2,7  | 5,7  |
| 2,7  | 30,8 | 2,7  | 2,7  | 2,7  | 2,7  | 2,7  | 2,7  | 2,7  | 2,7  | 2,7  | 2,7  | 2,7  | 2,7  |
| 12,8 | 2,7  | 15,5 | 15,3 | 13,5 | 18,2 | 13,1 | 22,2 | 19,1 | 18,4 | 21,7 | 20,6 | 11,2 | 13,0 |
| 20,4 | 16,7 | 9,4  | 2,7  | 2,7  | 2,7  | 2,7  | 2,7  | 2,7  | 2,7  | 2,7  | 21,0 | 2,7  | 12,1 |
| 2,7  | 2,7  | 2,7  | 9,3  | 9,4  | 8,7  | 10,1 | 14,1 | 10,5 | 10,1 | 16,5 | 2,7  | 8,5  | 2,7  |
| 9,6  | 10,9 | 2,7  | 2,7  | 2,7  | 2,7  | 2,7  | 2,7  | 2,7  | 2,7  | 2,7  | 2,7  | 2,7  | 2,7  |
| 2,7  | 2,7  | 2,7  | 9,2  | 10,5 | 8,0  | 9,0  | 9,2  | 8,2  | 10,0 | 2,7  | 12,4 | 6,0  | 6,3  |
| 11,3 | 12,1 | 10,0 | 2,7  | 2,7  | 2,7  | 11,9 | 18,7 | 11,1 | 11,1 | 2,7  | 16,6 | 2,7  | 9,0  |
| 9,5  | 11,0 | 8,7  | 2,7  | 2,7  | 2,7  | 2,7  | 2,7  | 2,7  | 2,7  | 2,7  | 2,7  | 2,7  | 2,7  |
| 2,7  | 2,7  | 2,7  | 9,5  | 9,7  | 9,1  | 2,7  | 9,5  | 8,6  | 8,5  | 12,1 | 12,6 | 5,7  | 6,5  |
| 12,5 | 18,5 | 12,9 | 2,7  | 2,7  | 2,7  | 2,7  | 2,7  | 2,7  | 2,7  | 2,7  | 2,7  | 2,7  | 2,7  |
| 2,7  | 2,7  | 2,7  | 12,8 | 13,8 | 12,8 | 8,9  | 13,3 | 10,2 | 9,9  | 12,8 | 13,4 | 7,4  | 9,3  |
| 2,7  | 9,4  | 2,7  | 2,7  | 2,7  | 2,7  | 2,7  | 8,8  | 2,7  | 2,7  | 2,7  | 2,7  | 2,7  | 2,7  |
| 2,7  | 2,7  | 2,7  | 8,3  | 7,9  | 7,6  | 7,8  | 11,1 | 7,7  | 7,4  | 2,7  | 11,3 | 5,9  | 5,8  |
| 10,7 | 17,8 | 13,6 | 2,7  | 2,7  | 2,7  | 2,7  | 2,7  | 2,7  | 8,5  | 2,7  | 2,7  | 2,7  | 2,7  |
| 11,1 | 2,7  | 10,8 | 10,6 | 8,7  | 16,0 | 8,5  | 10,8 | 8,2  | 2,7  | 11,8 | 11,5 | 6,3  | 8,3  |
| 19,2 | 22,9 | 18,5 | 14,4 | 11,3 | 13,6 | 10,0 | 14,0 | 11,0 | 12,6 | 14,2 | 14,4 | 7,0  | 9,3  |
| 2,7  | 2,7  | 2,7  | 10,2 | 9,4  | 9,5  | 9,6  | 17,1 | 9,3  | 10,2 | 14,3 | 13,7 | 8,1  | 7,6  |
| 2,7  | 2,7  | 2,7  | 9,3  | 7,6  | 7,0  | 7,8  | 10,5 | 2,7  | 7,9  | 13,1 | 11,7 | 6,0  | 5,6  |
| 2,7  | 12,1 | 2,7  | 2,7  | 2,7  | 2,7  | 2,7  | 2,7  | 2,7  | 2,7  | 2,7  | 2,7  | 2,7  | 2,7  |
| 10,6 | 2,7  | 15,7 | 2,7  | 2,7  | 2,7  | 2,7  | 2,7  | 2,7  | 2,7  | 2,7  | 2,7  | 2,7  | 2,7  |
| 2,7  | 2,7  | 2,7  | 15,7 | 16,7 | 14,8 | 9,9  | 15,0 | 12,5 | 11,8 | 11,8 | 12,9 | 7,4  | 7,5  |
| 2,7  | 9,9  | 8,9  | 2,7  | 7,5  | 2,7  | 2,7  | 16,2 | 2,7  | 2,7  | 2,7  | 2,7  | 2,7  | 2,7  |
| 18,7 | 36,4 | 23,2 | 2,7  | 2,7  | 2,7  | 2,7  | 2,7  | 2,7  | 2,7  | 2,7  | 2,7  | 2,7  | 2,7  |
| 2,7  | 2,7  | 2,7  | 2,7  | 2,7  | 2,7  | 2,7  | 2,7  | 17,1 | 17,5 | 2,7  | 2,7  | 2,7  | 2,7  |
| 2,7  | 18,8 | 2,7  | 27,0 | 19,5 | 21,0 | 12,5 | 34,5 | 2,7  | 2,7  | 29,2 | 25,8 | 11,7 | 17,0 |
| 2,7  | 2,7  | 2,7  | 2,7  | 2,7  | 2,7  | 2,7  | 2,7  | 2,7  | 2,7  | 2,7  | 2,7  | 2,7  | 2,7  |
| 9,9  | 11,9 | 2,7  | 2,7  | 2,7  | 7,0  | 2,7  | 9,1  | 2,7  | 2,7  | 2,7  | 2,7  | 2,7  | 2,7  |
| 2,7  | 2,7  | 2,7  | 11,0 | 9,5  | 7,9  | 2,7  | 9,4  | 7,5  | 7,6  | 11,5 | 12,0 | 2,7  | 5,8  |
| 27,7 | 33,1 | 23,6 | 2,7  | 2,7  | 2,7  | 2,7  | 2,7  | 2,7  | 2,7  | 2,7  | 2,7  | 2,7  | 2,7  |
| 2,7  | 2,7  | 2,7  | 2,7  | 2,7  | 2,7  | 2,7  | 2,7  | 2,7  | 2,7  | 2,7  | 2,7  | 2,7  | 2,7  |
| 10,1 | 22,1 | 9,7  | 23,7 | 16,7 | 15,9 | 17,7 | 26,2 | 18,9 | 20,4 | 34,1 | 33,6 | 14,1 | 17,0 |
| 9,8  | 11,6 | 16,1 | 2,7  | 8,4  | 2,7  | 2,7  | 9,9  | 2,7  | 2,7  | 2,7  | 2,7  | 2,7  | 2,7  |
| 8,7  | 10,8 | 9,2  | 19,3 | 8,5  | 16,5 | 2,7  | 11,3 | 16,8 | 16,8 | 2,7  | 2,7  | 6,7  | 7,3  |
| 2,7  | 2,7  | 2,7  | 8,6  | 2,7  | 7,5  | 2,7  | 2,7  | 2,7  | 2,7  | 2,7  | 2,7  | 2,7  | 2,7  |
| 18,0 | 38,0 | 17,8 | 9,9  | 8,0  | 8,1  | 8,1  | 9,9  | 8,4  | 8,1  | 2,7  | 11,0 | 2,7  | 6,9  |
| 2,7  | 2,7  | 2,7  | 2,7  | 2,7  | 2,7  | 2,7  | 2,7  | 2,7  | 2,7  | 11,7 | 2,7  | 5,8  | 2,7  |
| 2,7  | 2,7  | 2,7  | 23,6 | 19,0 | 21,8 | 15,8 | 46,5 | 20,9 | 20,5 | 2,7  | 24,8 | 15,1 | 14,6 |
| 9,0  | 10,2 | 12,0 | 2,7  | 2,7  | 2,7  | 2,7  | 2,7  | 2,7  | 2,7  | 2,7  | 2,7  | 2,7  | 2,7  |
| 2,7  | 2,7  | 2,7  | 2,7  | 2,7  | 2,7  | 2,7  | 2,7  | 2,7  | 2,7  | 2,7  | 2,7  | 2,7  | 2,7  |
| 2,7  | 2,7  | 2,7  | 12,9 | 12,1 | 11,9 | 8,9  | 12,7 | 10,1 | 9,8  | 2,7  | 11,5 | 2,7  | 6,1  |





|      |      |      |      |     |      |     |      |     |     |      |      |     |     |
|------|------|------|------|-----|------|-----|------|-----|-----|------|------|-----|-----|
| 9,4  | 2,7  | 2,7  | 2,7  | 7,7 | 2,7  | 2,7 | 2,7  | 2,7 | 2,7 | 2,7  | 2,7  | 2,7 | 2,7 |
| 11,9 | 17,0 | 12,6 | 2,7  | 2,7 | 2,7  | 2,7 | 2,7  | 2,7 | 2,7 | 2,7  | 2,7  | 2,7 | 2,7 |
| 2,7  | 2,7  | 2,7  | 2,7  | 2,7 | 2,7  | 2,7 | 2,7  | 2,7 | 2,7 | 2,7  | 2,7  | 2,7 | 2,7 |
| 2,7  | 2,7  | 10,9 | 2,7  | 2,7 | 2,7  | 2,7 | 2,7  | 2,7 | 2,7 | 2,7  | 2,7  | 2,7 | 2,7 |
| 15,4 | 16,1 | 2,7  | 2,7  | 2,7 | 2,7  | 2,7 | 2,7  | 2,7 | 2,7 | 2,7  | 2,7  | 2,7 | 2,7 |
| 29,2 | 26,3 | 2,7  | 12,3 | 9,1 | 10,0 | 2,7 | 2,7  | 2,7 | 9,0 | 2,7  | 2,7  | 2,7 | 2,7 |
| 2,7  | 2,7  | 2,7  | 2,7  | 2,7 | 2,7  | 8,6 | 10,8 | 2,7 | 2,7 | 20,2 | 17,6 | 6,5 | 6,1 |
| 10,7 | 10,6 | 2,7  | 2,7  | 2,7 | 2,7  | 2,7 | 2,7  | 2,7 | 2,7 | 2,7  | 2,7  | 2,7 | 2,7 |
| 27,2 | 25,8 | 2,7  | 9,7  | 8,9 | 8,7  | 2,7 | 2,7  | 2,7 | 2,7 | 2,7  | 2,7  | 2,7 | 2,7 |
| 16,3 | 19,4 | 15,7 | 2,7  | 2,7 | 2,7  | 2,7 | 2,7  | 2,7 | 2,7 | 2,7  | 2,7  | 2,7 | 2,7 |
| 2,7  | 2,7  | 2,7  | 2,7  | 2,7 | 2,7  | 2,7 | 2,7  | 2,7 | 2,7 | 2,7  | 2,7  | 2,7 | 2,7 |
| 2,7  | 10,7 | 2,7  | 2,7  | 2,7 | 2,7  | 2,7 | 2,7  | 2,7 | 2,7 | 2,7  | 2,7  | 2,7 | 2,7 |
| 2,7  | 12,0 | 2,7  | 2,7  | 2,7 | 2,7  | 2,7 | 2,7  | 2,7 | 2,7 | 2,7  | 2,7  | 2,7 | 2,7 |
| 2,7  | 2,7  | 2,7  | 2,7  | 8,4 | 9,0  | 2,7 | 2,7  | 9,6 | 8,5 | 2,7  | 2,7  | 2,7 | 2,7 |
| 11,0 | 12,5 | 8,8  | 12,0 | 2,7 | 2,7  | 8,4 | 11,1 | 2,7 | 2,7 | 12,5 | 12,5 | 6,1 | 6,5 |
| 11,5 | 14,5 | 10,2 | 2,7  | 2,7 | 2,7  | 2,7 | 2,7  | 2,7 | 2,7 | 2,7  | 2,7  | 2,7 | 2,7 |
| 2,7  | 2,7  | 2,7  | 2,7  | 2,7 | 2,7  | 2,7 | 2,7  | 2,7 | 2,7 | 2,7  | 2,7  | 2,7 | 2,7 |
| 2,7  | 2,7  | 2,7  | 2,7  | 2,7 | 2,7  | 2,7 | 2,7  | 2,7 | 2,7 | 2,7  | 2,7  | 2,7 | 2,7 |
| 2,7  | 2,7  | 2,7  | 2,7  | 2,7 | 2,7  | 2,7 | 2,7  | 2,7 | 2,7 | 2,7  | 2,7  | 2,7 | 2,7 |
| 29,2 | 38,0 | 22,6 | 2,7  | 2,7 | 2,7  | 2,7 | 2,7  | 2,7 | 2,7 | 2,7  | 2,7  | 2,7 | 2,7 |
| 2,7  | 2,7  | 2,7  | 2,7  | 2,7 | 6,9  | 2,7 | 2,7  | 2,7 | 2,7 | 2,7  | 2,7  | 2,7 | 2,7 |
| 2,7  | 2,7  | 2,7  | 2,7  | 2,7 | 2,7  | 2,7 | 2,7  | 2,7 | 2,7 | 2,7  | 2,7  | 2,7 | 2,7 |
| 9,2  | 10,1 | 7,0  | 2,7  | 2,7 | 2,7  | 2,7 | 2,7  | 2,7 | 2,7 | 2,7  | 2,7  | 2,7 | 2,7 |
| 9,6  | 18,4 | 2,7  | 15,1 | 6,8 | 2,7  | 2,7 | 2,7  | 2,7 | 2,7 | 2,7  | 2,7  | 2,7 | 2,7 |
| 13,5 | 2,7  | 2,7  | 2,7  | 2,7 | 2,7  | 2,7 | 2,7  | 2,7 | 2,7 | 2,7  | 2,7  | 2,7 | 2,7 |
| 2,7  | 2,7  | 2,7  | 2,7  | 2,7 | 2,7  | 2,7 | 2,7  | 2,7 | 2,7 | 2,7  | 2,7  | 2,7 | 2,7 |
| 11,1 | 13,8 | 2,7  | 2,7  | 2,7 | 2,7  | 2,7 | 2,7  | 2,7 | 2,7 | 2,7  | 2,7  | 2,7 | 2,7 |
| 2,7  | 2,7  | 2,7  | 2,7  | 2,7 | 2,7  | 2,7 | 2,7  | 2,7 | 2,7 | 2,7  | 2,7  | 2,7 | 2,7 |
| 2,7  | 2,7  | 2,7  | 2,7  | 2,7 | 2,7  | 2,7 | 2,7  | 2,7 | 2,7 | 2,7  | 2,7  | 2,7 | 2,7 |
| 2,7  | 2,7  | 7,4  | 2,7  | 2,7 | 2,7  | 2,7 | 2,7  | 2,7 | 2,7 | 2,7  | 2,7  | 2,7 | 2,7 |
| 2,7  | 2,7  | 2,7  | 2,7  | 2,7 | 2,7  | 2,7 | 2,7  | 2,7 | 2,7 | 2,7  | 2,7  | 2,7 | 2,7 |
| 1    | 1    | 2    | 2    | 1   | 1    | 2   | 2    | 1   | 1   | 2    | 2    | 1   | 1   |
