# Supplementary material for: A novel approach to evaluation of adsorbents for sampling indoor volatile organic compounds associated with symptom reports
Source: Royal Society of Chemistry journal article supplement (doi:10.1039/b808654k), 2008-01-01
Supplement: tab_s12.pdf [file tab_s12.pdf]

**Table S12.** The most important peaks and their VIP values, in PLS-DA models separating SBS cases and controls, with different adsorbents.

| Carbopack B |       | Chromosorb 106 |       | Tenax TA |       |
|-------------|-------|----------------|-------|----------|-------|
| Rel RT      | VIP   | Rel RT         | VIP   | Rel RT   | VIP   |
| 156,7       | 1,661 | 221,2          | 1,553 | 208,7    | 1,855 |
| 243,2       | 1,555 | 204,7          | 1,488 | 156,7    | 1,710 |
| 150,7       | 1,359 | ΣVOC           | 1,486 | 254,2    | 1,668 |
| 153,7       | 1,291 | 207,7          | 1,435 | 107,7    | 1,512 |
| 123,2       | 1,271 | 144,2          | 1,387 | 245,7    | 1,500 |
| 284         | 1,266 | 131,7          | 1,366 | 131,2    | 1,436 |
| 312         | 1,231 | 123,2          | 1,330 | 194,7    | 1,396 |
| 232,7       | 1,121 | 208,2          | 1,152 | 229,2    | 1,380 |
| 226,7       | 1,054 | 244,2          | 1,142 | 201,2    | 1,366 |
| 231,7       | 0,976 | 141,7          | 1,128 | 243,7    | 1,347 |
| 156,2       | 0,937 | 165,2          | 1,097 | 238,2    | 1,332 |
| 107,7       | 0,912 | 106,7          | 1,095 | 174,7    | 1,301 |
| 158,2       | 0,844 | 110,7          | 1,086 | 168,2    | 1,298 |
| 192,7       | 0,779 | 212,2          | 1,082 | 215,2    | 1,285 |
| 241,7       | 0,760 | 179,7          | 1,079 | 160,7    | 1,269 |
| 110,7       | 0,729 | 302            | 1,075 | 198,2    | 1,245 |
| 84,7        | 0,701 | 279            | 1,063 | 158,2    | 1,222 |
| 107,2       | 0,691 | 57,7           | 1,053 | 227,7    | 1,218 |
| 278         | 0,645 | 88,7           | 1,052 | 149,2    | 1,203 |
| 155,7       | 0,585 | 201,2          | 1,037 | 258,7    | 1,200 |
| ΣVOC        | 0,499 | 144,7          | 1,032 | 170,2    | 1,183 |
| 207,2       | 0,352 | 130,2          | 1,003 | 205,2    | 1,153 |
| 206,2       | 0,147 | 151,2          | 0,999 | 72,2     | 1,142 |
|             |       | 225,2          | 0,998 | 139,7    | 1,136 |
|             |       | 227,7          | 0,990 | 278      | 1,119 |
|             |       | 156,2          | 0,985 | 111,2    | 1,117 |
|             |       | 155,7          | 0,980 | 151,7    | 1,106 |
|             |       | 301            | 0,944 | 226,2    | 1,103 |
|             |       | 320            | 0,920 | 124,7    | 1,091 |
|             |       | 241,7          | 0,917 | 125,2    | 1,089 |
|             |       | 61,7           | 0,915 | 249,2    | 1,088 |
|             |       | 184,2          | 0,911 | 186,7    | 1,078 |
|             |       | 206,2          | 0,905 | 218,2    | 1,075 |
|             |       | 223,7          | 0,901 | 149,7    | 1,070 |
|             |       | 186,2          | 0,895 | 162,2    | 1,065 |
|             |       | 211,7          | 0,890 | 252,2    | 1,053 |
|             |       | 129,7          | 0,888 | 245,2    | 1,050 |
|             |       | 178,7          | 0,884 | 258,2    | 1,048 |
|             |       | 164,7          | 0,880 | 212,2    | 1,043 |
|             |       | 175,2          | 0,879 | 165,2    | 1,038 |
|             |       | 242,2          | 0,863 | 128,2    | 1,034 |
|             |       | 172,7          | 0,854 | 204,7    | 1,029 |

|              |       |              |       |
|--------------|-------|--------------|-------|
| <b>189,7</b> | 0,853 | <b>200,2</b> | 1,029 |
| <b>139,2</b> | 0,851 | <b>177,7</b> | 1,013 |
| <b>56,7</b>  | 0,848 | <b>146,7</b> | 1,009 |
| <b>150,2</b> | 0,845 | <b>142,7</b> | 1,007 |
| <b>167,7</b> | 0,841 | <b>321</b>   | 0,997 |
| <b>81,7</b>  | 0,839 | <b>231,7</b> | 0,993 |
| <b>131,2</b> | 0,836 | <b>112,2</b> | 0,988 |
| <b>259,7</b> | 0,832 | <b>161,7</b> | 0,971 |
| <b>192,7</b> | 0,798 | <b>148,2</b> | 0,970 |
| <b>145,2</b> | 0,794 | <b>301</b>   | 0,968 |
| <b>221,7</b> | 0,762 | <b>111,7</b> | 0,966 |
| <b>301</b>   | 0,758 | <b>161,2</b> | 0,957 |
| <b>70,7</b>  | 0,752 | <b>107,2</b> | 0,950 |
| <b>181,7</b> | 0,734 | <b>260</b>   | 0,939 |
| <b>198,2</b> | 0,726 | <b>147,7</b> | 0,936 |
| <b>228,2</b> | 0,711 | <b>157,7</b> | 0,932 |
| <b>151,7</b> | 0,699 | <b>110,7</b> | 0,922 |
| <b>100,2</b> | 0,615 | <b>252,7</b> | 0,918 |
|              |       | <b>100,2</b> | 0,916 |
|              |       | <b>145,2</b> | 0,905 |
|              |       | <b>216,2</b> | 0,903 |
|              |       | <b>129,7</b> | 0,889 |
|              |       | <b>169,2</b> | 0,871 |
|              |       | <b>128,7</b> | 0,858 |
|              |       | <b>241,2</b> | 0,858 |
|              |       | <b>184,2</b> | 0,856 |
|              |       | <b>167,7</b> | 0,852 |
|              |       | <b>156,2</b> | 0,838 |
|              |       | <b>259,2</b> | 0,827 |
|              |       | <b>211,7</b> | 0,825 |
|              |       | <b>241,7</b> | 0,805 |
|              |       | <b>254,7</b> | 0,800 |
|              |       | <b>139,2</b> | 0,751 |
|              |       | <b>223,2</b> | 0,735 |
|              |       | <b>153,7</b> | 0,733 |
|              |       | <b>222,7</b> | 0,718 |
|              |       | <b>207,7</b> | 0,705 |
|              |       | <b>92,7</b>  | 0,641 |
|              |       | <b>221,2</b> | 0,630 |
|              |       | <b>155,2</b> | 0,607 |
|              |       | <b>196,7</b> | 0,595 |
|              |       | <b>144,2</b> | 0,569 |
|              |       | <b>121,2</b> | 0,553 |
|              |       | <b>189,2</b> | 0,535 |
|              |       | <b>160,2</b> | 0,515 |
|              |       | <b>234,7</b> | 0,504 |
|              |       | <b>212,7</b> | 0,457 |

|              |       |
|--------------|-------|
| <b>224,7</b> | 0,383 |
| <b>312</b>   | 0,378 |
| <b>182,2</b> | 0,376 |
| <b>150,7</b> | 0,280 |
| <b>219,7</b> | 0,273 |
| <b>259,7</b> | 0,263 |
| <b>311</b>   | 0,225 |
| <b>225,2</b> | 0,192 |
| <b>255,2</b> | 0,163 |
| <b>303</b>   | 0,116 |
