# Supplementary material for: A novel approach to evaluation of adsorbents for sampling indoor volatile organic compounds associated with symptom reports
Source: Royal Society of Chemistry journal article supplement (doi:10.1039/b808654k), 2008-01-01
Supplement: tab_s13.pdf [file tab_s13.pdf]

**Table S13.** A summary of final PLS-DA models, separating SBS cases and controls, achieved with different adsorbents after peaks with no influence on separation has been removed in respective model.

| Adsorbent       | A | R2X    | R2X(cum) | Eigen values | R2Y   | R2Y(cum) | Q2     | Q2(cum) |
|-----------------|---|--------|----------|--------------|-------|----------|--------|---------|
| Carbopack B     | 1 | 0,113  | 0,113    | 2,25         | 0,35  | 0,35     | 0,183  | 0,183   |
| Chromosorb 106  | 1 | 0,186  | 0,186    | 4,65         | 0,279 | 0,279    | 0,0384 | 0,0384  |
|                 | 2 | 0,225  | 0,411    | 5,64         | 0,131 | 0,41     | 0,0289 | 0,0662  |
|                 | 3 | 0,134  | 0,546    | 3,36         | 0,104 | 0,515    | 0,0582 | 0,121   |
| Tenax TA        | 1 | 0,145  | 0,145    | 8,54         | 0,348 | 0,348    | 0,0255 | 0,0255  |
|                 | 2 | 0,12   | 0,265    | 7,1          | 0,299 | 0,647    | 0,28   | 0,298   |
|                 | 3 | 0,0663 | 0,331    | 3,91         | 0,163 | 0,81     | 0,162  | 0,412   |
| Carbopack B+    | 1 | 0,155  | 0,155    | 9,13         | 0,384 | 0,384    | 0,131  | 0,131   |
| Tenax TA        | 2 | 0,153  | 0,308    | 9,03         | 0,268 | 0,652    | 0,292  | 0,385   |
|                 | 3 | 0,0816 | 0,389    | 4,81         | 0,165 | 0,817    | 0,295  | 0,567   |
| Carbopack B+    | 1 | 0,169  | 0,169    | 9,98         | 0,494 | 0,494    | 0,365  | 0,365   |
| Chromosorb 106+ | 2 | 0,166  | 0,335    | 9,77         | 0,23  | 0,724    | 0,352  | 0,589   |
| Tenax TA        |   |        |          |              |       |          |        |         |

A=Component

R2X=Explained variation in X by the component (0-1)

R2Y=Explained variation in Y by the component (0-1)

(cum)=Cumulative

Q2=Predictive ability (0-1)
